# Supplementary material for: Cationic Functionalisation by Phosphenium Ion Insertion
Source: PubMed Central journal article supplement — Chemistry. 2020 Nov 23;26(71):17165–70. doi: 10.1002/chem.202003291 (PMC7839539; doi:10.1002/chem.202003291), 2020-11-23
Supplement: CHEM-26-17165-s001.pdf [file CHEM-26-17165-s001.pdf]

# Chemistry–A European Journal

Supporting Information

## **Cationic Functionalisation by Phosphenium Ion Insertion**

Christoph Riesinger, Luis Dütsch, Gábor Balázs, Michael Bodensteiner, and  
Manfred Scheer\*<sup>[a]</sup>

## SUPPORTING INFORMATION

## Table of Contents

|                                                                                                                                                                        |    |
|------------------------------------------------------------------------------------------------------------------------------------------------------------------------|----|
| Table of Contents .....                                                                                                                                                | 2  |
| Experimental Procedures .....                                                                                                                                          | 3  |
| General Considerations .....                                                                                                                                           | 3  |
| Synthesis:.....                                                                                                                                                        | 3  |
| [Cp <sup>'''</sup> Ni(η <sup>3</sup> -P <sub>4</sub> Ph <sub>2</sub> )] [OTf] (2a[OTf]) .....                                                                          | 3  |
| [Cp <sup>'''</sup> Ni(η <sup>3</sup> -P <sub>4</sub> Ph <sub>2</sub> )] [SbF <sub>6</sub> ] (2a[SbF <sub>6</sub> ]) .....                                              | 4  |
| [Cp <sup>'''</sup> Ni(η <sup>3</sup> -P <sub>4</sub> Ph <sub>2</sub> )] [TEF] (2a[TEF]) .....                                                                          | 4  |
| [Cp <sup>'''</sup> Ni(η <sup>3</sup> -P <sub>4</sub> Ph <sub>2</sub> )] [BAR <sup>F</sup> ] (2a[BAR <sup>F</sup> ]) .....                                              | 4  |
| [Cp <sup>'''</sup> Ni(η <sup>3</sup> -P <sub>4</sub> Ph <sub>2</sub> )] [GaCl <sub>4</sub> ] (2a[GaCl <sub>4</sub> ]) .....                                            | 5  |
| [Cp <sup>'''</sup> Ni(η <sup>3</sup> -P <sub>4</sub> Mes <sub>2</sub> )] [GaCl <sub>4</sub> ] (2b[GaCl <sub>4</sub> ]) .....                                           | 5  |
| [Cp <sup>'''</sup> Ni(η <sup>3</sup> -P <sub>4</sub> Mes <sub>2</sub> )] [TEF] (2b[TEF]) .....                                                                         | 5  |
| [Cp <sup>'''</sup> Ni(η <sup>3</sup> -P <sub>4</sub> Cy <sub>2</sub> )] [GaCl <sub>4</sub> ] (2c[GaCl <sub>4</sub> ]) .....                                            | 6  |
| [Cp <sup>'''</sup> Ni(η <sup>3</sup> -P <sub>4</sub> Cy <sub>2</sub> )] [TEF] (2c[TEF]) .....                                                                          | 6  |
| [Cp <sup>'''</sup> Ni(η <sup>3</sup> -P <sub>4</sub> biphen)] [GaCl <sub>4</sub> ] (2d[GaCl <sub>4</sub> ]) .....                                                      | 6  |
| [Cp <sup>'''</sup> Ni(η <sup>3</sup> -P <sub>4</sub> biphen)] [TEF] (2d[TEF]) .....                                                                                    | 7  |
| [Cp <sup>'''</sup> Ni(η <sup>3</sup> -P <sub>4</sub> Me <sub>2</sub> )] [TEF] (2e[TEF]) .....                                                                          | 7  |
| [Cp <sup>'''</sup> Ni(η <sup>3</sup> -P <sub>4</sub> PhCl)] [TEF] (2f[TEF]) .....                                                                                      | 8  |
| [Cp <sup>'''</sup> Ni(η <sup>3</sup> -P <sub>4</sub> <sup>t</sup> BuCl)] [TEF] (2g[TEF]) .....                                                                         | 8  |
| [(Cp <sup>'''</sup> Ni) <sub>2</sub> (μ; η <sup>3</sup> :η <sup>1</sup> :η <sup>1</sup> -P <sub>4</sub> Br <sub>3</sub> )] [TEF] (3a[TEF]) .....                       | 8  |
| [(Cp <sup>'''</sup> Ni) <sub>2</sub> (μ; η <sup>3</sup> :η <sup>1</sup> :η <sup>1</sup> -P <sub>4</sub> biphenCl)] [GaCl <sub>4</sub> ] (3b[GaCl <sub>4</sub> ]) ..... | 9  |
| [(Cp <sup>'''</sup> Ni) <sub>2</sub> (μ; η <sup>3</sup> -P <sub>3</sub> )] [GaCl <sub>4</sub> ] (4) .....                                                              | 9  |
| Tested reactions and conditions .....                                                                                                                                  | 10 |
| NMR spectroscopic investigations .....                                                                                                                                 | 10 |
| X-ray crystallographic information .....                                                                                                                               | 15 |
| 1 .....                                                                                                                                                                | 17 |
| 2a[OTf] .....                                                                                                                                                          | 17 |
| 2a[SbF <sub>6</sub> ] .....                                                                                                                                            | 18 |
| 2a[TEF] .....                                                                                                                                                          | 18 |
| 2c[GaCl <sub>4</sub> ] (o-DFB) <sub>0.5</sub> .....                                                                                                                    | 19 |
| 2d[GaCl <sub>4</sub> ] (n-hex) <sub>0.4</sub> .....                                                                                                                    | 20 |
| 2e[TEF] .....                                                                                                                                                          | 20 |
| 2f <sub>endo</sub> [TEF] .....                                                                                                                                         | 21 |
| 3a[TEF] .....                                                                                                                                                          | 22 |
| 3b[GaCl <sub>4</sub> ] .....                                                                                                                                           | 23 |
| 4[GaCl <sub>4</sub> ] (o-DFB) <sub>0.33</sub> (n-pent) <sub>0.33</sub> .....                                                                                           | 24 |
| Details on computational results .....                                                                                                                                 | 25 |
| [CpNi(η <sup>3</sup> -P <sub>3</sub> )]: .....                                                                                                                         | 25 |
| [Me <sub>2</sub> P] <sup>+</sup> : .....                                                                                                                               | 25 |

## SUPPORTING INFORMATION

|                                                                                                         |    |
|---------------------------------------------------------------------------------------------------------|----|
| $[\text{CpNi}(\eta^3\text{-P}_4\text{Me}_2)]^+$ ( <b>12</b> ):                                          | 26 |
| $[\text{CpNi}(\eta^3\text{-P}_4\text{Me}_2)]^+$ ( <b>TS2</b> ):                                         | 26 |
| $[\text{CpNi}(\eta^3\text{-P}_4\text{Me}_2)]^+$ ( <b>P2</b> ):                                          | 27 |
| $[\text{Cp}''\text{Ni}(\eta^3\text{-P}_4\text{PhCl})]^+$ ( <b>2f<sub>endo</sub></b> ):                  | 28 |
| $[\text{Cp}''\text{Ni}(\eta^3\text{-P}_4\text{ClPh})]^+$ ( <b>2f<sub>exo</sub></b> ):                   | 29 |
| $[\text{Cp}''\text{Ni}(\eta^3\text{-P}_4\text{tBuCl})]^+$ ( <b>2g<sub>endo</sub></b> ):                 | 31 |
| $[\text{Cp}''\text{Ni}(\eta^3\text{-P}_4\text{CltBu})]^+$ ( <b>2g<sub>exo</sub></b> ):                  | 32 |
| $[(\text{Cp}''\text{Ni})_2(\mu\text{-}\eta^3\text{-}\eta^1\text{-P}_4\text{Br}_3)]^+$ ( <b>3a</b> ):    | 34 |
| $[(\text{Cp}''\text{Ni})_2(\mu\text{-}\eta^3\text{-}\eta^1\text{-P}_4\text{biphenC})]^+$ ( <b>3b</b> ): | 36 |
| Selected canonical molecular orbitals of <b>3a</b> :                                                    | 39 |
| References:                                                                                             | 39 |

## Experimental Procedures

## General Considerations

All manipulations were carried out using standard Schlenk techniques at a Stock apparatus with N<sub>2</sub> as an inert gas or in a glove box with Ar atmosphere. All glassware was dried with a heat gun (600 °C) for at least 30 min prior to use. *o*-DFB was distilled from P<sub>2</sub>O<sub>5</sub>, CD<sub>2</sub>Cl<sub>2</sub> was distilled from CaH<sub>2</sub> and other solvents were directly taken from an MB SPS-800 solvent purification system and degassed at room temperature. Solution <sup>1</sup>H (400.130 MHz), <sup>19</sup>F (376.498 MHz) and <sup>31</sup>P (161.976 MHz) NMR spectra were recorded at an Avance400 (Bruker) spectrometer using (H<sub>3</sub>C)<sub>4</sub>Si (<sup>1</sup>H), CFCI<sub>3</sub> (<sup>19</sup>F) or 85% phosphoric acid (<sup>31</sup>P), respectively, as external standards. Chemical shifts (δ) are provided in parts per million (ppm) and coupling constants (J) are reported in Hertz (Hz). Chemical shifts and coupling constants for all <sup>31</sup>P{<sup>1</sup>H} and <sup>31</sup>P NMR spectra were derived from spectral simulation. The following abbreviations are used: s = singlet, d = doublet, dd = doublet of doublets, ddd = doublet of doublets of doublets, t = triplet, br = broad and m = multiplet. ESI mass spectra were recorded at the internal mass spectrometry department using a ThermoQuest Finnigan TSQ 7000 mass spectrometer and peak assignment was performed using the Molecular weight calculator 6.50.<sup>[1]</sup> Elemental analysis of the products was conducted by the elemental analysis department at the University of Regensburg using an Elementar Vario EL. The starting materials [Cp''Ni(η<sup>3</sup>-P<sub>3</sub>)] (**1**),<sup>[2]</sup> Ti[TEF]<sup>[3]</sup>, [(Et<sub>3</sub>Si)<sub>2</sub>(μ-H)][BARF]<sup>[4]</sup>, (2,2'-biphen)PCl<sup>[5]</sup> and tBuPCl<sub>2</sub><sup>[6]</sup> were synthesized following literature procedures. All other chemicals were purchased from commercial vendors. GaCl<sub>3</sub> was sublimed and all purchased halogenophosphanes were distilled before use.

## Synthesis:

 $[\text{Cp}''\text{Ni}(\eta^3\text{-P}_4\text{Ph}_2)]\text{[OTf]}$  (**2a**[OTf])

A colourless solution of Ph<sub>2</sub>PCl (0.1 mmol, 22 mg, 17.9 μL, 1 eq.) in 1 mL of toluene was added to an orange solution of **1** (0.1 mmol, 38 mg, 1 eq.) and Ti[OTf] (0.1 mmol, 35 mg, 1 eq.) in 5 mL of *o*-DFB at room temperature. Immediate precipitation of small amounts of white solid occurred and a colour change to dark red could be observed upon stirring for 24 h. The mixture was then filtered through glass fibre filter paper and upon addition of 50 mL of *n*-hexane a dark red oil was precipitated. This oil was washed three times with 10 mL of *n*-hexane, each, and dried under reduced pressure (10<sup>-3</sup> mbar). Dissolving the residue in *o*-DFB and layering with *n*-hexane (ratio of 1:8) yielded [Cp''Ni(η<sup>3</sup>-P<sub>4</sub>Ph<sub>2</sub>)] [OTf] (**2a**[OTf]) after five days at room temperature as small red plates suitable for single crystal X-ray analysis.

|                             |                                                                                                                                                                                                                   |
|-----------------------------|-------------------------------------------------------------------------------------------------------------------------------------------------------------------------------------------------------------------|
| Yield:                      | 45 mg (0.063 mmol, 63%)                                                                                                                                                                                           |
| Elemental analysis:         | calc. (%) for [Cp''Ni(η <sup>3</sup> -P <sub>4</sub> Ph <sub>2</sub> )] [OTf] (C <sub>30</sub> H <sub>41</sub> O <sub>3</sub> F <sub>3</sub> P <sub>4</sub> SNi): C: 50.09 H: 5.47<br>found (%): C: 50.01 H: 5.32 |
| ESI(+)-MS ( <i>o</i> -DFB): | <i>m/z</i> (%) = 569.1 (100%) [Cp''Ni(η <sup>3</sup> -P <sub>4</sub> Ph <sub>2</sub> )] <sup>+</sup>                                                                                                              |

## SUPPORTING INFORMATION

NMR (CD<sub>2</sub>Cl<sub>2</sub>, 298 K): <sup>1</sup>H: δppm = 1.21 (s, 9 H, C(CH<sub>3</sub>)<sub>3</sub>), 1.31 (s, 18 H, C(CH<sub>3</sub>)<sub>3</sub>), 5.92 (s, 2 H, C<sub>5</sub>H<sub>2</sub>BU<sub>3</sub>), 7.54–7.86 (br, 10 H, Ph)  
<sup>31</sup>P{<sup>1</sup>H}: (AMM'X spin system) δppm = 12.4 (ddd, <sup>1</sup>J<sub>PX-PM/PM'</sub> = 270.3 Hz, <sup>2</sup>J<sub>PX-PA</sub> = 14.2 Hz, 1 P, P<sup>X</sup>), 57.8 (ddd, <sup>1</sup>J<sub>PM/PM'-PX</sub> = 270.3 Hz, <sup>1</sup>J<sub>PM/PM'-PA</sub> = 288.1 Hz, 2 P, P<sup>MM</sup>), 73.8 (ddd, <sup>1</sup>J<sub>PA-PM/PM'</sub> = 288.1 Hz, <sup>2</sup>J<sub>PA-PX</sub> = 14.2 Hz, 1 P, P<sup>A</sup>)  
<sup>31</sup>P: (AMM'X spin system) δppm = 12.4 (t, <sup>1</sup>J<sub>PX-PM/PM'</sub> = 270.3 Hz, 1 P, P<sup>X</sup>), 57.8 (ddd, <sup>1</sup>J<sub>PM/PM'-PX</sub> = 270.3 Hz, <sup>1</sup>J<sub>PM/PM'-PA</sub> = 288.1 Hz, 2 P, P<sup>MM</sup>), 73.8 (ddd, <sup>1</sup>J<sub>PA-PM/PM'</sub> = 288.1 Hz, <sup>2</sup>J<sub>PA-PX</sub> = 14.2 Hz, 1 P, P<sup>A</sup>)  
<sup>19</sup>F{<sup>1</sup>H}: δppm = -78.75 (s, [OTf]<sup>-</sup>)

*[Cp''Ni(η<sup>3</sup>-P<sub>4</sub>Ph<sub>2</sub>)] [SbF<sub>6</sub>] (2a[SbF<sub>6</sub>])*

A colourless solution of Ph<sub>2</sub>PCI (0.1 mmol, 22 mg, 17.9 μL, 1 eq.) in 1 mL of toluene was added to an orange solution of [Cp''Ni(η<sup>3</sup>-P<sub>3</sub>)] (0.1 mmol, 38 mg, 1 eq.) and Ag[SbF<sub>6</sub>] (0.1 mmol, 34 mg, 1 eq.) in 5 mL of *o*-DFB at room temperature. Immediate precipitation of small amounts of white solid and a colour change to red could be observed. After stirring for 24 h at room temperature the mixture was filtered through glass fibre filter paper and upon addition of 50 mL of *n*-hexane, a dark red solid precipitated. The precipitate was washed three times with 10 mL of *n*-hexane, each, and dried under reduced pressure (10<sup>-3</sup> mbar). Recrystallisation from *o*-DFB/*n*-hexane (1:8) at room temperature yielded [Cp''Ni(η<sup>3</sup>-P<sub>4</sub>Ph<sub>2</sub>)] [SbF<sub>6</sub>] (**2a**[SbF<sub>6</sub>]) as red platelets, suitable for X-ray analysis after one week.

Yield: 27 mg (0.037 mmol, 37%)  
 Elemental analysis: calc. (%) for [Cp''Ni(η<sup>3</sup>-P<sub>4</sub>Ph<sub>2</sub>)] [SbF<sub>6</sub>] (C<sub>29</sub>H<sub>41</sub>F<sub>6</sub>P<sub>4</sub>NiSb): C: 43.22 H: 4.88  
 found (%): C: 43.55 H: 4.62  
 ESI(+)-MS (*o*-DFB): *m/z* (%) = 569.1 (100%) [Cp''Ni(η<sup>3</sup>-P<sub>4</sub>Ph<sub>2</sub>)]<sup>+</sup>  
 NMR (CD<sub>2</sub>Cl<sub>2</sub>, 298 K): <sup>1</sup>H: δppm = 1.21 (s, 9 H, C(CH<sub>3</sub>)<sub>3</sub>), 1.31 (s, 18 H, C(CH<sub>3</sub>)<sub>3</sub>), 5.92 (s, 2 H, C<sub>5</sub>H<sub>2</sub>BU<sub>3</sub>), 7.54–7.86 (br, 10 H, Ph)  
<sup>31</sup>P{<sup>1</sup>H}: (AMM'X spin system) δppm = 12.4 (ddd, <sup>1</sup>J<sub>PX-PM/PM'</sub> = 270.3 Hz, <sup>2</sup>J<sub>PX-PA</sub> = 14.2 Hz, 1 P, P<sup>X</sup>), 57.8 (ddd, <sup>1</sup>J<sub>PM/PM'-PX</sub> = 270.3 Hz, <sup>1</sup>J<sub>PM/PM'-PA</sub> = 288.1 Hz, 2 P, P<sup>MM</sup>), 73.8 (ddd, <sup>1</sup>J<sub>PA-PM/PM'</sub> = 288.1 Hz, <sup>2</sup>J<sub>PA-PX</sub> = 14.2 Hz, 1 P, P<sup>A</sup>)  
<sup>31</sup>P: (AMM'X spin system) δppm = 12.4 (t, <sup>1</sup>J<sub>PX-PM/PM'</sub> = 270.3 Hz, 1 P, P<sup>X</sup>), 57.8 (ddd, <sup>1</sup>J<sub>PM/PM'-PX</sub> = 270.3 Hz, <sup>1</sup>J<sub>PM/PM'-PA</sub> = 288.1 Hz, 2 P, P<sup>MM</sup>), 73.8 (ddd, <sup>1</sup>J<sub>PA-PM/PM'</sub> = 288.1 Hz, <sup>2</sup>J<sub>PA-PX</sub> = 14.2 Hz, 1 P, P<sup>A</sup>)  
<sup>19</sup>F{<sup>1</sup>H}: δppm = -122.7 (br, [SbF<sub>6</sub>]<sup>-</sup>)

*[Cp''Ni(η<sup>3</sup>-P<sub>4</sub>Ph<sub>2</sub>)] [TEF] (2a[TEF])*

A colourless solution of Ph<sub>2</sub>PCI (0.1 mmol, 22 mg, 17.9 μL, 1 eq.) in 1 mL of toluene was added to an orange solution of **1** (0.1 mmol, 38 mg, 1 eq.) and Ti[TEF] (0.1 mmol, 117 mg, 1 eq., [TEF]<sup>-</sup> = [Al(OC(CF<sub>3</sub>)<sub>3</sub>)<sub>4</sub>]<sup>-</sup>) in 5 mL of *o*-DFB at room temperature. Immediate precipitation of small amounts of white solid and a slow colour change to red could be observed. After stirring for 24 h at room temperature the mixture was filtered through glass fibre filter paper and the solvent was removed *in vacuo*. The oily red residue was washed three times with 10 mL of *n*-hexane, each, and dried under reduced pressure (10<sup>-3</sup> mbar). Dark red crystals of [Cp''Ni(η<sup>3</sup>-P<sub>4</sub>Ph<sub>2</sub>)] [TEF] (**2a**[TEF]), suitable for X-ray analysis could be obtained by slowly evaporating CH<sub>2</sub>Cl<sub>2</sub> from a concentrated solution. Performing the same reaction with Ag[TEF] instead of Ti[TEF] results in diminished yields.

Yield: 80 mg (0.052 mmol, 52%)  
 Elemental analysis: calc. (%) for [Cp''Ni(η<sup>3</sup>-P<sub>4</sub>Ph<sub>2</sub>)] [TEF] (C<sub>45</sub>H<sub>41</sub>O<sub>4</sub>F<sub>36</sub>AlP<sub>4</sub>Ni): C: 35.16 H: 2.56  
 found (%): C: 35.17 H: 2.53  
 ESI(+)-MS (*o*-DFB): *m/z* (%) = 569.1 (100%) [Cp''Ni(η<sup>3</sup>-P<sub>4</sub>Ph<sub>2</sub>)]<sup>+</sup>  
 NMR (CD<sub>2</sub>Cl<sub>2</sub>, 298 K): <sup>1</sup>H: δppm = 1.21 (s, 9 H, C(CH<sub>3</sub>)<sub>3</sub>), 1.31 (s, 18 H, C(CH<sub>3</sub>)<sub>3</sub>), 5.92 (s, 2 H, C<sub>5</sub>H<sub>2</sub>BU<sub>3</sub>), 7.54–7.86 (br, 10 H, Ph)  
<sup>31</sup>P{<sup>1</sup>H}: (AMM'X spin system) δppm = 12.4 (ddd, <sup>1</sup>J<sub>PX-PM/PM'</sub> = 270.3 Hz, <sup>2</sup>J<sub>PX-PA</sub> = 14.2 Hz, 1 P, P<sup>X</sup>), 57.8 (ddd, <sup>1</sup>J<sub>PM/PM'-PX</sub> = 270.3 Hz, <sup>1</sup>J<sub>PM/PM'-PA</sub> = 288.1 Hz, 2 P, P<sup>MM</sup>), 73.8 (ddd, <sup>1</sup>J<sub>PA-PM/PM'</sub> = 288.1 Hz, <sup>2</sup>J<sub>PA-PX</sub> = 14.2 Hz, 1 P, P<sup>A</sup>)  
<sup>31</sup>P: (AMM'X spin system) δppm = 12.4 (t, <sup>1</sup>J<sub>PX-PM/PM'</sub> = 270.3 Hz, 1 P, P<sup>X</sup>), 57.8 (ddd, <sup>1</sup>J<sub>PM/PM'-PX</sub> = 270.3 Hz, <sup>1</sup>J<sub>PM/PM'-PA</sub> = 288.1 Hz, 2 P, P<sup>MM</sup>), 73.8 (ddd, <sup>1</sup>J<sub>PA-PM/PM'</sub> = 288.1 Hz, <sup>2</sup>J<sub>PA-PX</sub> = 14.2 Hz, 1 P, P<sup>A</sup>)  
<sup>19</sup>F{<sup>1</sup>H}: δppm = -75.62 (s, [TEF]<sup>-</sup>)

*[Cp''Ni(η<sup>3</sup>-P<sub>4</sub>Ph<sub>2</sub>)] [BAR<sup>F</sup>] (2a[BAR<sup>F</sup>])*

A colourless solution of [(Et<sub>3</sub>Si)<sub>2</sub>(μ-H)][BAR<sup>F</sup>] (0.1 mmol, 91 mg, 1 eq., [BAR<sup>F</sup>]<sup>-</sup> = [B(C<sub>6</sub>F<sub>5</sub>)<sub>4</sub>]<sup>-</sup>) in 3 mL of *o*-DFB was added to an orange solution of **1** (0.1 mmol, 38 mg, 1 eq.) and Ph<sub>2</sub>PCI (0.1 mmol, 22 mg, 17.9 μL, 1 eq.) in 4 mL of *o*-DFB at room temperature. Immediate colour change to red could be observed. After stirring for 6 h at room temperature the solvent was removed *in vacuo*. The oily red residue was washed three times with 10 mL of *n*-hexane, each, and dried under reduced pressure (10<sup>-3</sup> mbar) leading to solidification. [Cp''Ni(η<sup>3</sup>-P<sub>4</sub>Ph<sub>2</sub>)] [BAR<sup>F</sup>] (**2a**[BAR<sup>F</sup>]) was isolated as an orange to red powder. All attempts to obtain (**2a**[BAR<sup>F</sup>]) as a single crystalline material failed.

## SUPPORTING INFORMATION

Yield: 45 mg (0.037 mmol, 37%)  
 Elemental analysis: calc. (%) for  $[\text{Cp}^{\text{***}}\text{Ni}(\eta^3\text{-P}_4\text{Ph}_2)][\text{BAr}^{\text{F}}](\text{C}_6\text{H}_4\text{F}_2)_{1.5}$  ( $\text{C}_{62}\text{H}_{47}\text{BF}_{23}\text{P}_4\text{Ni}$ ): C: 51.98 H: 3.18  
 found (%): C: 52.35 H: 2.87 (Signals for  $\text{C}_6\text{H}_4\text{F}_2$  are also found in the  $^1\text{H}$  NMR of the isolated product)  
 ESI(+) MS (*o*-DFB):  $m/z$  (%) = 569.1 (100%)  $[\text{Cp}^{\text{***}}\text{Ni}(\eta^3\text{-P}_4\text{Ph}_2)]^+$   
 NMR ( $\text{CD}_2\text{Cl}_2$ , 298 K):  $^1\text{H}$ :  $\delta$ ppm = 1.21 (s, 9 H,  $\text{C}(\text{CH}_3)_3$ ), 1.31 (s, 18 H,  $\text{C}(\text{CH}_3)_3$ ), 5.92 (s, 2 H,  $\text{C}_5\text{H}_2\text{Bu}_3$ ), 7.54–7.86 (br, 10 H, Ph)  
 $^{31}\text{P}\{^1\text{H}\}$ : (AMM'X spin system)  $\delta$ ppm = 12.4 (ddd,  $^1J_{\text{P}_X\text{-P}_M/\text{P}_M} = 270.3$  Hz,  $^2J_{\text{P}_X\text{-P}_A} = 14.2$  Hz, 1 P,  $\text{P}^{\text{X}}$ ), 57.8 (ddd,  $^1J_{\text{P}_M/\text{P}_M\text{-P}_X} = 270.3$  Hz,  $^1J_{\text{P}_M/\text{P}_M\text{-P}_A} = 288.1$  Hz, 2 P,  $\text{P}^{\text{M/M}}$ ), 73.8 (ddd,  $^1J_{\text{P}_A\text{-P}_M/\text{P}_M} = 288.1$  Hz,  $^2J_{\text{P}_A\text{-P}_X} = 14.2$  Hz, 1 P,  $\text{P}_A$ )  
 $^{31}\text{P}$ : (AMM'X spin system)  $\delta$ ppm = 12.4 (t,  $^1J_{\text{P}_X\text{-P}_M/\text{P}_M} = 270.3$  Hz, 1 P,  $\text{P}^{\text{X}}$ ), 57.8 (ddd,  $^1J_{\text{P}_M/\text{P}_M\text{-P}_X} = 270.3$  Hz,  $^1J_{\text{P}_M/\text{P}_M\text{-P}_A} = 288.1$  Hz, 2 P,  $\text{P}^{\text{M/M}}$ ), 73.8 (ddd,  $^1J_{\text{P}_A\text{-P}_M/\text{P}_M} = 288.1$  Hz,  $^2J_{\text{P}_A\text{-P}_X} = 14.2$  Hz, 1 P,  $\text{P}^A$ )  
 $^{19}\text{F}\{^1\text{H}\}$ :  $\delta$ ppm = -167.4 (t, 2 F,  $[\text{BAr}^{\text{F}}]^-$ ), -163.6 (t, 1 F,  $[\text{BAr}^{\text{F}}]^-$ ), -133.0 (br, 2 F,  $[\text{BAr}^{\text{F}}]^-$ )

 $[\text{Cp}^{\text{***}}\text{Ni}(\eta^3\text{-P}_4\text{Ph}_2)][\text{GaCl}_4]$  (**2a** $[\text{GaCl}_4]$ )

A colourless solution of  $\text{GaCl}_3$  (0.1 mmol, 18 mg, 1 eq.) in 4 mL of *o*-DFB was added to an orange solution of **1** (0.1 mmol, 38 mg, 1 eq.) and  $\text{Ph}_2\text{PCI}$  (0.1 mmol, 22 mg, 17.9  $\mu\text{L}$ , 1 eq.) in 3 mL of *o*-DFB at room temperature. A rapid colour change to dark red occurred. After stirring for 4 h at room temperature the solvent was removed *in vacuo* and the oily red residue was washed three times with 10 mL of *n*-hexane, each. Drying under reduced pressure ( $10^{-3}$  mbar) lead to solidification and dark red crystals of  $[\text{Cp}^{\text{***}}\text{Ni}(\eta^3\text{-P}_4\text{Ph}_2)][\text{GaCl}_4]$  (**2a** $[\text{GaCl}_4]$ ), suitable for X-ray analysis could be obtained by recrystallisation from *o*-DFB/*n*-hexane (1:6) at room temperature after seven days.

Yield: 55 mg (0.071 mmol, 71%)  
 Elemental analysis: calc. (%) for  $[\text{Cp}^{\text{***}}\text{Ni}(\eta^3\text{-P}_4\text{Ph}_2)][\text{GaCl}_4]$  ( $\text{C}_{29}\text{H}_{41}\text{P}_4\text{Cl}_4\text{NiGa}$ ): C: 44.56 H: 5.03  
 found (%): C: 44.49 H: 5.11  
 ESI(+) MS (*o*-DFB):  $m/z$  (%) = 569.1 (100%)  $[\text{Cp}^{\text{***}}\text{Ni}(\eta^3\text{-P}_4\text{Ph}_2)]^+$   
 NMR ( $\text{CD}_2\text{Cl}_2$ , 298 K):  $^1\text{H}$ :  $\delta$ ppm = 1.21 (s, 9 H,  $\text{C}(\text{CH}_3)_3$ ), 1.31 (s, 18 H,  $\text{C}(\text{CH}_3)_3$ ), 5.92 (s, 2 H,  $\text{C}_5\text{H}_2\text{Bu}_3$ ), 7.54–7.86 (br, 10 H, Ph)  
 $^{31}\text{P}\{^1\text{H}\}$ : (AMM'X spin system)  $\delta$ ppm = 12.4 (ddd,  $^1J_{\text{P}_X\text{-P}_M/\text{P}_M} = 270.3$  Hz,  $^2J_{\text{P}_X\text{-P}_A} = 14.2$  Hz, 1 P,  $\text{P}^{\text{X}}$ ), 57.8 (ddd,  $^1J_{\text{P}_M/\text{P}_M\text{-P}_X} = 270.3$  Hz,  $^1J_{\text{P}_M/\text{P}_M\text{-P}_A} = 288.1$  Hz, 2 P,  $\text{P}^{\text{M/M}}$ ), 73.8 (ddd,  $^1J_{\text{P}_A\text{-P}_M/\text{P}_M} = 288.1$  Hz,  $^2J_{\text{P}_A\text{-P}_X} = 14.2$  Hz, 1 P,  $\text{P}^A$ )  
 $^{31}\text{P}$ : (AMM'X spin system)  $\delta$ ppm = 12.4 (t,  $^1J_{\text{P}_X\text{-P}_M/\text{P}_M} = 270.3$  Hz, 1 P,  $\text{P}^{\text{X}}$ ), 57.8 (ddd,  $^1J_{\text{P}_M/\text{P}_M\text{-P}_X} = 270.3$  Hz,  $^1J_{\text{P}_M/\text{P}_M\text{-P}_A} = 288.1$  Hz, 2 P,  $\text{P}^{\text{M/M}}$ ), 73.8 (ddd,  $^1J_{\text{P}_A\text{-P}_M/\text{P}_M} = 288.1$  Hz,  $^2J_{\text{P}_A\text{-P}_X} = 14.2$  Hz, 1 P,  $\text{P}^A$ )

 $[\text{Cp}^{\text{***}}\text{Ni}(\eta^3\text{-P}_4\text{Mes}_2)][\text{GaCl}_4]$  (**2b** $[\text{GaCl}_4]$ )

A colourless solution of  $\text{GaCl}_3$  (0.1 mmol, 18 mg, 1 eq.) in 4 mL of *o*-DFB was added to an orange solution of **1** (0.1 mmol, 38 mg, 1 eq.) and  $\text{Mes}_2\text{PCI}$  (0.1 mmol, 30 mg, 1 eq.) in 3 mL of *o*-DFB at room temperature. A rapid colour change to red occurred. After stirring for 6 h at room temperature the solvent was removed *in vacuo* and the oily red residue was washed three times with 10 mL of *n*-hexane, each. Drying under reduced pressure ( $10^{-3}$  mbar) lead to solidification of the product  $[\text{Cp}^{\text{***}}\text{Ni}(\eta^3\text{-P}_4\text{Mes}_2)][\text{GaCl}_4]$  (**2b** $[\text{GaCl}_4]$ ), which was isolated as a red powder. All attempts to recrystallise the product ended in the formation of red oil at the bottom of the flask.

Yield: 46 mg (0.053 mmol, 53%)  
 Elemental analysis: calc. (%) for  $[\text{Cp}^{\text{***}}\text{Ni}(\eta^3\text{-P}_4\text{Mes}_2)][\text{GaCl}_4]$  ( $\text{C}_{35}\text{H}_{51}\text{P}_4\text{Cl}_4\text{NiGa}$ ): C: 48.72 H: 5.96  
 found (%): C: 48.29 H: 5.79  
 ESI(+) MS (*o*-DFB):  $m/z$  (%) = 653.2 (100%)  $[\text{Cp}^{\text{***}}\text{Ni}(\eta^3\text{-P}_4\text{Mes}_2)]^+$   
 NMR ( $\text{CD}_2\text{Cl}_2$ , 298 K):  $^1\text{H}$ :  $\delta$ ppm = 1.14 (s, 9 H,  $\text{C}(\text{CH}_3)_3$ ), 1.29 (s, 18 H,  $\text{C}(\text{CH}_3)_3$ ), 2.32 (s, 6 H, Me), 2.64 (s, 6 H, Me), 2.73 (s, 6 H, Me), 5.92 (d,  $^4J = 1.4$  Hz, 2 H,  $\text{C}_5\text{H}_2\text{Bu}_3$ ), 6.98 (d,  $^4J = 4.2$  Hz, 2 H, Mes), 7.01 (d,  $^4J = 4.6$  Hz, 2 H, Mes)  
 $^{31}\text{P}\{^1\text{H}\}$ : (AA'MX spin system)  $\delta$ ppm = -3.1 (t,  $^1J_{\text{P}_X\text{-P}_A/\text{P}_A} = 267.7$  Hz, 1 P,  $\text{P}^{\text{X}}$ ), 45.6 (t,  $^1J_{\text{P}_M\text{-P}_A/\text{P}_A} = 294.8$  Hz, 1 P,  $\text{P}^{\text{M}}$ ), 103.7 (dd,  $^1J_{\text{P}_A/\text{P}_A\text{-P}_X} = 267.7$  Hz,  $^1J_{\text{P}_A/\text{P}_A\text{-P}_M} = 294.8$  Hz, 2 P,  $\text{P}^A/A$ )  
 $^{31}\text{P}\{^1\text{H}\}$ : (AA'MX spin system)  $\delta$ ppm = -3.1 (t,  $^1J_{\text{P}_X\text{-P}_A/\text{P}_A} = 267.7$  Hz, 1 P,  $\text{P}^{\text{X}}$ ), 45.6 (t,  $^1J_{\text{P}_M\text{-P}_A/\text{P}_A} = 294.8$  Hz, 1 P,  $\text{P}^{\text{M}}$ ), 103.7 (dd,  $^1J_{\text{P}_A/\text{P}_A\text{-P}_X} = 267.7$  Hz,  $^1J_{\text{P}_A/\text{P}_A\text{-P}_M} = 294.8$  Hz, 2 P,  $\text{P}^A/A$ )

 $[\text{Cp}^{\text{***}}\text{Ni}(\eta^3\text{-P}_4\text{Mes}_2)][\text{TEF}]$  (**2b** $[\text{TEF}]$ )

A colourless solution of  $\text{Ti}[\text{TEF}]$  (0.1 mmol, 117 mg, 1 eq.,  $[\text{TEF}]^- = [\text{Al}(\text{OC}(\text{CF}_3)_3)_4]^-$ ) in 2 mL of *o*-DFB was added to an orange solution of **1** (0.1 mmol, 38 mg, 1 eq.) and  $\text{Mes}_2\text{PCI}$  (0.1 mmol, 30 mg, 1 eq.) in 3 mL of *o*-DFB at room temperature. A rapid colour change to red occurred and formation of white solid could be observed. After stirring for 24 h at room temperature, the mixture was filtered, and the solvent removed *in vacuo*. The oily red residue was washed three times with 10 mL of *n*-hexane, each. Drying under reduced

## SUPPORTING INFORMATION

pressure ( $10^{-3}$  mbar) lead to solidification of the product  $[\text{Cp}^{\text{***}}\text{Ni}(\eta^3\text{-P}_4\text{Mes}_2)][\text{TEF}]$  (**2b**[TEF]), which was isolated as a red powder. All attempts to recrystallise the product ended in the formation of red oil at the bottom of the flask.

Yield: 75 mg (0.046 mmol, 46%)

Elemental analysis: calc. (%) for  $[\text{Cp}^{\text{***}}\text{Ni}(\eta^3\text{-P}_4\text{Mes}_2)][\text{TEF}]$  ( $\text{C}_{51}\text{H}_{51}\text{O}_4\text{F}_{36}\text{AlP}_4\text{Ni}$ ): C: 37.77 H: 3.17  
found (%): C: 38.05 H: 3.08

ESI(+)-MS (*o*-DFB):  $m/z$  (%) = 653.2 (100%)  $[\text{Cp}^{\text{***}}\text{Ni}(\eta^3\text{-P}_4\text{Mes}_2)]^+$

NMR ( $\text{CD}_2\text{Cl}_2$ , 298 K):  $^1\text{H}$ :  $\delta$ ppm = 1.14 (s, 9 H,  $\text{C}(\text{CH}_3)_3$ ), 1.29 (s, 18 H,  $\text{C}(\text{CH}_3)_3$ ), 2.32 (s, 6 H, Me), 2.64 (s, 6 H, Me), 2.73 (s, 6 H, Me), 5.92 (d,  $^4J = 1.4$  Hz, 2 H,  $\text{C}_5\text{H}_2\text{Bu}_3$ ), 6.98 (d,  $^4J = 4.2$  Hz, 2 H, Mes), 7.01 (d,  $^4J = 4.6$  Hz, 2 H, Mes)  
 $^{31}\text{P}\{\text{H}\}$ : (AMXX' spin system)  $\delta$ ppm = -3.1 (t,  $^1J_{\text{P}_X\text{-PA/PA}'} = 267.7$  Hz, 1 P,  $\text{P}^{\text{X}}$ ), 45.6 (t,  $^1J_{\text{P}_M\text{-PA/PA}'} = 294.8$  Hz, 1 P,  $\text{P}^{\text{M}}$ ), 103.7 (dd,  $^1J_{\text{PA/PA}'}\text{-PX} = 267.7$  Hz,  $^1J_{\text{PA/PA}'}\text{-PM} = 294.8$  Hz, 2 P,  $\text{P}^{\text{A/A}'}$ )  
 $^{31}\text{P}\{\text{H}\}$ : (AMXX' spin system)  $\delta$ ppm = -3.1 (t,  $^1J_{\text{P}_X\text{-PA/PA}'} = 267.7$  Hz, 1 P,  $\text{P}^{\text{X}}$ ), 45.6 (t,  $^1J_{\text{P}_M\text{-PA/PA}'} = 294.8$  Hz, 1 P,  $\text{P}^{\text{M}}$ ), 103.7 (dd,  $^1J_{\text{PA/PA}'}\text{-PX} = 267.7$  Hz,  $^1J_{\text{PA/PA}'}\text{-PM} = 294.8$  Hz, 2 P,  $\text{P}^{\text{A/A}'}$ )  
 $^{19}\text{F}\{\text{H}\}$ :  $\delta$ ppm = -75.62 (s, [TEF] $^-$ )

### $[\text{Cp}^{\text{***}}\text{Ni}(\eta^3\text{-P}_4\text{Cy}_2)][\text{GaCl}_4]$ (**2c**[GaCl<sub>4</sub>])

A colourless solution of  $\text{GaCl}_3$  (0.1 mmol, 18 mg, 1 eq.) in 4 mL of *o*-DFB was added to an orange solution of **1** (0.1 mmol, 38 mg, 1 eq.) and  $\text{Cy}_2\text{PCl}$  (0.1 mmol, 23 mg, 22  $\mu\text{L}$ , 1 eq.) in 3 mL of *o*-DFB at room temperature. A rapid colour change to red occurred. After stirring for 6 h at room temperature the solvent was removed *in vacuo* and the oily red residue was washed three times with 10 mL of *n*-hexane, each. Drying under reduced pressure ( $10^{-3}$  mbar) lead to solidification of the product  $[\text{Cp}^{\text{***}}\text{Ni}(\eta^3\text{-P}_4\text{Cy}_2)][\text{GaCl}_4]$  (**2c**[GaCl<sub>4</sub>]), which was then recrystallised from *o*-DFB/*n*-hexane (1:8) at  $-30$  °C to give dark red crystals of X-ray analysis quality after two weeks.

Yield: 47 mg (0.059 mmol, 59%)

Elemental analysis: calc. (%) for  $[\text{Cp}^{\text{***}}\text{Ni}(\eta^3\text{-P}_4\text{Cy}_2)][\text{GaCl}_4] \cdot (\text{C}_6\text{H}_4\text{F}_2)_{0.2}$  ( $\text{C}_{30.2}\text{H}_{51.8}\text{P}_4\text{Cl}_4\text{NiGa}$ ): C: 44.42 H: 6.39  
found (%): C: 44.38 H: 6.12

ESI(+)-MS (*o*-DFB):  $m/z$  (%) = 581.2 (100%)  $[\text{Cp}^{\text{***}}\text{Ni}(\eta^3\text{-P}_4\text{Cy}_2)]^+$

NMR ( $\text{CD}_2\text{Cl}_2$ , 298 K):  $^1\text{H}$ :  $\delta$ ppm = 1.26 – 2.56 (several broad multiplets, 22 H, Cy), 1.29 (s, 9 H,  $\text{C}(\text{CH}_3)_3$ ), 1.45 (s, 18 H,  $\text{C}(\text{CH}_3)_3$ ), 5.92 (d,  $^4J = 1.4$  Hz, 2 H,  $\text{C}_5\text{H}_2\text{Bu}_3$ )  
 $^{31}\text{P}\{\text{H}\}$ : (AMXX' spin system)  $\delta$ ppm = 35.0 (m,  $^1J_{\text{P}_X\text{-PM}} = 270.9$  Hz,  $^1J_{\text{P}_X\text{-PM}} = 261.8$  Hz,  $^1J_{\text{P}_X\text{-PA}} = 286.6$  Hz,  $^1J_{\text{P}_X\text{-PA}} = 296.7$  Hz,  $^2J_{\text{P}_X\text{-PX}'} = 22.7$  Hz, 2 P,  $\text{P}^{\text{X/X}'}$ ), 48.5 (ddd,  $^1J_{\text{P}_M\text{-PX}} = 270.9$  Hz,  $^1J_{\text{P}_M\text{-PX}} = 261.8$  Hz,  $^2J_{\text{P}_M\text{-PA}} = 12.3$  Hz, 1 P,  $\text{P}^{\text{M}}$ ), 84.3 (ddd,  $^1J_{\text{PA-PX}} = 286.6$  Hz,  $^1J_{\text{PA-PX}'} = 296.7$  Hz,  $^2J_{\text{PA-PM}} = 12.3$  Hz, 1 P,  $\text{P}^{\text{A}}$ )  
 $^{31}\text{P}$ : (AMXX' spin system)  $\delta$ ppm = 35.0 (m,  $^1J_{\text{P}_X\text{-PM}} = 270.9$  Hz,  $^1J_{\text{P}_X\text{-PM}} = 261.8$  Hz,  $^1J_{\text{P}_X\text{-PM}} = 286.6$  Hz,  $^1J_{\text{P}_X\text{-PA}} = 296.7$  Hz,  $^2J_{\text{P}_X\text{-PX}'} = 22.7$  Hz, 2 P,  $\text{P}^{\text{X/X}'}$ ), 48.5 (m, 1 P,  $\text{P}^{\text{M}}$ ), 84.3 (ddd,  $^1J_{\text{PA-PX}} = 286.6$  Hz,  $^1J_{\text{PA-PX}'} = 296.7$  Hz,  $^2J_{\text{PA-PM}} = 12.3$  Hz, 1 P,  $\text{P}^{\text{A}}$ )

### $[\text{Cp}^{\text{***}}\text{Ni}(\eta^3\text{-P}_4\text{Cy}_2)][\text{TEF}]$ (**2c**[TEF])

A colourless solution of  $\text{Ti}[\text{TEF}]$  (0.1 mmol, 117 mg, 1 eq.) in 2 mL of *o*-DFB was added to an orange solution of **1** (0.1 mmol, 38 mg, 1 eq.) and  $\text{Cy}_2\text{PCl}$  (0.1 mmol, 23 mg, 22  $\mu\text{L}$ , 1 eq.) in 3 mL of *o*-DFB at room temperature. A rapid colour change to red occurred and formation of white solid could be observed. After stirring for 24 h at room temperature, the mixture was filtered, and the solvent removed *in vacuo*. The oily red residue was dissolved in 3 mL of  $\text{CH}_2\text{Cl}_2$ , precipitated with 30 mL of *n*-hexane and washed three times with 10 mL of *n*-hexane, each. Drying under reduced pressure ( $10^{-3}$  mbar) lead to solidification of the product  $[\text{Cp}^{\text{***}}\text{Ni}(\eta^3\text{-P}_4\text{Cy}_2)][\text{TEF}]$  (**2c**[TEF]), which was isolated as an orange to red powder. All attempts to recrystallise the product ended in the formation of red oil at the bottom of the flask.

Yield: 88 mg (0.057 mmol, 57%)

Elemental analysis: calc. (%) for  $[\text{Cp}^{\text{***}}\text{Ni}(\eta^3\text{-P}_4\text{Cy}_2)][\text{TEF}]$  ( $\text{C}_{45}\text{H}_{51}\text{O}_4\text{F}_{36}\text{AlP}_4\text{Ni}$ ): C: 35.16 H: 2.56  
found (%): C: 35.04 H: 3.06

ESI(+)-MS ( $\text{CH}_2\text{Cl}_2$ ):  $m/z$  (%) = 581.2 (100%)  $[\text{Cp}^{\text{***}}\text{Ni}(\eta^3\text{-P}_4\text{Cy}_2)]^+$

NMR ( $\text{CD}_2\text{Cl}_2$ , 298 K):  $^1\text{H}$ :  $\delta$ ppm = 1.26 – 2.56 (several broad multiplets, 22 H, Cy), 1.29 (s, 9 H,  $\text{C}(\text{CH}_3)_3$ ), 1.45 (s, 18 H,  $\text{C}(\text{CH}_3)_3$ ), 5.92 (d,  $^4J = 1.4$  Hz, 2 H,  $\text{C}_5\text{H}_2\text{Bu}_3$ )  
 $^{31}\text{P}\{\text{H}\}$ : (AMXX' spin system)  $\delta$ ppm = 35.0 (m,  $^1J_{\text{P}_X\text{-PM}} = 270.9$  Hz,  $^1J_{\text{P}_X\text{-PM}} = 261.8$  Hz,  $^1J_{\text{P}_X\text{-PA}} = 286.6$  Hz,  $^1J_{\text{P}_X\text{-PA}} = 296.7$  Hz,  $^2J_{\text{P}_X\text{-PX}'} = 22.7$  Hz, 2 P,  $\text{P}^{\text{X/X}'}$ ), 48.5 (ddd,  $^1J_{\text{P}_M\text{-PX}} = 270.9$  Hz,  $^1J_{\text{P}_M\text{-PX}} = 261.8$  Hz,  $^2J_{\text{P}_M\text{-PA}} = 12.3$  Hz, 1 P,  $\text{P}^{\text{M}}$ ), 84.3 (ddd,  $^1J_{\text{PA-PX}} = 286.6$  Hz,  $^1J_{\text{PA-PX}'} = 296.7$  Hz,  $^2J_{\text{PA-PM}} = 12.3$  Hz, 1 P,  $\text{P}^{\text{A}}$ )  
 $^{31}\text{P}$ : (AMXX' spin system)  $\delta$ ppm = 35.0 (m,  $^1J_{\text{P}_X\text{-PM}} = 270.9$  Hz,  $^1J_{\text{P}_X\text{-PM}} = 261.8$  Hz,  $^1J_{\text{P}_X\text{-PM}} = 286.6$  Hz,  $^1J_{\text{P}_X\text{-PA}} = 296.7$  Hz,  $^2J_{\text{P}_X\text{-PX}'} = 22.7$  Hz, 2 P,  $\text{P}^{\text{X/X}'}$ ), 48.5 (m, 1 P,  $\text{P}^{\text{M}}$ ), 84.3 (ddd,  $^1J_{\text{PA-PX}} = 286.6$  Hz,  $^1J_{\text{PA-PX}'} = 296.7$  Hz,  $^2J_{\text{PA-PM}} = 12.3$  Hz, 1 P,  $\text{P}^{\text{A}}$ )  
 $^{19}\text{F}\{\text{H}\}$ :  $\delta$ ppm = -75.62 (s, [TEF] $^-$ )

### $[\text{Cp}^{\text{***}}\text{Ni}(\eta^3\text{-P}_4\text{biphen})][\text{GaCl}_4]$ (**2d**[GaCl<sub>4</sub>])

A colourless solution of  $\text{GaCl}_3$  (0.1 mmol, 18 mg, 1 eq.) in 4 mL of  $\text{CH}_2\text{Cl}_2$  was added to an orange solution of **1** (0.1 mmol, 38 mg, 1 eq.) and biphen $\text{PCl}$  (0.1 mmol, 22 mg, 1 eq.) in 3 mL of  $\text{CH}_2\text{Cl}_2$  at room temperature. Rapid colour change to dark red occurred. After

## SUPPORTING INFORMATION

stirring the solution for 1.5 h, it was constrained to a total of 4 mL, layered with 20 mL of *n*-hexane, and stored at  $-30\text{ }^{\circ}\text{C}$ . After one week, formation of red microcrystalline  $[\text{Cp}^{\text{***}}\text{Ni}(\eta^3\text{-P}_4\text{biphen})][\text{GaCl}_4]$  (**2d** $[\text{GaCl}_4]$ ) could be observed. Recrystallisation from  $\text{CH}_2\text{Cl}_2/n$ -hexane (1:5) at  $-30\text{ }^{\circ}\text{C}$  yielded light red crystals of X-ray quality after two weeks.

Yield: 55 mg (0.07 mmol, 70 %)  
 Elemental analysis: calc. (%) for  $[\text{Cp}^{\text{***}}\text{Ni}(\eta^3\text{-P}_4\text{biphen})][\text{GaCl}_4]\cdot(\text{C}_6\text{H}_{14})_{0.6}$  ( $\text{C}_{32.6}\text{H}_{45.4}\text{P}_4\text{Cl}_4\text{NiGa}$ ): C: 47.09 H: 5.50  
 found (%): C: 47.56 H: 5.11  
 ESI(+) MS (*o*-DFB):  $m/z$  (%) = 567.1 (100%)  $[\text{Cp}^{\text{***}}\text{Ni}(\eta^3\text{-P}_4\text{biphen})]^+$ , 895.2 (8%)  $[(\text{Cp}^{\text{***}}\text{Ni})(\mu_3\eta^3\eta^1\eta^1\text{-P}_4\text{biphenCl})]^+$   
 NMR ( $\text{CD}_2\text{Cl}_2$ , 298 K):  $^1\text{H}$ :  $\delta$ ppm = 1.36 (s, 9 H,  $\text{C}(\text{CH}_3)_3$ ), 1.52 (s, 18 H,  $\text{C}(\text{CH}_3)_3$ ), 6.25 (d,  $^4J_{\text{H-H}} = 1.5$  Hz, 2 H,  $\text{C}_5\text{H}_2\text{Bu}_3$ ), 7.72 (m, 2 H, biphen), 7.83 (m, 2 H, biphen), 7.96 (m, 2 H, biphen), 8.28 (m, 2 H, biphen)  
 $^{31}\text{P}\{^1\text{H}\}$ : (AA'MX spin system)  $\delta$ ppm = 17.1 (m,  $^1J_{\text{P-X-PA}} = 292.8$  Hz,  $^1J_{\text{P-X-PA}'} = 274.2$  Hz,  $^2J_{\text{P-X-PM}} = 24.8$  Hz, 1 P, P<sup>X</sup>), 63.8 (m,  $^1J_{\text{PM-PA}} = 277.2$  Hz,  $^1J_{\text{PM-PA}'} = 282.5$  Hz,  $^2J_{\text{PM-PX}} = 24.8$  Hz, 1 P, P<sup>M</sup>), 70.0 (m,  $^1J_{\text{PA-PX}} = 292.8$  Hz,  $^1J_{\text{PA}'-PX} = 274.2$  Hz,  $^1J_{\text{PA-PM}} = 277.2$  Hz,  $^1J_{\text{PA}'-PM} = 282.5$  Hz, 2 P, P<sup>A/A'}</sup>)  
 $^{31}\text{P}$ : (AA'MX spin system)  $\delta$ ppm = 17.1 (t,  $^1J_{\text{P-X-PA/A}'} = 282.4$  Hz, 1 P, P<sup>X</sup>), 63.8 (m,  $^1J_{\text{PM-PA}} = 277.2$  Hz,  $^1J_{\text{PM-PA}'} = 282.5$  Hz,  $^2J_{\text{PM-PX}} = 24.8$  Hz, 1 P, P<sup>M</sup>), 70.0 (m,  $^1J_{\text{PA-PX}} = 292.8$  Hz,  $^1J_{\text{PA}'-PX} = 274.2$  Hz,  $^1J_{\text{PA-PM}} = 277.2$  Hz,  $^1J_{\text{PA}'-PM} = 282.5$  Hz, 2 P, P<sup>A/A'}</sup>)

### $[\text{Cp}^{\text{***}}\text{Ni}(\eta^3\text{-P}_4\text{biphen})][\text{TEF}]$ (**2d** $[\text{TEF}]$ )

A colourless solution of  $\text{Ti}[\text{TEF}]$  (0.1 mmol, 117 mg, 1 eq.) in 2 mL of *o*-DFB was added to an orange solution of **1** (0.1 mmol, 38 mg, 1 eq.) and biphen $\text{P}(\text{Cl})$  (0.1 mmol, 22 mg, 1 eq.) in 3 mL of *o*-DFB at room temperature. A rapid colour change to dark red occurred and formation of white solid could be observed. After stirring for 24 h at room temperature, the mixture was filtered, and the solvent removed *in vacuo*. The dark red residue was washed three times with 10 mL of *n*-hexane, each, and then dried under reduced pressure ( $10^{-3}$  mbar) to yield  $[\text{Cp}^{\text{***}}\text{Ni}(\eta^3\text{-P}_4\text{biphen})][\text{TEF}]$  (**2d** $[\text{TEF}]$ ) as an orange to red powder.

Yield: 84 mg (0.055 mmol, 55%)  
 Elemental analysis: calc. (%) for  $[\text{Cp}^{\text{***}}\text{Ni}(\eta^3\text{-P}_4\text{biphen})][\text{TEF}]$  ( $\text{C}_{45}\text{H}_{37}\text{O}_4\text{F}_{36}\text{AlP}_4\text{Ni}$ ): C: 35.20 H: 2.43  
 found (%): C: 35.02 H: 2.47  
 ESI(+) MS ( $\text{CH}_2\text{Cl}_2$ ):  $m/z$  (%) = 567.1 (100%)  $[\text{Cp}^{\text{***}}\text{Ni}(\eta^3\text{-P}_4\text{biphen})]^+$   
 NMR ( $\text{CD}_2\text{Cl}_2$ , 298 K):  $^1\text{H}$ :  $\delta$ ppm = 1.36 (s, 9 H,  $\text{C}(\text{CH}_3)_3$ ), 1.52 (s, 18 H,  $\text{C}(\text{CH}_3)_3$ ), 6.25 (d,  $^4J_{\text{H-H}} = 1.5$  Hz, 2 H,  $\text{C}_5\text{H}_2\text{Bu}_3$ ), 7.72 (m, 2 H, biphen), 7.83 (m, 2 H, biphen), 7.96 (m, 2 H, biphen), 8.28 (m, 2 H, biphen)  
 $^{31}\text{P}\{^1\text{H}\}$ : (AA'MX spin system)  $\delta$ ppm = 17.1 (m,  $^1J_{\text{P-X-PA}} = 292.8$  Hz,  $^1J_{\text{P-X-PA}'} = 274.2$  Hz,  $^2J_{\text{P-X-PM}} = 24.8$  Hz, 1 P, P<sup>X</sup>), 63.8 (m,  $^1J_{\text{PM-PA}} = 277.2$  Hz,  $^1J_{\text{PM-PA}'} = 282.5$  Hz,  $^2J_{\text{PM-PX}} = 24.8$  Hz, 1 P, P<sup>M</sup>), 70.0 (m,  $^1J_{\text{PA-PX}} = 292.8$  Hz,  $^1J_{\text{PA}'-PX} = 274.2$  Hz,  $^1J_{\text{PA-PM}} = 277.2$  Hz,  $^1J_{\text{PA}'-PM} = 282.5$  Hz, 2 P, P<sup>A/A'}</sup>)  
 $^{31}\text{P}$ : (AA'MX spin system)  $\delta$ ppm = 17.1 (t,  $^1J_{\text{P-X-PA/A}'} = 282.4$  Hz, 1 P, P<sup>X</sup>), 63.8 (m,  $^1J_{\text{PM-PA}} = 277.2$  Hz,  $^1J_{\text{PM-PA}'} = 282.5$  Hz,  $^2J_{\text{PM-PX}} = 24.8$  Hz, 1 P, P<sup>M</sup>), 70.0 (m,  $^1J_{\text{PA-PX}} = 292.8$  Hz,  $^1J_{\text{PA}'-PX} = 274.2$  Hz,  $^1J_{\text{PA-PM}} = 277.2$  Hz,  $^1J_{\text{PA}'-PM} = 282.5$  Hz, 2 P, P<sup>A/A'}</sup>)  
 $^{19}\text{F}\{^1\text{H}\}$ :  $\delta$ ppm =  $-75.54$  (s,  $[\text{TEF}]^-$ )

### $[\text{Cp}^{\text{***}}\text{Ni}(\eta^3\text{-P}_4\text{Me}_2)][\text{TEF}]$ (**2e** $[\text{TEF}]$ )

A colourless solution of  $\text{Ti}[\text{TEF}]$  (0.1 mmol, 117 mg, 1 eq.) in 2 mL of *o*-DFB was added to an orange solution of **1** (0.1 mmol, 38 mg, 1 eq.) and  $\text{Me}_2\text{P}(\text{Cl})$  (0.1 mmol, 10 mg, 10  $\mu\text{L}$ , 1 eq.) in 3 mL of *o*-DFB at room temperature. A rapid colour change to red occurred and formation of white solid could be observed. After stirring for 24 h at room temperature, the mixture was filtered, and the solvent removed *in vacuo*. The oily red residue was washed three times with 10 mL of *n*-hexane, each. Drying under reduced pressure ( $10^{-3}$  mbar) lead to solidification. Recrystallisation from *o*-DFB/*n*-hexane (1:10) at  $4\text{ }^{\circ}\text{C}$  gave  $[\text{Cp}^{\text{***}}\text{Ni}(\eta^3\text{-P}_4\text{Me}_2)][\text{TEF}]$  (**2e** $[\text{TEF}]$ ) as a single crystalline material after 10 days.

Yield: 73 mg (0.052 mmol, 52%)  
 Elemental analysis: calc. (%) for  $[\text{Cp}^{\text{***}}\text{Ni}(\eta^3\text{-P}_4\text{Me}_2)][\text{TEF}]$  ( $\text{C}_{35}\text{H}_{35}\text{O}_4\text{F}_{36}\text{AlP}_4\text{Ni}$ ): C: 29.74 H: 2.50  
 found (%): C: 29.95 H: 2.42  
 ESI(+) MS ( $\text{CH}_2\text{Cl}_2$ ):  $m/z$  (%) = 445.1 (100%)  $[\text{Cp}^{\text{***}}\text{Ni}(\eta^3\text{-P}_4\text{Me}_2)]^+$   
 NMR ( $\text{CD}_2\text{Cl}_2$ , 298 K):  $^1\text{H}$ :  $\delta$ ppm = 1.30 (s, 9 H,  $\text{C}(\text{CH}_3)_3$ ), 1.44 (s, 18 H,  $\text{C}(\text{CH}_3)_3$ ), 2.01 (d,  $^2J_{\text{HP}} = 12.2$  Hz, 3 H, Me), 2.30 (d,  $^2J_{\text{HP}} = 12.4$  Hz, 3 H, Me), 5.96 (s, 2 H,  $\text{C}_5\text{H}_2\text{Bu}_3$ )  
 $^{31}\text{P}\{^1\text{H}\}$ : (AMM'X spin system)  $\delta$ ppm = 14.7 (ddd,  $^1J_{\text{P-X-PM}} = 257.1$  Hz,  $^1J_{\text{P-X-PM}'} = 255.4$  Hz,  $^2J_{\text{P-X-PA}} = 18.6$  Hz, 1 P, P<sup>X</sup>), 64.0 (m,  $^1J_{\text{PM-PX}} = 257.1$  Hz,  $^1J_{\text{PM}'-PX} = 255.4$  Hz,  $^1J_{\text{PM-PA}} = 295.4$  Hz,  $^1J_{\text{PM}'-PA} = 279.5$  Hz, 2 P, P<sup>MM'}</sup>), 83.5 (ddd,  $^1J_{\text{PA-PM}} = 295.4$  Hz,  $^1J_{\text{PA-PM}'} = 279.5$  Hz,  $^2J_{\text{PA-PX}} = 18.6$  Hz, 1 P, P<sup>A</sup>)  
 $^{31}\text{P}$ : (AMM'X spin system)  $\delta$ ppm = 14.7 (m, 1 P, P<sup>X</sup>), 64.0 (m,  $^1J_{\text{PM-PX}} = 257.1$  Hz,  $^1J_{\text{PM}'-PX} = 255.4$  Hz,  $^1J_{\text{PM-PA}} = 295.4$  Hz,  $^1J_{\text{PM}'-PA} = 279.5$  Hz, 2 P, P<sup>MM'}</sup>), 83.5 (ddd,  $^1J_{\text{PA-PM}} = 295.4$  Hz,  $^1J_{\text{PA-PM}'} = 279.5$  Hz,  $^2J_{\text{PA-PX}} = 18.6$  Hz, 1 P, P<sup>A</sup>)  
 $^{19}\text{F}\{^1\text{H}\}$ :  $\delta$ ppm =  $-75.60$  (s,  $[\text{TEF}]^-$ )



## SUPPORTING INFORMATION

**[Cp<sup>'''</sup>Ni(η<sup>3</sup>-P<sub>4</sub>PhCl)]][TEF] (2f[TEF])**

A colourless solution of Ti[TEF] (0.1 mmol, 117 mg, 1 eq.) in 2 mL of *o*-DFB was added to an orange solution of **1** (0.1 mmol, 38 mg, 1 eq.) and PhPCl<sub>2</sub> (0.1 mmol, 18 mg, 14 μL, 1 eq.) in 3 mL of *o*-DFB at room temperature. A rapid colour change to dark red occurred and formation of white solid could be observed. After stirring for 20 h at room temperature, the mixture was filtered, and the solvent removed *in vacuo*. The oily red residue was washed three times with 10 mL of *n*-hexane, each. Drying under reduced pressure (10<sup>-3</sup> mbar) lead to formation of [Cp<sup>'''</sup>Ni(η<sup>3</sup>-P<sub>4</sub>CiPh)]][TEF] (**2f**[TEF]) as a brownish red solid. NMR spectroscopy studies revealed that **2f**[TEF] is formed in two isomeric forms, *endo*-Ph and *exo*-Ph, respectively. According to the <sup>1</sup>H and <sup>31</sup>P NMR spectrum the two isomers are formed in a ratio of 1:7. Crystals of the *endo*-Ph isomer of **2f**[TEF] could be obtained in X-ray analysis quality, by recrystallisation from *o*-DFB/*n*-hexane (1:6) at 4 °C for two weeks.

Yield: 93 mg (0.06 mmol, 60%)  
 Elemental analysis: calc. (%) for [Cp<sup>'''</sup>Ni(η<sup>3</sup>-P<sub>4</sub>Me<sub>2</sub>)]][TEF]·(C<sub>6</sub>H<sub>4</sub>F<sub>2</sub>)<sub>0.6</sub> (C<sub>42.6</sub>H<sub>36.4</sub>O<sub>4</sub>F<sub>37.2</sub>AlP<sub>4</sub>Ni): C: 32.72 H: 2.35  
 found (%): C: 32.89 H: 2.52 (Signals for C<sub>6</sub>H<sub>4</sub>F<sub>2</sub> are also found in the <sup>1</sup>H NMR of the isolated product)  
 ESI(+)-MS (*o*-DFB): *m/z* (%) = 527.1 (100%) [Cp<sup>'''</sup>Ni(η<sup>3</sup>-P<sub>4</sub>PhCl)]<sup>+</sup>  
 NMR (CD<sub>2</sub>Cl<sub>2</sub>, 298 K): <sup>1</sup>H: δppm = 1.21 (s, 9 H, C(CH<sub>3</sub>)<sub>3</sub> (**2f**<sup>+</sup>*exo*)), 1.29 (s, 18 H, C(CH<sub>3</sub>)<sub>3</sub> (**2f**<sup>+</sup>*exo*)), 1.39 (s, 9 H, C(CH<sub>3</sub>)<sub>3</sub> (**2f**<sup>+</sup>*endo*)), 1.49 (s, 18 H, C(CH<sub>3</sub>)<sub>3</sub> (**2f**<sup>+</sup>*endo*)), 5.91 (d, <sup>4</sup>J<sub>H-H</sub> = 2.7 Hz, 2 H, C<sub>5</sub>H<sub>2</sub>BU<sub>3</sub> (**2f**<sup>+</sup>*exo*)), 6.05 (s, 2 H, C<sub>5</sub>H<sub>2</sub>BU<sub>3</sub> (**2f**<sup>+</sup>*endo*)), 7.73 (m, 2.3 H, Ph (**2f**<sup>+</sup>)), 7.81 (m, 1.1 H, Ph (**2f**<sup>+</sup>)), 7.9 – 8.0 (m, 2.3 H, Ph (**2f**<sup>+</sup>)), **2f**<sup>+</sup>*endo*: **2f**<sup>+</sup>*exo* = 7:1  
<sup>31</sup>P{<sup>1</sup>H}: (two AA'MX spin systems) δppm = 34.3 (ddd, <sup>1</sup>J<sub>PX-PA</sub> = 274.1 Hz, <sup>1</sup>J<sub>PX-PA'</sub> = 273.6 Hz, <sup>2</sup>J<sub>PX-PM</sub> = 36.8 Hz, 1 P, P<sup>X</sup> (**2f**<sup>+</sup>*endo*)), 42.3 (ddd, <sup>1</sup>J<sub>PX-PA</sub> = 331.1 Hz, <sup>1</sup>J<sub>PX-PA'</sub> = 330.2 Hz, <sup>2</sup>J<sub>PX-PM</sub> = 18.7 Hz, 1 P, P<sup>X</sup> (**2f**<sup>+</sup>*exo*)), 59.5 (ddd, <sup>1</sup>J<sub>PM-PA</sub> = 346.4 Hz, <sup>1</sup>J<sub>PM-PA'</sub> = 338.5 Hz, <sup>2</sup>J<sub>PM-PX</sub> = 36.8 Hz, 1 P, P<sup>M</sup> (**2f**<sup>+</sup>*endo*)), 73.9 (ddd, <sup>1</sup>J<sub>PM-PA</sub> = 285.0 Hz, <sup>1</sup>J<sub>PM-PA'</sub> = 282.3 Hz, <sup>2</sup>J<sub>PM-PX</sub> = 18.7 Hz, 1 P, P<sup>M</sup> (**2f**<sup>+</sup>*exo*)), 94.1 (m, <sup>1</sup>J<sub>PA-PX</sub> = 331.1 Hz, <sup>1</sup>J<sub>PA'-PX</sub> = 330.2 Hz, <sup>1</sup>J<sub>PA-PM</sub> = 285.0 Hz, <sup>1</sup>J<sub>PA'-PM</sub> = 282.3 Hz, 2 P, P<sup>A/A'</sup> (**2f**<sup>+</sup>*exo*)), 113.5 (ddd, <sup>1</sup>J<sub>PA-PM</sub> = 346.4 Hz, <sup>1</sup>J<sub>PA'-PM</sub> = 338.5 Hz, <sup>1</sup>J<sub>P2-PX</sub> = 274.1 Hz, <sup>1</sup>J<sub>P4-PX</sub> = 273.6 Hz, 2 P, P<sup>A/A'</sup> (**2f**<sup>+</sup>*endo*))  
<sup>31</sup>P: (two AA'MX spin systems) δppm = 34.3 (ddd, <sup>1</sup>J<sub>PX-PA</sub> = 274.1 Hz, <sup>1</sup>J<sub>PX-PA'</sub> = 273.6 Hz, <sup>2</sup>J<sub>PX-PM</sub> = 36.8 Hz, 1 P, P<sup>X</sup> (**2f**<sup>+</sup>*endo*)), 42.3 (t (broad), <sup>1</sup>J<sub>P-P</sub> = 339.8 Hz, 1 P, P<sup>X</sup> (**2f**<sup>+</sup>*exo*)), 59.5 (t (broad), <sup>1</sup>J<sub>P-P</sub> = 342.4 Hz, 1 P, P<sup>M</sup> (**2f**<sup>+</sup>*endo*)), 73.9 (ddd, <sup>1</sup>J<sub>PM-PA</sub> = 285.0 Hz, <sup>1</sup>J<sub>PM-PA'</sub> = 282.3 Hz, <sup>2</sup>J<sub>PM-PX</sub> = 18.7 Hz, 1 P, P<sup>M</sup> (**2f**<sup>+</sup>*exo*)), 94.1 (m, <sup>1</sup>J<sub>PA-PX</sub> = 331.1 Hz, <sup>1</sup>J<sub>PA'-PX</sub> = 330.2 Hz, <sup>1</sup>J<sub>PA-PM</sub> = 285.0 Hz, <sup>1</sup>J<sub>PA'-PM</sub> = 282.3 Hz, 2 P, P<sup>A/A'</sup> (**2f**<sup>+</sup>*exo*)), 113.5 (ddd, <sup>1</sup>J<sub>PA-PM</sub> = 346.4 Hz, <sup>1</sup>J<sub>PA'-PM</sub> = 338.5 Hz, <sup>1</sup>J<sub>PA-PX</sub> = 274.1 Hz, <sup>1</sup>J<sub>PA'-PX</sub> = 273.6 Hz, 2 P, P<sup>A/A'</sup> (**2f**<sup>+</sup>*endo*)),  
 Integration: **2f**<sup>+</sup>*endo*: **2f**<sup>+</sup>*exo* = 7:1  
<sup>19</sup>F{<sup>1</sup>H}: δppm = -75.57 (s, [TEF]<sup>-</sup>)

**[Cp<sup>'''</sup>Ni(η<sup>3</sup>-P<sub>4</sub>BuCl)]][TEF] (2g[TEF])**

A colourless solution of Ti[TEF] (0.1 mmol, 117 mg, 1 eq.) in 2 mL of *o*-DFB was added to an orange solution of **1** (0.1 mmol, 38 mg, 1 eq.) and <sup>t</sup>BuPCl<sub>2</sub> (0.1 mmol, 16 mg, 1 eq.) in 3 mL of *o*-DFB at room temperature. Precipitation of white solid and a colour change to red could be observed within one hour. Stirring for 20 h lead to darkening of the mixture. The solution was then filtered of the white solid, and the solvent removed *in vacuo*. The dark red to brown precipitate was washed three times with 10 mL of *n*-hexane, each. After drying under vacuum (10<sup>-3</sup> mbar) [Cp<sup>'''</sup>Ni(η<sup>3</sup>-P<sub>4</sub>Ci<sup>t</sup>Bu)]][TEF] (**2g**[TEF]) could be isolated as a brown powder.

Yield: 74 mg (0.05 mmol, 50%)  
 Elemental analysis: calc. (%) for [Cp<sup>'''</sup>Ni(η<sup>3</sup>-P<sub>4</sub><sup>t</sup>BuCl)]][TEF]·(C<sub>6</sub>H<sub>4</sub>F<sub>2</sub>)<sub>0.4</sub> (C<sub>39.4</sub>H<sub>39.6</sub>O<sub>4</sub>F<sub>36.8</sub>AlP<sub>4</sub>CiNi): C: 31.11 H: 2.63  
 found (%): C: 31.01 H: 2.50 (Signals for C<sub>6</sub>H<sub>4</sub>F<sub>2</sub> are also found in the <sup>1</sup>H NMR of the isolated product)  
 ESI(+)-MS (*o*-DFB): *m/z* (%) = 507.1 (100%) [Cp<sup>'''</sup>Ni(η<sup>3</sup>-P<sub>4</sub><sup>t</sup>BuCl)]<sup>+</sup>  
 NMR (CD<sub>2</sub>Cl<sub>2</sub>, 298 K): <sup>1</sup>H: δppm = 1.32 (s, 9 H, C(CH<sub>3</sub>)<sub>3</sub>), 1.46 (s, 18 H, C(CH<sub>3</sub>)<sub>3</sub>), 1.47 (d, <sup>3</sup>J<sub>PH</sub> = 22.0 Hz, 9 H, <sup>t</sup>Bu), 6.01 (s, 2 H, C<sub>5</sub>H<sub>2</sub>BU<sub>3</sub>)  
<sup>31</sup>P{<sup>1</sup>H}: δppm = 57.1 (ddd, <sup>1</sup>J<sub>PX-PM</sub> = 288.6 Hz, <sup>1</sup>J<sub>PX-PM'</sub> = 270.0 Hz, <sup>2</sup>J<sub>PX-PA</sub> = 41.9 Hz, 1 P, P<sup>X</sup>), 85.9 (ddd, <sup>1</sup>J<sub>PM-PA</sub> = 357.9 Hz, <sup>1</sup>J<sub>PM-PA'</sub> = 324.8 Hz, <sup>1</sup>J<sub>PM-PX</sub> = 288.6 Hz, <sup>1</sup>J<sub>PM'-PX</sub> = 270.0 Hz, 2 P, P<sup>M/M'</sup>), 107.2 (ddd, <sup>1</sup>J<sub>PA-PM</sub> = 357.9 Hz, <sup>1</sup>J<sub>PA-PM'</sub> = 324.8 Hz, <sup>2</sup>J<sub>PA-PX</sub> = 41.9 Hz, 1 P, P<sup>A</sup>)  
<sup>31</sup>P: δppm = 57.1 (ddd, <sup>1</sup>J<sub>PX-PM</sub> = 288.6 Hz, <sup>1</sup>J<sub>PX-PM'</sub> = 270.0 Hz, <sup>2</sup>J<sub>PX-PA</sub> = 41.9 Hz, 1 P, P<sup>X</sup>), 85.9 (ddd, <sup>1</sup>J<sub>PM-PA</sub> = 357.9 Hz, <sup>1</sup>J<sub>PM-PA'</sub> = 324.8 Hz, <sup>1</sup>J<sub>PM-PX</sub> = 288.6 Hz, <sup>1</sup>J<sub>PM'-PX</sub> = 270.0 Hz, 2 P, P<sup>M/M'</sup>), 107.2 (br, 1 P, P<sup>A</sup>)  
<sup>19</sup>F{<sup>1</sup>H}: δppm = -75.60 (s, [TEF]<sup>-</sup>)

**[(Cp<sup>'''</sup>Ni)<sub>2</sub>(μ;η<sup>3</sup>:η<sup>1</sup>:η<sup>1</sup>-P<sub>4</sub>Br<sub>3</sub>)]][TEF] (3a[TEF])**

Addition of a solution of Ti[TEF] (0.1 mmol, 117 mg, 1 eq.) in 3 mL of CH<sub>2</sub>Cl<sub>2</sub> to a solution of **1** (0.1 mmol, 38 mg, 1 eq.) and PBr<sub>3</sub> (0.1 mmol, 27 mg, 10 μL, 1 eq.) in 4 mL of CH<sub>2</sub>Cl<sub>2</sub> at -80 °C lead to an immediate colour change to dark red and the precipitation of white solid. <sup>31</sup>P NMR spectra (*o*-DFB/tol-*d*<sup>8</sup> capillary, r. t., Figure SI 7) taken 1 h after the addition revealed the initial formation of



## SUPPORTING INFORMATION

$[(Cp^*Ni(\eta^3-P_4Br_2))][TEF]$  (**2h**[TEF]) besides  $P_4$  and the final product  $[(Cp^*Ni)_2(\mu;\eta^3:\eta^1:\eta^1-P_4Br_3)][TEF]$  (**3a**[TEF]). Attempts to isolate the intermediate **2h**[TEF] by filtration of the cold ( $-80^\circ C$ ) solution and washing three times with cold *n*-hexane (10 mL each,  $-80^\circ C$ ) failed. Isolated batches of (**2h**[TEF]) always carried impurities of the final product **3a**[TEF]. The latter was obtained, by letting the reaction mixture warm to room temperature overnight and stirring for three more days. The now dark brown mixture was filtered, and the solvent removed *in vacuo*. The brown precipitate was washed with 10 mL of *n*-hexane, each, and then dried under reduced pressure ( $10^{-3}$  mbar). Recrystallisation from  $CH_2Cl_2/n$ -hexane (1:6) at room temperature for six days yielded large blackish red crystals of **3a**[TEF] in X-ray quality. These crystals were washed with toluene, dried under reduced pressure and then isolated. Conducting the reaction in *o*-DFB, but only cooling to  $-30^\circ C$  yielded similar results.

Yield: 92 mg (0.048 mmol, 90% based on **1**)  
 Elemental analysis: calc. (%) for  $[(Cp^*Ni)_2(\mu;\eta^3:\eta^1:\eta^1-P_4Br_3)][TEF]\cdot(TiBr)_{0.5}$  ( $C_{50}H_{58}O_4F_{36}AlP_4Ni_2Br_{3.5}Ti_{0.5}$ ): C: 29.24 H: 2.85 found (%): C: 29.16 H: 2.56 (even after several filtration steps, TiBr precipitates after layering *o*-DFB solutions of the product and covers the surface of the crystals)  
 ESI(+)-MS (*o*-DFB):  $m/z$  (%) = 332.2 (100)  $[Cp^*Ni(H_3CCN)]^+$ , 373.2 (20)  $[Cp^*Ni(H_3CCN)_2]^+$ , 947.0 (5)  $[(Cp^*Ni)_2(\mu;\eta^3:\eta^1:\eta^1-P_4Br_3)]^+$ ; Acetonitrile molecules are from the purging solution of the diffractometer.  
 NMR ( $CD_2Cl_2$ , 298 K):  $^1H$ :  $\delta$ ppm = 1.25 (s, 9 H,  $C(CH_3)_3$ ), 1.41 (s, 9 H,  $C(CH_3)_3$ ), 1.42 (s, 9 H,  $C(CH_3)_3$ ), 1.46 (s, 18 H,  $C(CH_3)_3$ ), 1.48 (s, 9 H,  $C(CH_3)_3$ ), 4.91 (m, 1 H,  $C_5H_2^tBu_3$ ), 5.35 (m, 1 H,  $C_5H_2^tBu_3$ ), 5.43 (s, 1 H,  $C_5H_2^tBu_3$ ), 5.91 (s, 1 H,  $C_5H_2^tBu_3$ )  
 $^{31}P\{^1H\}$ : (AMNX spin system)  $\delta$ ppm =  $-1.1$  (t (br),  $^1J_{P-X-PN} = 347.0$  Hz,  $^1J_{P-X-PM} = 379.2$  Hz, 1 P,  $P^X$ ), 128.0 (td,  $^1J_{P_2-PA} = 353.1$  Hz,  $^1J_{PN-PX} = 347.0$  Hz,  $^2J_{PN-PM} = 71.3$  Hz, 1 P,  $P^N$ ), 134.2 (ddd,  $^1J_{PM-PX} = 379.2$  Hz,  $^2J_{PM-PA} = 281.7$  Hz,  $^2J_{PM-PN} = 71.3$  Hz, 1 P,  $P^M$ ), 182.0 (dd,  $^1J_{PA-PN} = 353.1$ ,  $^2J_{PA-PM} = 281.7$  Hz, 1 P,  $P^A$ )  
 $^{31}P\{^1H\}$ : (AMNX spin system)  $\delta$ ppm =  $-1.1$  (t (br),  $^1J_{P-X-PN} = 347.0$  Hz,  $^1J_{P-X-PM} = 379.2$  Hz, 1 P,  $P^X$ ), 128.0 (td,  $^1J_{P_2-PA} = 353.1$  Hz,  $^1J_{PN-PX} = 347.0$  Hz,  $^2J_{PN-PM} = 71.3$  Hz, 1 P,  $P^N$ ), 134.2 (ddd,  $^1J_{PM-PX} = 379.2$  Hz,  $^2J_{PM-PA} = 281.7$  Hz,  $^2J_{PM-PN} = 71.3$  Hz, 1 P,  $P^M$ ), 182.0 (dd,  $^1J_{PA-PN} = 353.1$ ,  $^2J_{PA-PM} = 281.7$  Hz, 1 P,  $P^A$ )  
 $^{19}F\{^1H\}$ :  $\delta$ ppm =  $-75.50$  (s, [TEF] $^-$ )

$[(Cp^*Ni)_2(\mu;\eta^3:\eta^1:\eta^1-P_4biphenCl)][GaCl_4]$  (**3b**[GaCl<sub>4</sub>])

Following the same synthetic protocol as for (**2d**[GaCl<sub>4</sub>]) but performing the reaction in *o*-DFB and stirring for 20 h again leads to a dark red solution of (**2d**[GaCl<sub>4</sub>]), by NMR spectroscopy. When this solution was concentrated to 4 mL, layered with *n*-hexane (6:1), and then stored at room temperature for two weeks  $[(Cp^*Ni)_2(\mu;\eta^3:\eta^1:\eta^1-P_4biphenCl)][GaCl_4]$  (**3b**[GaCl<sub>4</sub>]) crystallised as light brown plates of X-ray quality. Alternatively, **2d**[GaCl<sub>4</sub>] can be stirred in *o*-DFB solution (4 mL) for two weeks. When the resulting solution is layered with *n*-hexane, crystals of **3b**[GaCl<sub>4</sub>] can be obtained in similar yield. Decanting off the solvent followed by washing steps (3 x 10 mL *n*-hexane) and drying under reduced pressure ( $10^{-3}$  mbar) gives pure **3b**[GaCl<sub>4</sub>].

Yield: 41 mg (0.037 mmol, 74% based on **1**)  
 Elemental analysis: calc. (%) for  $[(Cp^*Ni)_2(\mu;\eta^3:\eta^1:\eta^1-P_4biphenCl)][GaCl_4]$  ( $C_{46}H_{66}P_4Cl_5NiGa$ ): C: 49.90 H: 6.01 found (%): C: 50.02 H: 5.94  
 ESI(+)-MS (*o*-DFB):  $m/z$  (%) = 895.2 (100)  $[(Cp^*Ni)_2(\mu;\eta^3:\eta^1:\eta^1-P_4biphenCl)]^+$   
 NMR ( $CD_2Cl_2$ , 298 K):  $^1H$ :  $\delta$ ppm = 0.89 (s, 9 H,  $C(CH_3)_3$ ), 1.11 (s, 9 H,  $C(CH_3)_3$ ), 1.25 (s, 9 H,  $C(CH_3)_3$ ), 1.38 (s, 9 H,  $C(CH_3)_3$ ), 1.40 (s, 9 H,  $C(CH_3)_3$ ), 1.42 (s, 9 H,  $C(CH_3)_3$ ), 4.69 (s, 1 H,  $C_5H_2^tBu_3$ ), 5.20 (s, 1 H,  $C_5H_2^tBu_3$ ), 5.54 (s, 1 H,  $C_5H_2^tBu_3$ ), 5.60 (s, 1 H,  $C_5H_2^tBu_3$ ), 7.53 (m, 2 H, biphen), 7.61 – 7.80 (m (br), 4 H, biphen), 8.00 (m, 2 H, biphen)  
 $^{31}P\{^1H\}$ :  $\delta$ ppm =  $-31.9$  (br, 1 P), 80.6 (br, 1 P), 84.1 (dd,  $^1J_{PP} = 246.9$ ,  $^2J_{PP} = 112.1$  Hz, 1 P), 146.6 (ddd,  $^1J_{PP} = 392.2$  Hz,  $^2J_{PP} = 112.1$  Hz,  $^2J_{PP} = 69$  Hz, 1 P)  
 $^{31}P$ :  $\delta$ ppm = 84.1 (br, 1 P), 146.6 (m, 1 P); other signals are not observed due to significant line broadening

$[(Cp^*Ni)_2(\mu;\eta^3-\eta^3-P_3)][GaCl_4]$  (**4**)

A colourless solution of  $GaCl_3$  (36 mg, 0.2 mmol, 1 eq.) in *o*-DFB (4 mL) was added to a bright orange solution of **1** (78 mg, 0.2 mmol, 1 eq.) in *o*-DFB (4 mL), which resulted in an immediate colour change to a dark greenish brown. This solution was stirred for 1 h and then 40 mL of *n*-pentane were added to precipitate a dark brown oil. The slightly yellowish solvent mixture was decanted, the oil washed three times with 10 mL of toluene and another three times with 10 mL of *n*-pentane, each and then dissolved in 3 mL of *o*-DFB again. This solution was layered with 25 mL of *n*-pentane and stored for four weeks at room temperature, affording dark greenish brown crystals of  $[(Cp^*Ni)_2(\mu;\eta^3-\eta^3-P_3)][GaCl_4]$  (**4**) in X-ray analysis quality.

Yield: 72 mg (0.074 mmol, 74% based on **1**)  
 Elemental analysis: calc. (%) for  $[(Cp^*Ni)_2(\mu;\eta^3-\eta^3-P_3)][GaCl_4]\cdot(GaCl_3)_{0.5}$  ( $C_{34}H_{58}P_3Cl_{5.5}Ni_2Ga_{1.5}$ ): C: 41.81 H: 5.99 found (%): C: 42.17 H: 5.82  
 ESI(+)-MS (*o*-DFB):  $m/z$  (%) = 675.2 (80)  $[(Cp^*Ni)_2(\mu;\eta^3-\eta^3-P_3)]^+$ , below 300 (several peaks that could not be assigned to certain molecular fragments)  
 NMR ( $CD_2Cl_2$ , 298 K):  $^1H$ :  $\delta$ ppm = 1.02 (s, 18 H,  $C(CH_3)_3$ ), 1.36 (s, 36 H,  $C(CH_3)_3$ ), 4.66 (s, 2 H,  $C_5H_2^tBu_3$ )  
 $^{31}P\{^1H\}$ :  $\delta$ ppm = 139.5 (s)  
 $^{31}P$ :  $\delta$ ppm = 139.5 (s)

## SUPPORTING INFORMATION

## Tested reactions and conditions

Attempts to employ  $t\text{Bu}_2\text{PCl}$  or  $(\text{Et}_2\text{N})_2\text{PCl}$  under identical conditions (*o*-DFB,  $\text{Ti}[\text{TEF}]$  equimolar) as for the synthesis of **2a-2e**[TEF] failed as no observable colour change or precipitation of a white solid occurred.  $^{31}\text{P}$  NMR spectra of the reaction mixtures revealed unreacted halogenophosphanes and **1** at  $\delta = -168.8$  ppm. Using two equivalents of  $\text{Ph}_2\text{PCl}$  (0.2 mmol, 44 mg, 35.8  $\mu\text{L}$ , 2 eq.) and  $\text{Ti}[\text{TEF}]$  (0.2 mmol, 234 mg, 2 eq.) with only one equivalent of **1** (0.1 mmol, 38 mg, 1 eq.) under identical conditions did not lead to the anticipated second insertion of  $[\text{Ph}_2\text{P}]^+$  into **2a**<sup>+</sup>. This reaction rather yielded **2a**[TEF] in similar yields to the reported procedure (*vide supra*) accompanied by  $[\text{Ph}_2\text{ClPPPh}_2][\text{TEF}]$ , identified by  $^{31}\text{P}$  NMR spectra of the reaction solutions. When **1** (0.1 mmol, 38 mg, 1 eq.) is reacted with dihalogenophosphanes  $\text{R}_2\text{PCl}_2$  ( $\text{R} = \text{Ph}, t\text{Bu}$ ; 0.1 mmol) in the presence of two equivalents of  $\text{Ti}[\text{TEF}]$  (0.2 mmol, 234 mg, 2 eq.) the second chloride atom is not abstracted and the reaction outcome are the products **2f**[TEF] and **2g**[TEF]. Excess of  $\text{Ti}[\text{TEF}]$  crystallises from the reaction mixtures upon layering with *n*-hexane and cooling to  $-30$  °C.

## NMR spectroscopic investigations

Assignment of the signals in the  $^{31}\text{P}$  NMR spectra ( $\text{CD}_2\text{Cl}_2$ , r. t.) of the compounds **2a-g** is simplified by the broadening of the signal of the former phosphonium ion (P1) compared to the  $^{31}\text{P}\{^1\text{H}\}$  NMR spectrum. The other signals can then be assigned by following the  $^1J_{\text{PP}}$  couplings around the  $\text{P}_4$  ring. For simplification, the  $^{31}\text{P}\{^1\text{H}\}$  and  $^{31}\text{P}$  NMR spectra of **2a-e** and **2f/g** are compared in Figure S11 and Figure S12, respectively. The signals are labelled according to Figure S11b.

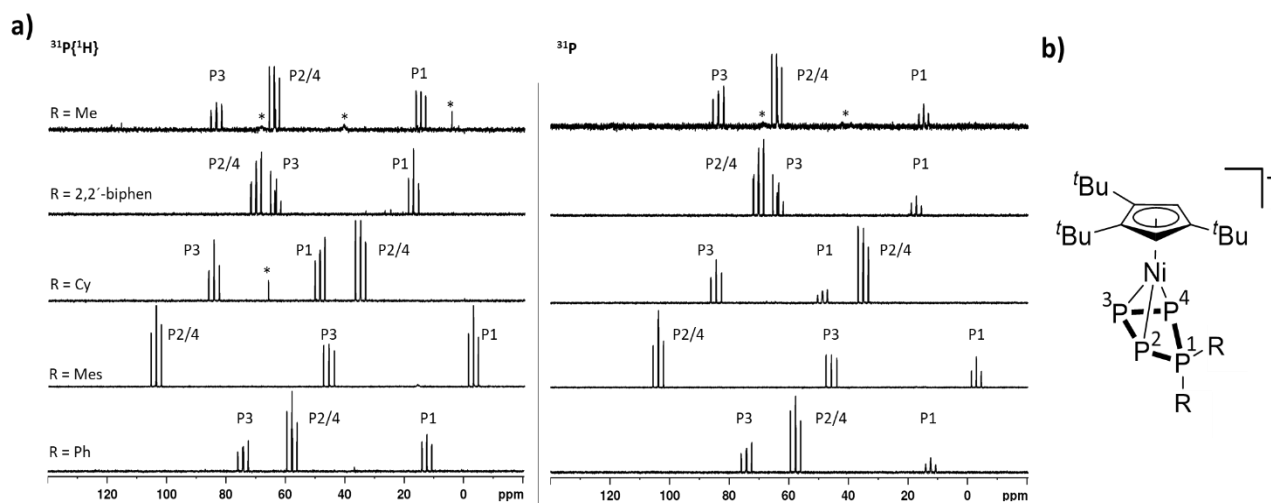

Figure S1:  $^{31}\text{P}$  and  $^{31}\text{P}\{^1\text{H}\}$  NMR spectra of **2f-2g**[TEF] in  $\text{CD}_2\text{Cl}_2$  recorded at 298 K with signal assignment corresponding to Figure S1 1b); The endo/exo labelling for **2f** refers to the position of the Ph ring on the  $\text{P}_4$  ring.

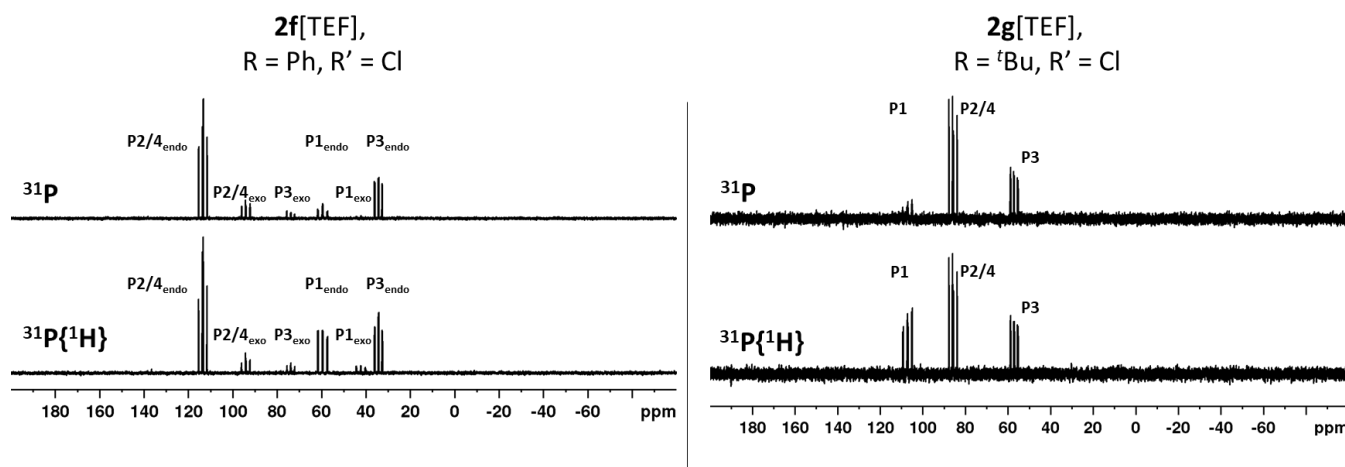

Figure S2: a)  $^{31}\text{P}\{^1\text{H}\}$  (left) and  $^{31}\text{P}$  NMR spectra (right) of **2a-2e**[TEF] in  $\text{CD}_2\text{Cl}_2$  recorded at 298 K; signal assignment is done according to the structure shown in b) to illustrate the variation of the sequence of the signals with the corresponding P atoms.

## SUPPORTING INFORMATION

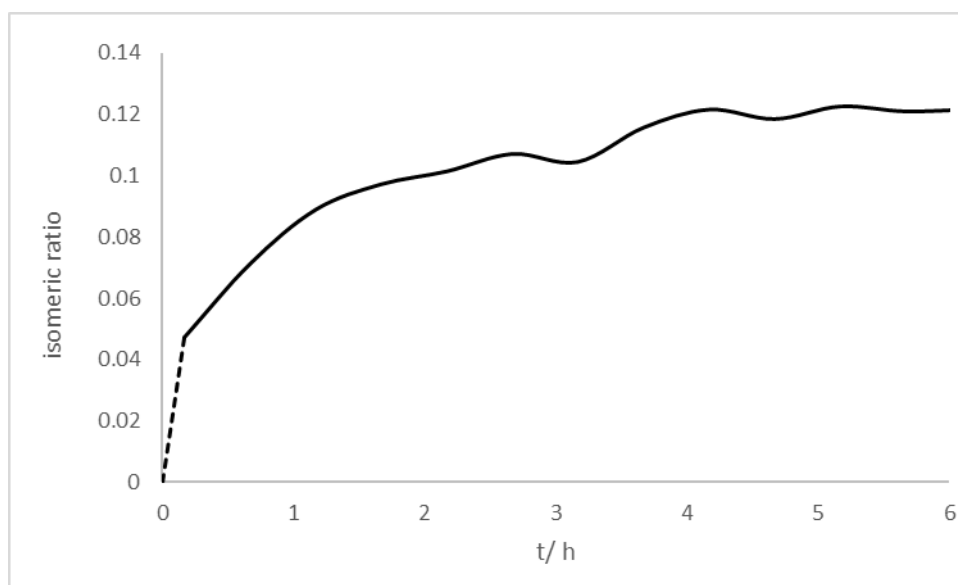

Figure SI 3: Plot of the isomeric ratio  $2f_{\text{endo}}:2f_{\text{exo}}$  against the time after dissolving crystals of  $2f_{\text{endo}}[\text{TEF}]$  in  $\text{CD}_2\text{Cl}_2$  obtained from  $^{31}\text{P}$  NMR spectra recorded every 30 min for 6 h; The final ratio after 6 h is 8:1, which is very close to that observed for spectra of precipitated  $2f$  (7:1).

As both isomers of  $2f$  are formed during the reaction of  $1$  with  $\text{Ph}_2\text{PCI}$  and  $\text{Ti}[\text{TEF}]$ , the question arises if they exist in equilibrium or if the observed isomeric ratio of 7:1 ( $2f_{\text{endo}}:2f_{\text{exo}}$ ) is due to kinetic factors during the reaction. Thus, crystals of  $2f_{\text{endo}}[\text{TEF}]$  were subjected to  $^{31}\text{P}$  NMR spectroscopic measurements to gather information about the formation of both isomers of  $2f$ . Crystals of  $2f_{\text{endo}}[\text{TEF}]$  were dissolved in 0.8 mL of  $\text{CD}_2\text{Cl}_2$  and  $^{31}\text{P}$  NMR spectra of this sample were recorded every 30 min for 6 h. The plot of the isomeric ratio during this time (Figure SI 3) shows that the initially present endo isomer slowly interconverts to the exo isomer until an isomeric ratio of 7:1 ( $2f_{\text{endo}}:2f_{\text{exo}}$ ) is approached after 6 h. This clearly supports the assumption that both isomers exist in equilibrium (in solution) and their formation is not based on kinetic factors during the initial synthesis of  $2f$ .

The room temperature  $^{31}\text{P}$  and  $^{31}\text{P}\{^1\text{H}\}$  NMR spectra of  $3a$  in  $\text{CD}_2\text{Cl}_2$  are identical and express an AMNX spin system. An expected similar spectrum is not observed for  $3b$  in  $\text{CD}_2\text{Cl}_2$ , which is probably caused by a dynamic effect involving rotation of the  $\text{Cp}^{\text{***}}$  ligands. Thus, the complete set of four resonances in the spectrum of  $3b$  is only observed at very high scan numbers (6144), but two of them are significantly broadened (Figure SI 4).

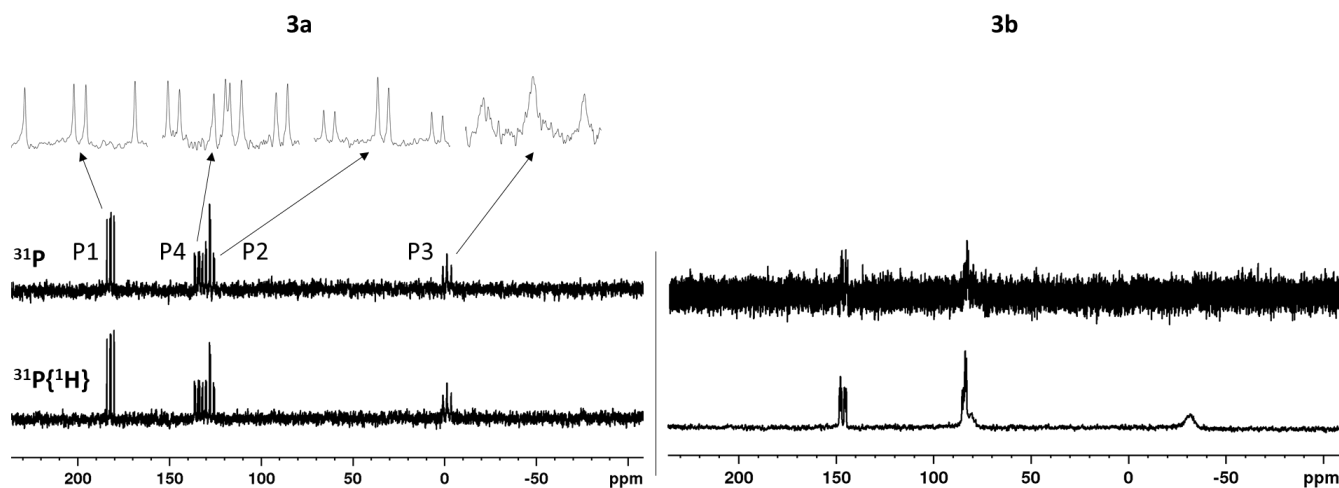

Figure SI 4:  $^{31}\text{P}$  (top) and  $^{31}\text{P}\{^1\text{H}\}$  (bottom) NMR spectra of  $3a$  and  $3b$  in  $\text{CD}_2\text{Cl}_2$  recorded at 298 K with zoomed in signals for the spectra of  $3a$ ; The  $^{31}\text{P}\{^1\text{H}\}$  NMR spectrum of  $3b$  was recorded with 6144 scans to be able to see the full set of four signals, which is not visible for the  $^{31}\text{P}$  NMR spectrum (512 scans).

Only when the solution is cooled to  $-80^\circ\text{C}$  sharp signals can be observed. However, at this temperature two sets of signals are found in the  $^{31}\text{P}\{^1\text{H}\}$  NMR spectrum (Figure SI 5), thus indicating the presence of two isomeric forms of  $3b_{1/2}$ . We attribute these isomers to differently rotated  $\text{Cp}^{\text{***}}$  ligands at both Ni centres. As the number of scans needed for recording this spectrum was still very high (8192), the corresponding  $^{31}\text{P}$  spectrum could not be recorded and signal assignment was conducted as for  $3a$  (most downfield shifted signal

## SUPPORTING INFORMATION

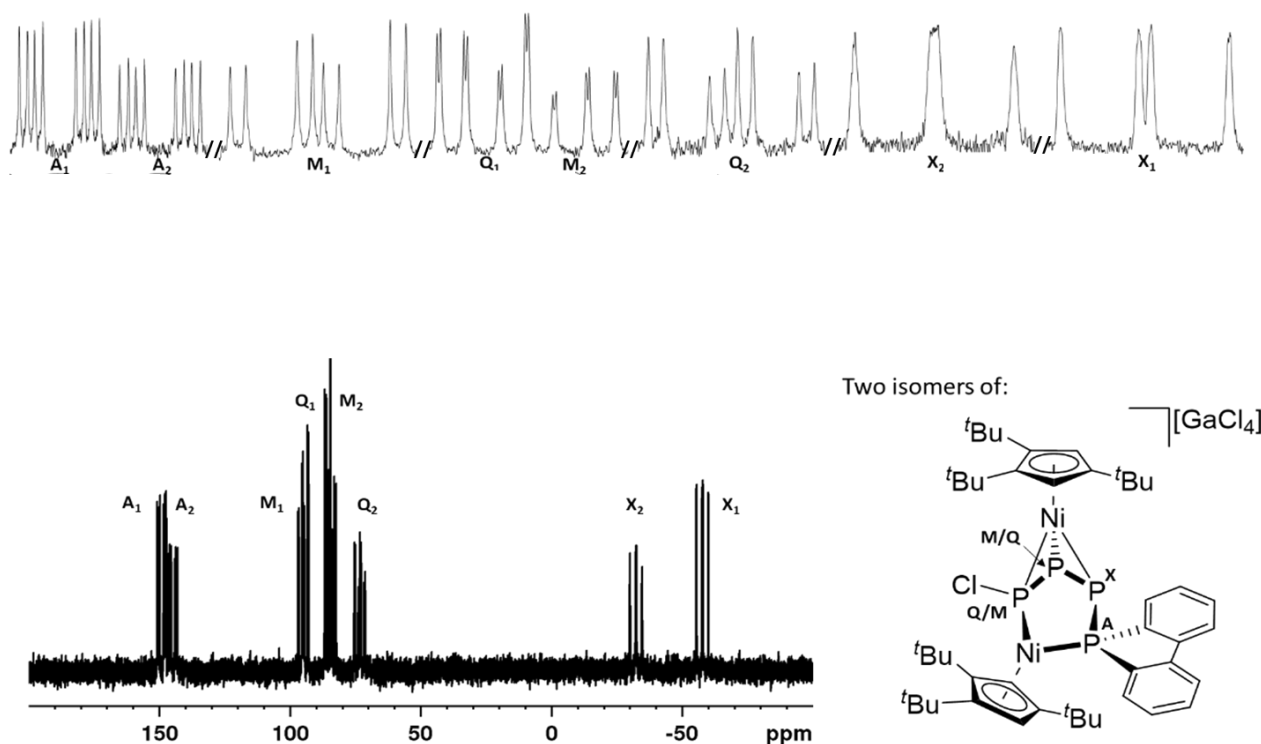

Figure SI 5:  $^{31}\text{P}\{^1\text{H}\}$  NMR spectrum of **3b** in  $\text{CD}_2\text{Cl}_2$  recorded at 193 K with 8192 scans (bottom), zoomed in signal with assignment (top) and structure of **3b** with assigned P atoms (right); Isomerism in the cation **3b** is most probably caused by hindered rotation of the  $\text{Cp}^*$  ligands at this temperature; Spectral parameters: **3b**<sub>1</sub>:  $\delta/\text{ppm} = 149.1$  (ddd,  $^1J_{\text{PA-PX}} = 397.1$  Hz,  $^2J_{\text{PA-PQ}} = 108.2$  Hz,  $^2J_{\text{PA-PM}} = 57.3$  Hz, 1 P,  $\text{P}^{\text{A}}$ ), 94.8 (ddd,  $^1J_{\text{PM-PX}} = 346.9$  Hz,  $^1J_{\text{PM-PQ}} = 247.2$  Hz,  $^2J_{\text{PM-PA}} = 57.3$  Hz, 1 P,  $\text{P}^{\text{M}}$ ), 85.7 (ddd,  $^1J_{\text{PQ-PM}} = 247.2$  Hz,  $^2J_{\text{PQ-PA}} = 108.2$  Hz,  $^2J_{\text{PQ-PX}} = 11.7$  Hz, 1 P,  $\text{P}^{\text{Q}}$ ),  $-57.8$  (ddd,  $^1J_{\text{PX-PA}} = 397.13$  Hz,  $^1J_{\text{PX-PM}} = 346.9$  Hz,  $^2J_{\text{PX-PQ}} = 11.7$  Hz, 1 P,  $\text{P}^{\text{X}}$ ); **3b**<sub>2</sub>:  $\delta/\text{ppm} = 144.7$  (ddd,  $^1J_{\text{PA-PX}} = 391.2$  Hz,  $^2J_{\text{PA-PM}} = 113.2$  Hz,  $^2J_{\text{PA-PQ}} = 60.6$  Hz, 1 P,  $\text{P}^{\text{A}}$ ), 83.4 (ddd,  $^1J_{\text{PM-PQ}} = 246.2$  Hz,  $^2J_{\text{PM-PA}} = 113.2$ ,  $^2J_{\text{PM-PX}} = 11.7$  Hz, 1 P,  $\text{P}^{\text{M}}$ ), 73.4 (ddd,  $^1J_{\text{PQ-PX}} = 360.4$  Hz,  $^1J_{\text{PQ-PM}} = 246.2$  Hz,  $^2J_{\text{PQ-PA}} = 60.6$  Hz, 1 P,  $\text{P}^{\text{Q}}$ ),  $-32.4$  (ddd,  $^1J_{\text{PX-PA}} = 391.2$  Hz,  $^1J_{\text{PX-PQ}} = 360.4$  Hz,  $^2J_{\text{PX-PM}} = 11.7$  Hz, 1 P,  $\text{P}^{\text{X}}$ ).

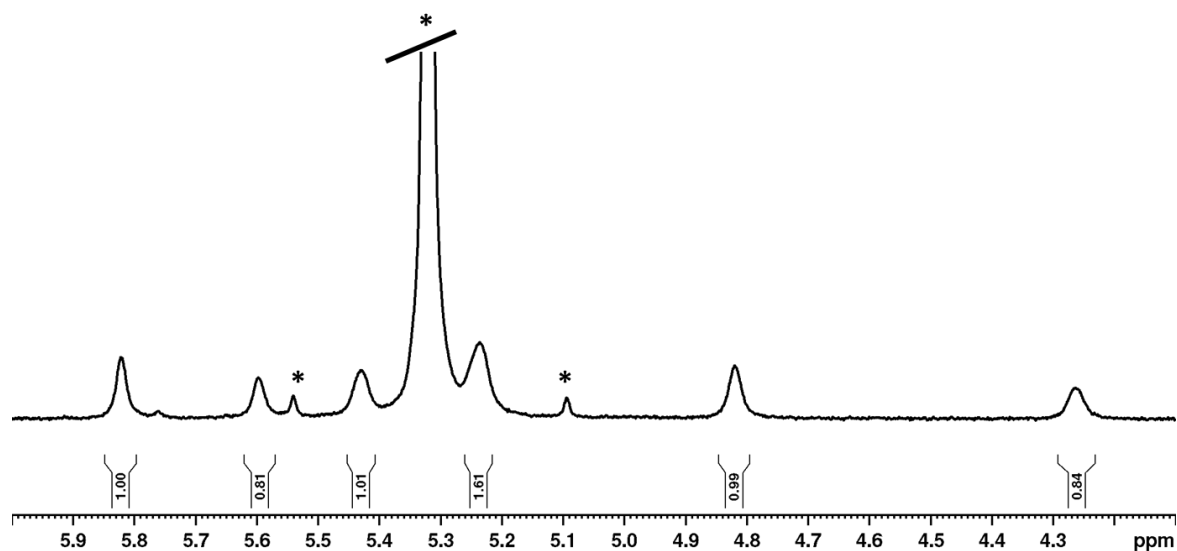

Figure SI 6:  $^1\text{H}$  NMR spectrum of **3b** in  $\text{CD}_2\text{Cl}_2$  recorded at 193 K showing two sets of signals for the  $\text{C}_5\text{H}_2\text{Bu}_3$  protons, thus indicating the presence of two isomers of **3b**<sub>1,2</sub> in a ratio of 1.25:1; One of the expected signals is probably overlapped by the large solvent signal caused by residual  $\text{CH}_2\text{Cl}_2$  (\*).

should be that of  $\text{P}^{\text{A}}$  due to the similarity with the starting material (2,2'-biphen)PCl). However, the corresponding  $^1\text{H}$  NMR shows signals in accordance with two isomers of **3b** being present. While the respective signals of the  $^t\text{Bu}$  and the biphen moieties overlap and thus avoid further interpretation, the region for the  $\text{C}_5\text{H}_2\text{Bu}_3$  protons is well resolved and allows for integration (Figure SI 6), which affords an isomeric ratio of 1:1.25.

The allylic distortion of the  $\text{P}_3$  middle deck in **4** leads to inequivalent P atoms and thus its  $^{31}\text{P}$  NMR spectrum should show multiple (two) signals. Similar behaviour is found for the isoelectronic complex  $[(\text{Cp}^*\text{Co})(\text{Cp}^*\text{Ni})(\mu, \eta^3\text{-P}_3)]$ .<sup>[7]</sup> However, in the room temperature  $^{31}\text{P}$

## SUPPORTING INFORMATION

NMR spectrum of **4** in  $\text{CD}_2\text{Cl}_2$  only one sharp singlet is found, located at  $\delta = 139.5$  ppm, which hints towards a dynamic process of the  $\text{P}_3$  middle deck in solution. A  $^{31}\text{P}\{^1\text{H}\}$  VT NMR study of **4** in  $\text{CD}_2\text{Cl}_2$  (Figure SI 7) revealed that this dynamic behaviour is retained even at temperatures as low as 193 K. The only noticeable change in these spectra is the slight shift of the singlet upon cooling of the sample.

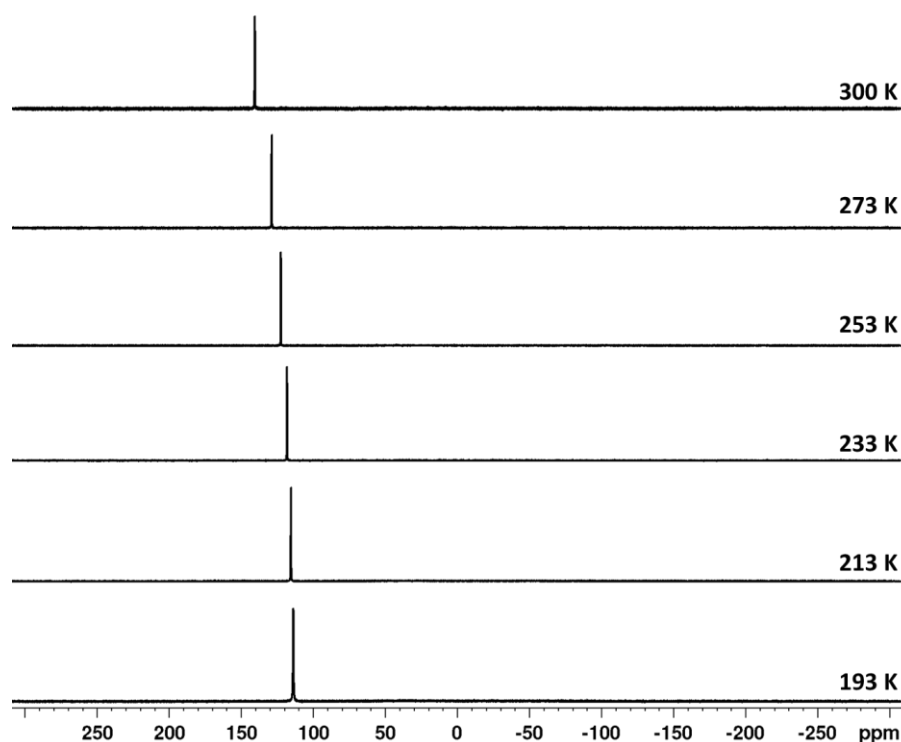

Figure SI 7:  $^{31}\text{P}\{^1\text{H}\}$  NMR spectra of **4** in  $\text{CD}_2\text{Cl}_2$  recorded at different temperatures.

To get insight into the formation of the dinuclear products **3** an NMR study was carried out to elucidate possible intermediates. Thus,  $\text{PBr}_3$  (10  $\mu\text{L}$ , 0.1 mmol, 1 eq.) was added to a freshly prepared solution of **1** (38 mg, 0.1 mmol, 1 eq.) and  $\text{Ti}[\text{TEF}]$  (117 mg, 0.1 mmol, 1 eq.) in 1 mL of *o*-DFB. A capillary with toluene- $d^8$  and  $\text{PPh}_3$  (standard) was added, the NMR tube closed and then shaken. Immediately

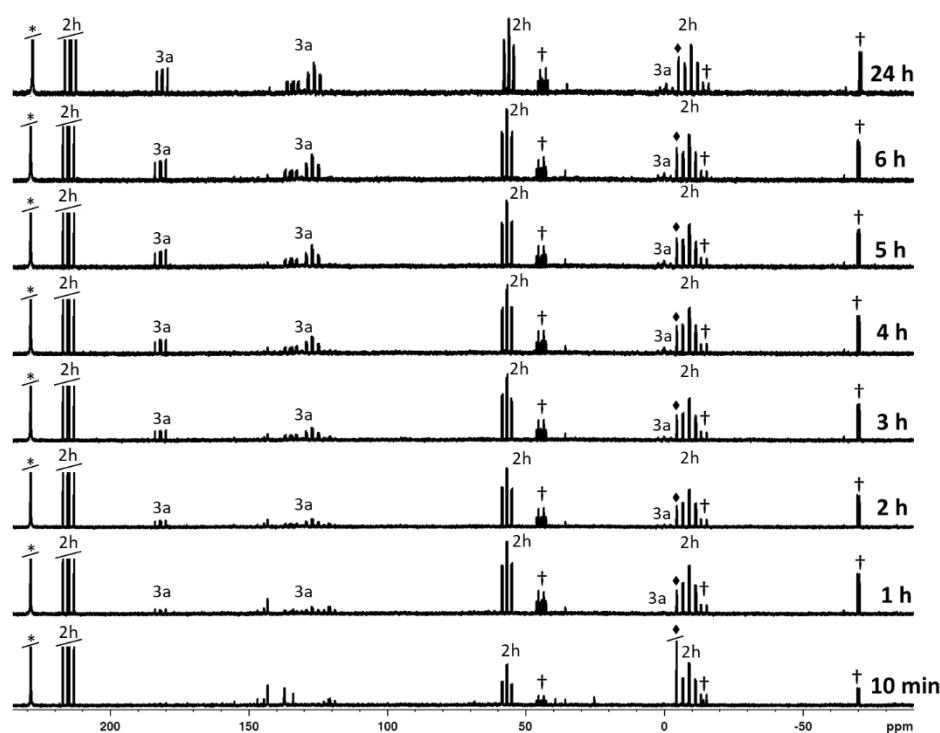

Figure SI 8:  $^{31}\text{P}\{^1\text{H}\}$  NMR spectra of a reaction solution containing 0.1 mmol of **1**,  $\text{PBr}_3$  and  $\text{Ti}[\text{TEF}]$  in *o*-DFB with a capillary containing toluene- $d^8$  and  $\text{PPh}_3$  (\*); Spectra were measured hour-wise and additionally another spectrum was measured 24 h after addition of  $\text{PBr}_3$ ; Signals are assigned to the corresponding species **2h**, **3a**, † (unidentified side product) and \* (residual  $\text{PBr}_3$ ).

## SUPPORTING INFORMATION

the solution turned dark brown and the sample was subjected to the first measurement (10 min). Afterwards,  $^{31}\text{P}\{^1\text{H}\}$  NMR spectra of the solution were recorded every hour and a final one was collected 24 h after the reaction was started (Figure SI 8). In the first spectrum the immediate formation of **2h** can be seen, alongside the complete consumption of the starting material **1**. After one hour the formation of **3a** is visible in the spectra and a third species (**†**) also appears but so far eludes structural assignment.

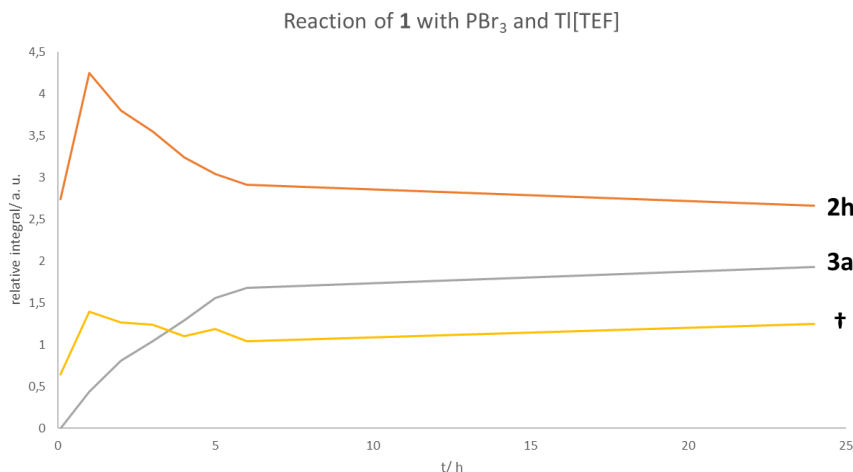

Figure SI 9: Relative signal intensities of **2h**, **3a** and **†** compared to the standard  $\text{PPh}_3$  over the course of 24 h; The flattening of the plot is probably caused by the absence of mixing in between the measurements.

While the intensity of the signals corresponding to **2h** slowly decrease, the ones for **3a** increase and that of **†** stays the same (Figure SI 9). This data may suggest that **2h** is an intermediate during the reaction of **1** with “ $[\text{Br}_2\text{P}][\text{TEF}]$ ” which finally affords **3a**. Further insight into this reaction could however not be obtained as the precipitation of  $\text{TiCl}$  and the elongated reaction times (three days with stirring) caused severe problems during NMR spectroscopic investigations. Thus, the plot in figure SI 7 can only be seen having qualitative character.

In one more attempt to get an understanding of this reaction we recorded  $^{31}\text{P}\{^1\text{H}\}$  NMR spectra of reaction solutions (*o*-DFB,  $\text{C}_6\text{D}_6$  capillary) with a very broad ppm range (Figure SI 10). Thus, we were able to find  $\text{P}_4$  as one of the by-products of the reaction yielding **3a**. Accordingly, a reaction mechanism involving the initial formation of **2h** followed by its fragmentation into  $\text{P}_4$  and a  $\{\text{Cp}'''\text{Ni}\}$  containing species and the formation of **3a** from this species and another equivalent of **2h** seems to be plausible. However, this complicated reaction pathway involving several species eludes further study so far.

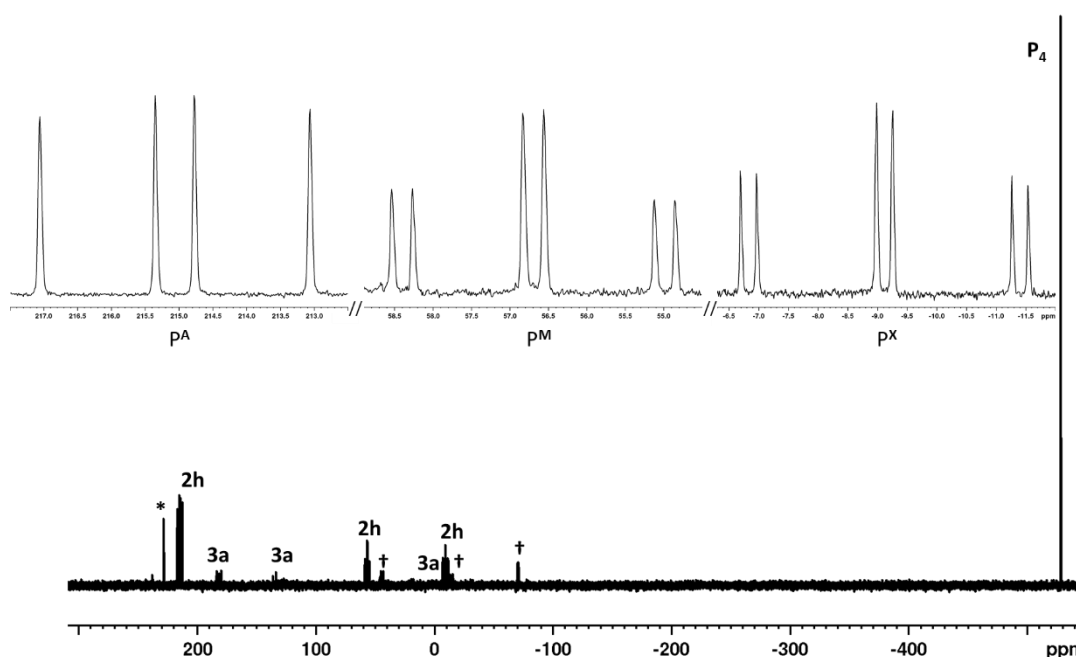

Figure SI 10: Bottom:  $^{31}\text{P}\{^1\text{H}\}$  NMR spectrum of the reaction mixture (0.1 mmol **1**,  $\text{PBr}_3$  and  $\text{Ti}[\text{TEF}]$ ) in *o*-DFB ( $\text{C}_6\text{D}_6$  capillary) recorded at 298 K with a broad ppm range; The singlet at  $\delta = -528.3$  ppm clearly shows the formation of  $\text{P}_4$  during the reaction; Top: Zoomed in signals assigned to **2h**, which shows a typical  $\text{A}_2\text{MX}$  spectrum; Spectral parameters:  $\delta/\text{ppm} = 215.1$  (dd,  $^1J_{\text{PA-PX}} = 370.6$  Hz,  $^1J_{\text{PA-PM}} = 277.5$  Hz, 2P,  $\text{P}^{\text{A}}$ ), 56.7 (td,  $^1J_{\text{PM-PA}} = 277.5$  Hz,  $^2J_{\text{PM-PX}} = 44.1$  Hz, 1P,  $\text{P}^{\text{M}}$ ), -9.1 (td,  $^1J_{\text{PX-PA}} = 370.6$  Hz,  $^2J_{\text{PX-PM}} = 44.1$  Hz, 1P,  $\text{P}^{\text{X}}$ ).



## SUPPORTING INFORMATION

## X-ray crystallographic information

The crystallographic data for all synthesised compounds was collected on either an Xcalibur Gemini (Agilent technologies, AT) with an Atlas<sup>S2</sup> detector using Mo-K $\alpha$  (**2a**[SbF<sub>6</sub>], **2a**[GaCl<sub>4</sub>], **2a**[TEF], **2g**[TEF], **3a**[TEF]) radiation (sealed tube), on a SuperNova diffractometer (AT) with a Titan<sup>S2</sup> detector using Cu-K $\beta$  radiation (**2a**[OTf], **2c**[GaCl<sub>4</sub>], **2e**[TEF], **3b**[GaCl<sub>4</sub>], **4**[GaCl<sub>4</sub>]), obtained by using customised optics, or on another SuperNova diffractometer (AT) with a Titan<sup>S2</sup> detector using a standard Cu-K $\alpha$  (**2d**[GaCl<sub>4</sub>]) sealed tube microfocus source. Data reduction and absorption correction were performed with the CrysAlisPro software package.<sup>[8]</sup> Structure solution and refinement was conducted in Olex2 (1.3-alpha)<sup>[9]</sup> with ShelXT<sup>[10]</sup> (solution) and ShelXL-2014<sup>[11]</sup> (least squares refinement ( $F^2$ )) or olex2.refine (Gauss-Newton).<sup>[9]</sup> All non-H atoms were refined with anisotropic displacement parameters and H atoms were treated as riding models with isotropic displacement parameters and fixed C-H bond lengths (sp<sup>3</sup>: 0.96 (CH<sub>3</sub>), 0.97 (CH<sub>2</sub>); sp<sup>2</sup>: 0.93 (CH)). Residual electron density arising from disordered solvent molecules was treated with the integrated solvent mask procedure of Olex2 (1.3 alpha) and visualisation of the crystal structures was done with this program as well.<sup>[9]</sup>

CCDC-2015036 (**1**), CCDC-2015037 (**2a**[OTf]), CCDC-2015038 (**2a**[SbF<sub>6</sub>]), CCDC-2015039 (**2a**[TEF]), CCDC-2015040 (**2a**[GaCl<sub>4</sub>]), CCDC-2015041 (**2c**[GaCl<sub>4</sub>] oDFB), CCDC-2015042 (**2d**[GaCl<sub>4</sub>]), CCDC-2015043 (**2e**[TEF]), CCDC-2015044 (**2fendo**[GaCl<sub>4</sub>]), CCDC-2015045 (**3a**[TEF]), CCDC-2015046 (**3b**[GaCl<sub>4</sub>]) and CCDC-2015047 (**4**[GaCl<sub>4</sub>] oDFB), contain the supplementary crystallographic data for this paper. These data can be obtained free of charge at [www.ccdc.cam.ac.uk/contents/retrieving.html](http://www.ccdc.cam.ac.uk/contents/retrieving.html) (or from the Cambridge Crystallographic Data Centre, 12 Union Road, Cambridge CB2 1EZ, UK; Fax: +44-1223-336-033; e-mail: deposit@ccdc.com.ac.uk).

Table S1: X-ray crystallographic data on all crystallographically characterised compounds.

| Compound                                    | <b>1</b> <sup>[12]</sup>                                      | <b>2a</b> [OTf]                                                                  | <b>2a</b> [SbF <sub>6</sub> ]                                      |
|---------------------------------------------|---------------------------------------------------------------|----------------------------------------------------------------------------------|--------------------------------------------------------------------|
| Empirical formula                           | C <sub>17</sub> H <sub>29</sub> NiP <sub>3</sub>              | C <sub>30</sub> H <sub>39</sub> F <sub>3</sub> NiO <sub>3</sub> P <sub>4</sub> S | C <sub>29</sub> H <sub>39</sub> F <sub>6</sub> NiP <sub>4</sub> Sb |
| Formula weight                              | 385.02                                                        | 719.26                                                                           | 805.94                                                             |
| Temperature/K                               | 123.00(10)                                                    | 122.98(17)                                                                       | 293(2)                                                             |
| Crystal system                              | monoclinic                                                    | monoclinic                                                                       | monoclinic                                                         |
| Space group                                 | P2 <sub>1</sub> /n                                            | P2 <sub>1</sub> /n                                                               | P2 <sub>1</sub> /n                                                 |
| a/Å                                         | 19.2653(9)                                                    | 10.49870(10)                                                                     | 10.6938(2)                                                         |
| b/Å                                         | 14.6055(3)                                                    | 26.0828(2)                                                                       | 25.2128(4)                                                         |
| c/Å                                         | 9.2674(4)                                                     | 12.95300(10)                                                                     | 13.2668(2)                                                         |
| $\alpha$ /°                                 | 90                                                            | 90                                                                               | 90                                                                 |
| $\beta$ /°                                  | 133.487(8)                                                    | 109.4820(10)                                                                     | 110.963(2)                                                         |
| $\gamma$ /°                                 | 90                                                            | 90                                                                               | 90                                                                 |
| Volume/Å <sup>3</sup>                       | 1891.9(2)                                                     | 3343.91(5)                                                                       | 3340.25(10)                                                        |
| Z                                           | 4                                                             | 4                                                                                | 4                                                                  |
| $\rho_{\text{calc}}$ /cm <sup>3</sup>       | 1.352                                                         | 1.429                                                                            | 1.603                                                              |
| $\mu$ /mm <sup>-1</sup>                     | 7.840                                                         | 5.520                                                                            | 1.616                                                              |
| F(000)                                      | 816.0                                                         | 1496.0                                                                           | 1624.0                                                             |
| Crystal size/mm <sup>3</sup>                | 0.352 × 0.245 × 0.151                                         | 0.383 × 0.293 × 0.111                                                            | 0.402 × 0.224 × 0.165                                              |
| Radiation                                   | Cu K $\beta$ ( $\lambda$ = 1.39222)                           | Cu K $\beta$ ( $\lambda$ = 1.39222)                                              | Mo K $\alpha$ ( $\lambda$ = 0.71073)                               |
| 2 $\theta$ range for data collection/°      | 7.906 to 149.05                                               | 6.12 to 148.27                                                                   | 6.582 to 64.626                                                    |
| Index ranges                                | -26 ≤ h ≤ 22, -12 ≤ k ≤ 20, -11 ≤ l ≤ 12                      | -13 ≤ h ≤ 14, -35 ≤ k ≤ 30, -17 ≤ l ≤ 16                                         | -15 ≤ h ≤ 15, -34 ≤ k ≤ 37, -19 ≤ l ≤ 19                           |
| Reflections collected                       | 10908                                                         | 28827                                                                            | 31775                                                              |
| Independent reflections                     | 5090 [R <sub>int</sub> = 0.0372, R <sub>sigma</sub> = 0.0466] | 9012 [R <sub>int</sub> = 0.0409, R <sub>sigma</sub> = 0.0359]                    | 10913 [R <sub>int</sub> = 0.0322, R <sub>sigma</sub> = 0.0417]     |
| Data/restraints/parameters                  | 5090/0/199                                                    | 9012/63/420                                                                      | 10913/0/379                                                        |
| Goodness-of-fit on F <sup>2</sup>           | 1.017                                                         | 1.044                                                                            | 1.061                                                              |
| Final R indexes [ $I \geq 2\sigma(I)$ ]     | R <sub>1</sub> = 0.0345, wR <sub>2</sub> = 0.0864             | R <sub>1</sub> = 0.0380, wR <sub>2</sub> = 0.1046                                | R <sub>1</sub> = 0.0343, wR <sub>2</sub> = 0.0702                  |
| Final R indexes [all data]                  | R <sub>1</sub> = 0.0386, wR <sub>2</sub> = 0.0906             | R <sub>1</sub> = 0.0396, wR <sub>2</sub> = 0.1064                                | R <sub>1</sub> = 0.0501, wR <sub>2</sub> = 0.0773                  |
| Largest diff. peak/hole / e Å <sup>-3</sup> | 0.65/-0.49                                                    | 0.54/-0.73                                                                       | 0.87/-1.15                                                         |

| <b>2a</b> [TEF]                                                                                               | <b>2a</b> [GaCl <sub>4</sub> ]                                     | <b>2c</b> [GaCl <sub>4</sub> ]·(o-DFB) <sub>0.5</sub>                                                          |
|---------------------------------------------------------------------------------------------------------------|--------------------------------------------------------------------|----------------------------------------------------------------------------------------------------------------|
| C <sub>90</sub> H <sub>78</sub> Al <sub>2</sub> F <sub>72</sub> Ni <sub>2</sub> O <sub>8</sub> P <sub>8</sub> | C <sub>29</sub> H <sub>39</sub> Cl <sub>4</sub> GaNiP <sub>4</sub> | C <sub>64</sub> H <sub>106</sub> Cl <sub>8</sub> F <sub>2</sub> Ga <sub>2</sub> Ni <sub>2</sub> P <sub>8</sub> |
| 3074.66                                                                                                       | 781.71                                                             | 1701.70                                                                                                        |
| 122.7(4)                                                                                                      | 293(2)                                                             | 123.00(12)                                                                                                     |
| monoclinic                                                                                                    | monoclinic                                                         | monoclinic                                                                                                     |
| P2 <sub>1</sub> /n                                                                                            | P2 <sub>1</sub> /n                                                 | P2 <sub>1</sub> /n                                                                                             |
| 20.99150(10)                                                                                                  | 10.3088(18)                                                        | 10.30213(12)                                                                                                   |
| 22.23550(10)                                                                                                  | 37.3289(11)                                                        | 16.4498(2)                                                                                                     |
| 25.32560(10)                                                                                                  | 17.239(3)                                                          | 23.1565(3)                                                                                                     |
| 90                                                                                                            | 90                                                                 | 90                                                                                                             |
| 96.6970(10)                                                                                                   | 149.06(5)                                                          | 95.0842(12)                                                                                                    |
| 90                                                                                                            | 90                                                                 | 90                                                                                                             |
| 11740.23(9)                                                                                                   | 3411(2)                                                            | 3908.84(9)                                                                                                     |
| 4                                                                                                             | 4                                                                  | 2                                                                                                              |
| 1.740                                                                                                         | 1.522                                                              | 1.446                                                                                                          |

## SUPPORTING INFORMATION

|                                                                                                                                                                                                                                                                                                                                                                                                                                                                                                                                                                                                                                                                                             |                                                                                                                                                                                                                                                                                                                                                                                                                                                                                                                                                                                                                                                                      |                                                                                                                                                                                                                                                                                                                                                                                                                                                                                                                                                                                                                                                                                                                                    |
|---------------------------------------------------------------------------------------------------------------------------------------------------------------------------------------------------------------------------------------------------------------------------------------------------------------------------------------------------------------------------------------------------------------------------------------------------------------------------------------------------------------------------------------------------------------------------------------------------------------------------------------------------------------------------------------------|----------------------------------------------------------------------------------------------------------------------------------------------------------------------------------------------------------------------------------------------------------------------------------------------------------------------------------------------------------------------------------------------------------------------------------------------------------------------------------------------------------------------------------------------------------------------------------------------------------------------------------------------------------------------|------------------------------------------------------------------------------------------------------------------------------------------------------------------------------------------------------------------------------------------------------------------------------------------------------------------------------------------------------------------------------------------------------------------------------------------------------------------------------------------------------------------------------------------------------------------------------------------------------------------------------------------------------------------------------------------------------------------------------------|
| 3.115<br>6128.0<br>0.322 × 0.208 × 0.175<br>Cu Kα (λ = 1.54184)<br>7.028 to 147.352<br>-24 ≤ h ≤ 26, -27 ≤ k ≤ 27, -23 ≤ l ≤ 31<br>101791<br>23503 [R <sub>int</sub> = 0.0302, R <sub>sigma</sub> = 0.0226]<br>23503/655/2095<br>1.019<br>R <sub>1</sub> = 0.0351, wR <sub>2</sub> = 0.0873<br>R <sub>1</sub> = 0.0382, wR <sub>2</sub> = 0.0900<br>0.62/-0.41                                                                                                                                                                                                                                                                                                                              | 1.862<br>1600.0<br>0.681 × 0.324 × 0.126<br>Mo Kα (λ = 0.71073)<br>7.028 to 64.43<br>-14 ≤ h ≤ 15, -30 ≤ k ≤ 53, -24 ≤ l ≤ 18<br>18408<br>10619 [R <sub>int</sub> = 0.0384, R <sub>sigma</sub> = 0.0815]<br>10619/0/361<br>1.076<br>R <sub>1</sub> = 0.0514, wR <sub>2</sub> = 0.0861<br>R <sub>1</sub> = 0.0744, wR <sub>2</sub> = 0.0965<br>0.88/-0.66                                                                                                                                                                                                                                                                                                             | 6.657<br>1764.0<br>0.339 × 0.205 × 0.082<br>Cu Kβ (λ = 1.39222)<br>5.958 to 139.876<br>-13 ≤ h ≤ 13, -21 ≤ k ≤ 18, -30 ≤ l ≤ 30<br>27605<br>9585 [R <sub>int</sub> = 0.0304, R <sub>sigma</sub> = 0.0298]<br>9585/36/458<br>1.028<br>R <sub>1</sub> = 0.0309, wR <sub>2</sub> = 0.0824<br>R <sub>1</sub> = 0.0336, wR <sub>2</sub> = 0.0845<br>0.57/-0.51                                                                                                                                                                                                                                                                                                                                                                          |
| <b>2d[GaCl<sub>4</sub>]<sup>-</sup>(<i>n</i>-hex)<sub>0.4</sub></b><br>C <sub>157</sub> Cl <sub>20</sub> GasH <sub>213</sub> Ni <sub>5</sub> P <sub>20</sub><br>4070.81<br>122.9(3)<br>monoclinic<br>P2 <sub>1</sub> /n<br>23.5978(3)<br>26.0263(3)<br>31.9826(3)<br>90<br>107.3890(10)<br>90<br>18744.8(4)<br>4<br>1.442<br>5.898<br>8360.0<br>0.272 × 0.077 × 0.057<br>Cu Kα (λ = 1.54184)<br>6.792 to 148.454<br>-29 ≤ h ≤ 29, -23 ≤ k ≤ 32, -29 ≤ l ≤ 39<br>104837<br>36561 [R <sub>int</sub> = 0.0598, R <sub>sigma</sub> = 0.0597]<br>36561/288/1975<br>1.022<br>R <sub>1</sub> = 0.0543, wR <sub>2</sub> = 0.1327<br>R <sub>1</sub> = 0.0739, wR <sub>2</sub> = 0.1437<br>0.92/-0.73 | <b>2e[TEF]</b><br>C <sub>140</sub> H <sub>140</sub> Al <sub>4</sub> F <sub>144</sub> Ni <sub>4</sub> O <sub>16</sub> P <sub>16</sub><br>5652.79<br>123.01(10)<br>triclinic<br>P-1<br>19.4947(11)<br>24.9584(14)<br>25.7834(14)<br>64.002(6)<br>73.289(5)<br>71.681(5)<br>10538.0(12)<br>2<br>1.781<br>4.384<br>5616.0<br>0.242 × 0.23 × 0.179<br>Cu Kβ (λ = 1.39222)<br>4.752 to 150.572<br>-21 ≤ h ≤ 27, -33 ≤ k ≤ 34, -35 ≤ l ≤ 34<br>110292<br>56269 [R <sub>int</sub> = 0.0648, R <sub>sigma</sub> = 0.0843]<br>56269/4534/4740<br>1.029<br>R <sub>1</sub> = 0.0714, wR <sub>2</sub> = 0.1818<br>R <sub>1</sub> = 0.1111, wR <sub>2</sub> = 0.2293<br>0.99/-0.91 | <b>2f<sub>endo</sub>[TEF]</b><br>C <sub>39</sub> H <sub>34</sub> AlClF <sub>36</sub> NiO <sub>4</sub> P <sub>4</sub><br>1495.68<br>293(2)<br>monoclinic<br>P2 <sub>1</sub> /n<br>15.4562(5)<br>12.8245(4)<br>28.0794(11)<br>90<br>96.820(3)<br>90<br>5526.5(3)<br>4<br>1.798<br>0.693<br>2968.0<br>0.702 × 0.659 × 0.368<br>Mo Kα (λ = 0.71073)<br>6.568 to 64.97<br>-19 ≤ h ≤ 22, -18 ≤ k ≤ 19, -42 ≤ l ≤ 40<br>53485<br>18349 [R <sub>int</sub> = 0.0236, R <sub>sigma</sub> = 0.0300]<br>18349/1072/1457<br>1.038<br>R <sub>1</sub> = 0.0778, wR <sub>2</sub> = 0.2092<br>R <sub>1</sub> = 0.0958, wR <sub>2</sub> = 0.2252<br>1.85/-1.30                                                                                       |
| <b>3a[TEF]</b><br>C <sub>50</sub> H <sub>58</sub> AlBr <sub>3</sub> F <sub>36</sub> Ni <sub>2</sub> O <sub>4</sub> P <sub>4</sub><br>1914.97<br>293(2)<br>triclinic<br>P $\bar{1}$<br>10.5753(4)<br>17.8782(7)<br>20.7325(8)<br>108.035(3)<br>103.509(3)<br>101.557(3)<br>3462.9(2)<br>2<br>1.837<br>2.518<br>1896<br>0.328 × 0.177 × 0.141<br>Mo Kα (λ = 0.71073)<br>6.538 to 64.868<br>-13 ≤ h ≤ 15, -18 ≤ k ≤ 26, -31 ≤ l ≤ 29<br>31980<br>21606 [R <sub>int</sub> = 0.0258, R <sub>sigma</sub> = 0.0680]<br>21606/18/974<br>1.053<br>R <sub>1</sub> = 0.0497, wR <sub>2</sub> = 0.0865<br>R <sub>1</sub> = 0.0799, wR <sub>2</sub> = 0.0978<br>1.00/-0.58                               | <b>3b[GaCl<sub>4</sub>]</b><br>C <sub>46</sub> H <sub>66</sub> Cl <sub>5</sub> Ga <sub>3</sub> Ni <sub>2</sub> P <sub>4</sub><br>1107.25<br>122.99(13)<br>triclinic<br>P-1<br>10.4773(5)<br>14.5388(8)<br>18.7053(11)<br>105.393(5)<br>105.799(5)<br>97.951(5)<br>2574.3(3)<br>2<br>1.428<br>7.587<br>1148.0<br>0.3 × 0.2 × 0.1 (estimated)<br>Cu Kβ (λ = 1.39222)<br>4.676 to 119.1<br>-11 ≤ h ≤ 12, -17 ≤ k ≤ 17, -22 ≤ l ≤ 12<br>16125<br>9775 [R <sub>int</sub> = 0.0394, R <sub>sigma</sub> = 0.0718]<br>9775/151/646<br>1.026<br>R <sub>1</sub> = 0.0561, wR <sub>2</sub> = 0.1344<br>R <sub>1</sub> = 0.0761, wR <sub>2</sub> = 0.1493<br>0.83/-0.51          | <b>4[GaCl<sub>4</sub>]<sup>-</sup>(<i>o</i>-DFB)<sub>0.33</sub><sup>-</sup>(<i>n</i>-pent)<sub>0.33</sub></b><br>C <sub>113</sub> Cl <sub>12</sub> F <sub>2</sub> Ga <sub>3</sub> H <sub>190</sub> Ni <sub>6</sub> P <sub>9</sub><br>2852.19<br>293(2)<br>trigonal<br>R-3<br>62.3366(8)<br>62.3366(8)<br>17.8833(5)<br>90<br>90<br>120<br>60182(2)<br>18<br>1.417<br>5.121<br>26748.0<br>0.538 × 0.351 × 0.292<br>CuKα (λ = 1.54184)<br>6.572 to 149.804<br>-75 ≤ h ≤ 76, -71 ≤ k ≤ 77, -20 ≤ l ≤ 17<br>98135<br>26099 [R <sub>int</sub> = 0.0603, R <sub>sigma</sub> = 0.0432]<br>26099/408/1556<br>1.047<br>R <sub>1</sub> = 0.0477, wR <sub>2</sub> = 0.1250<br>R <sub>1</sub> = 0.0532, wR <sub>2</sub> = 0.1326<br>0.92/-0.63 |

## SUPPORTING INFORMATION

1

A different polymorph of **1** has already been described previously.<sup>[12]</sup> Compound **1** crystallised from a concentrated *n*-hexane solution, which was stored at  $-30\text{ }^{\circ}\text{C}$  for one day. It forms large bright red blocks with the space group  $P2_1/n$  containing a single molecule in the asymmetric unit. The respective solid state structure is shown in Figures SI 11.

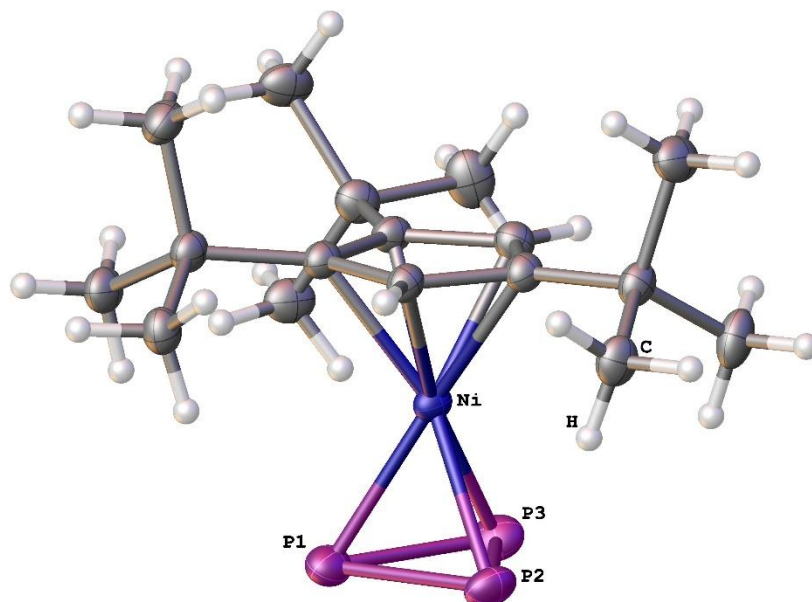

Figure SI 11: The asymmetric unit of **1**, ADPs are drawn at the 50% probability level; Selected bond lengths [ $\text{\AA}$ ] and angles [ $^{\circ}$ ]: P1-P2 2.1410(8), P1-P3 2.1425(7), P2-P3 2.1488(8), Ni-P1 2.2427(5), Ni-P2 2.2455(6), Ni-P3 2.2357(6), P1-P2-P3 59.93(3), P2-P3-P1 59.86(3), P2-P1-P3 60.22(3).

**2a[OTf]**

Compound **2a[OTf]** crystallised from a concentrated solution in *o*-DFB, which was layered with *n*-hexane (8:1) and stored for several days at room temperature. It crystallises as large dark red plates with the space group  $P2_1/n$  containing one anion and one cation in the asymmetric unit. The solid state structure is shown in Figure SI 12.

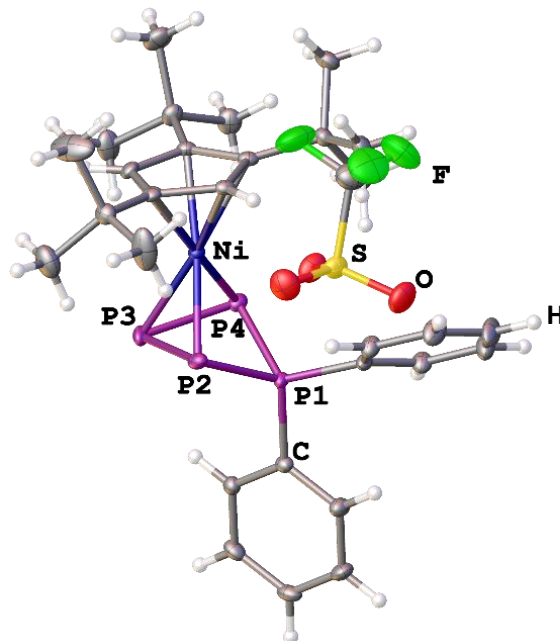

Figure SI 12: The asymmetric unit of **2a[OTf]**, ADPs are drawn at the 50% probability level; Selected bond lengths [ $\text{\AA}$ ] and angles [ $^{\circ}$ ]: P1-P2 2.1723(6), P1-P4 2.1740(5), P2-P3 2.1984(6), P3-P4 2.1889(6), P2-Ni 2.2743(5), P3-Ni 2.2154(5), P4-Ni 2.2778(5), P1-P2-P3 83.66(2), P2-P3-P4 87.48(2), P3-P4-P1 83.84(2), P2-P1-P4 88.51(2), P3-P4-P2-P1 136.21(4).

## SUPPORTING INFORMATION

**2a[SbF<sub>6</sub>]**

Compound **2a**[SbF<sub>6</sub>] crystallised from a concentrated solution in *o*-DFB, which was layered with *n*-hexane (8:1) and stored for several days at room temperature. It crystallises as large dark red plates with the space group  $P2_1/n$  containing one anion and one cation in the asymmetric unit. The solid state structure is shown in Figure SI 13.

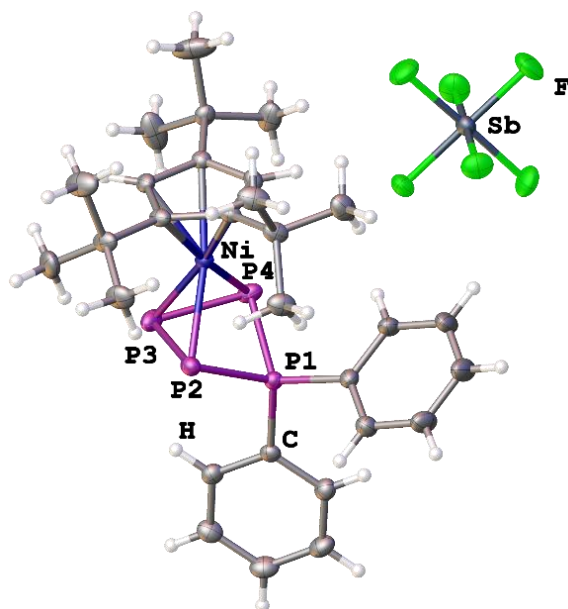

Figure SI 13: Asymmetric unit of **2a**[SbF<sub>6</sub>], ADPs are drawn at the 50% probability level; Selected bond lengths [Å] and angles [°]: P1-P2 2.1727(7), P1-P4 2.1737(7), P2-P3 2.1946(8), P3-P4 2.2002(8), P2-Ni 2.2787(6), P3-Ni 2.2130(6), P4-Ni 2.2786(6), P1-P2-P3 83.39(3), P2-P3-P4 87.58(3), P3-P4-P1 83.23(3), P2-P1-P4 88.80(3), P3-P4-P2-P1 135.47(4).

**2a[TEF]**

Compound **2a**[TEF] crystallised by slowly evaporating the solvent of a CH<sub>2</sub>Cl<sub>2</sub> solution. Thus, a few red platelets of **2a**[TEF] could be obtained, which crystallises in the monoclinic space group  $P2_1/n$  with two anions and two cations in the asymmetric unit. The structure in solid state is shown in Figure SI 14. The severe disorder within one of the anions was treated with restraints. The cations are enantiomers to each other and besides that their structural parameters differ only very slightly. Thus, these structural parameters are given for only one of them.

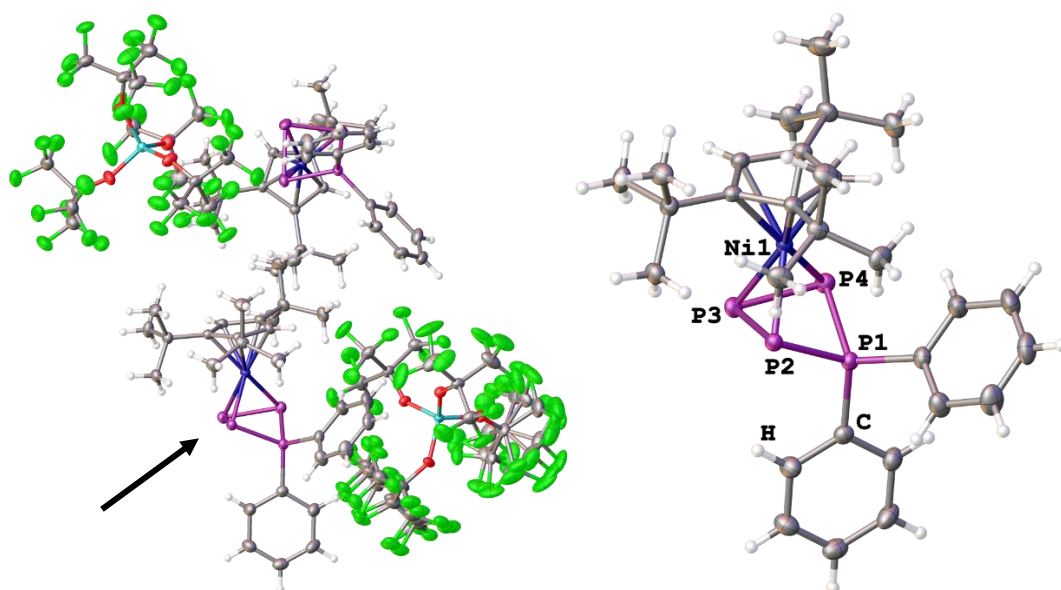

Figure SI 14: Asymmetric unit of **2a**[TEF] (left) and the marked cation denoted with Ni1 (right), ADPs are drawn at the 50% probability level; Selected bond lengths [Å] and angles [°]: P1-P2 2.1659(6), P1-P4 2.1733(6), P2-P3 2.1988(6), P3-P4 2.1967(6), P2-Ni1 2.2598(5), P3-Ni1 2.2192(5), P4-Ni1 2.2867(5), P1-P2-P3 83.56(2), P2-P3-P4 86.93(3), P3-P4-P1 83.44(2), P2-P1-P4 88.35(3), P3-P4-P2-P1 134.70(3).

## SUPPORTING INFORMATION

**2a**[GaCl<sub>4</sub>]

Compound **2a**[GaCl<sub>4</sub>] crystallised from a concentrated solution in *o*-DFB, which was layered with *n*-hexane (6:1) and stored for several days at room temperature. It crystallises as large dark red plates with the space group  $P2_1/n$  containing one anion and one cation in the asymmetric unit. The structure in solid state is shown in Figure SI 15.

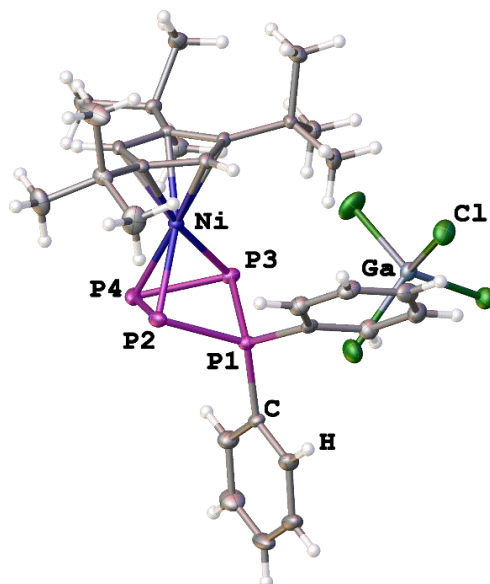

Figure SI 15: Asymmetric unit of **2a**[GaCl<sub>4</sub>], ADPs are drawn at the 50% probability level; Selected bond lengths [Å] and angles [°]: P1-P2 2.1790(20), P1-P4 2.1731(14), P2-P3 2.1862(16), P3-P4 2.1940(20), P2-Ni 2.2873(12), P3-Ni 2.2281(9), P4-Ni 2.2780(20), P1-P2-P3 84.85(9), P2-P3-P4 87.54(11), P3-P4-P1 84.80(8), P2-P1-P4 88.17(9), P3-P4-P2-P1 138.83(11).

**2c**[GaCl<sub>4</sub>](*o*-DFB)<sub>0.5</sub>

Compound **2c**[GaCl<sub>4</sub>] crystallised as an *o*-DFB solvate from a concentrated solution in *o*-DFB, which was layered with *n*-hexane (6:1) and stored at −30 °C for several days. It forms large dark red plates with the space group  $P2_1/n$  containing one anion, one cation and half a molecule of *o*-DFB in the asymmetric unit. Slight disorder within the [GaCl<sub>4</sub>]<sup>−</sup> anion could be refined without restraints, but DFIX restraints were used for two of the C–H bonds in the disordered *o*-DFB molecule. The structure in solid state is shown in Figure SI 16.

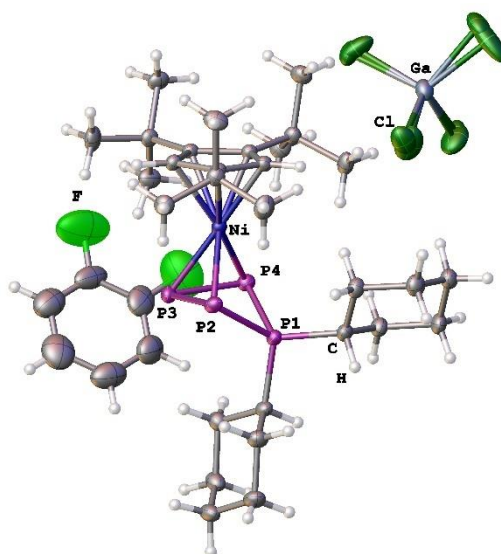

Figure SI 16: Asymmetric unit of **2c**[GaCl<sub>4</sub>](*o*-DFB)<sub>0.5</sub>, ADPs are drawn at the 50% probability level; Selected bond lengths [Å] and angles [°]: P1-P2 2.1738(6), P1-P4 2.1827(5), P2-P3 2.1922(5), P3-P4 2.1951(6), P2-Ni 2.2788(4), P3-Ni 2.2186(5), P4-Ni 2.2854(4), P1-P2-P3 83.59(2), P2-P3-P4 86.98(2), P3-P4-P1 83.32(2), P2-P1-P4 87.75(2), P3-P4-P2-P1 133.96(3).

## SUPPORTING INFORMATION

**2d**[GaCl<sub>4</sub>] $\cdot$ (*n*-hex)<sub>0.4</sub>

Layering a concentrated CH<sub>2</sub>Cl<sub>2</sub> solution of **2d**[GaCl<sub>4</sub>] with *n*-hexane (5:1) and storing it at  $-30\text{ }^{\circ}\text{C}$  for two weeks leads to formation of light red crystals of **2d**[GaCl<sub>4</sub>] $\cdot$ (*n*-hex)<sub>0.4</sub>. It crystallises in the monoclinic space group P2<sub>1</sub>/n with five cations, five anions and two *n*-hexane molecules in the asymmetric unit. Disorder within the [GaCl<sub>4</sub>]<sup>-</sup> anions and one of the Cp<sup>'''</sup> ligands was treated with restraints. Both *n*-hexane molecules are too disordered for proper modelling and thus have been treated with the implemented solvent mask procedure in Olex2.<sup>[9]</sup> As the structural parameters within the cations only differ very slightly, just those for one of them (Ni1) are given and the structure of the asymmetric unit and the respective cation are provided in Figure SI 17.

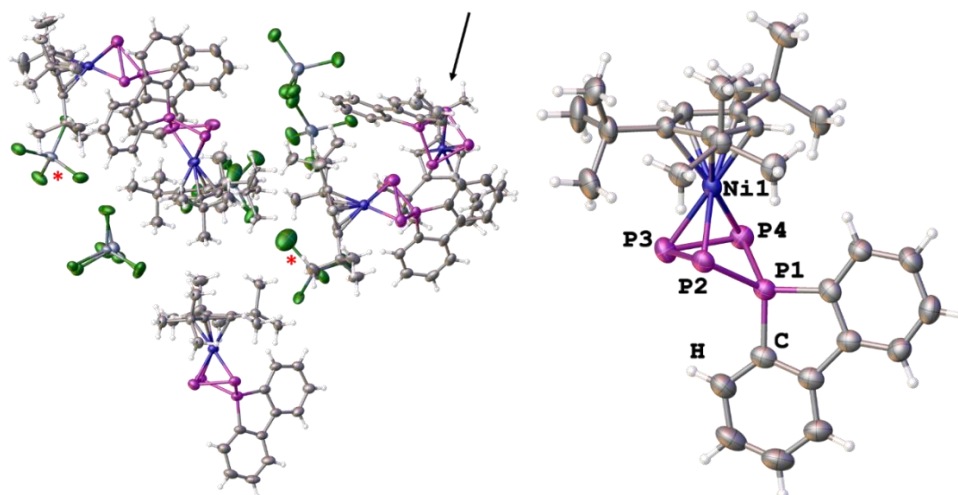

Figure SI 17: Asymmetric unit of **2d**[GaCl<sub>4</sub>](*n*-hex)<sub>0.4</sub>, where \* marks two disordered parts of one [GaCl<sub>4</sub>]<sup>-</sup> anion and the arrow points to the cation denoted with Ni1 (left) and the respective structure of this cation (right), ADPs are drawn at the 50% probability level; Selected bond lengths [Å] and angles [°]: P1-P2 2.1629(14), P1-P4 2.1620(14), P2-P3 2.2078(15), P3-P4 2.1919(14), P2-Ni 2.2642(12), P3-Ni 2.2343(13), P4-Ni 2.2952(12), P1-P2-P3 82.59(6), P2-P3-P4 87.53(5), P3-P4-P1 82.97(6), P2-P1-P4 89.46(5), P3-P4-P2-P1 134.74(8).

**2e**[TEF]

Red crystals of **2e**[TEF] could be obtained from layering a concentrated solution in *o*-DFB with *n*-hexane (1:10) and storing it at  $4\text{ }^{\circ}\text{C}$  for ten days. **2e**[TEF] crystallises in the triclinic space group  $P\bar{1}$  with four cations and four anions in the asymmetric unit. Heavy disorder within the anions was treated with restraints, but still leads to comparably bad R values. Thus, structural parameters were considered carefully. As the structural parameters within the cations only differ very slightly, just those for one of them (Ni1) are given and the structure of the asymmetric unit and the respective cation are provided in Figure SI 18.

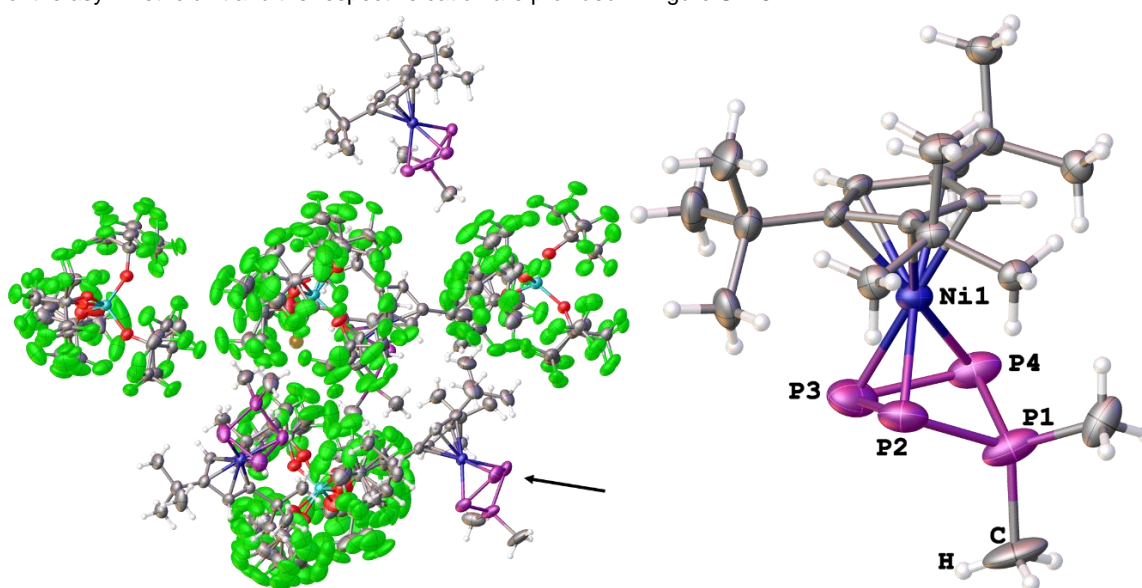

Figure SI 18: Asymmetric unit of **2e**[TEF], where the arrow points to the cation denoted with Ni1 (left) and the respective structure of this cation (right), ADPs are drawn at the 50% probability level; Selected bond lengths [Å] and angles [°]: P1-P2 2.153(2), P1-P4 2.149(2), P2-P3 2.188(2), P3-P4 2.195(2), P2-Ni 2.260(1), P3-Ni 2.199(1), P4-Ni 2.274(1), P1-P2-P3 84.37(9), P2-P3-P4 87.50(8), P3-P4-P1 84.28(10), P2-P1-P4 89.58(7), P3-P4-P2-P1 139.25(9).



## SUPPORTING INFORMATION

**2f<sub>endo</sub>[TEF]**

Layering a concentrated solution of **2f**[TEF] in *o*-DFB with *n*-hexane and storing the solution at 4 °C for two weeks, yields bright red crystals of the *endo*-Ph isomer of **2f**[TEF] (Figure SI 19). The X-ray structural analysis of **2f<sub>endo</sub>**[TEF] revealed its incommensurate modulated structure in the solid state (Figure SI 20), but the solution and refinement of the average structure yielded a reasonable structural model ( $R_1 = 7.8\%$ ), which may be discussed. Structural parameters were considered carefully. The average structure of **2f<sub>endo</sub>**[TEF] forms a monoclinic lattice with the space group  $P2_1/n$ , where the asymmetric unit contains one anion and one cation. As a result of the modulation, the structure appears heavily disordered, which especially counts for the [TEF]<sup>-</sup> anion. Disorder has been treated with restraints.

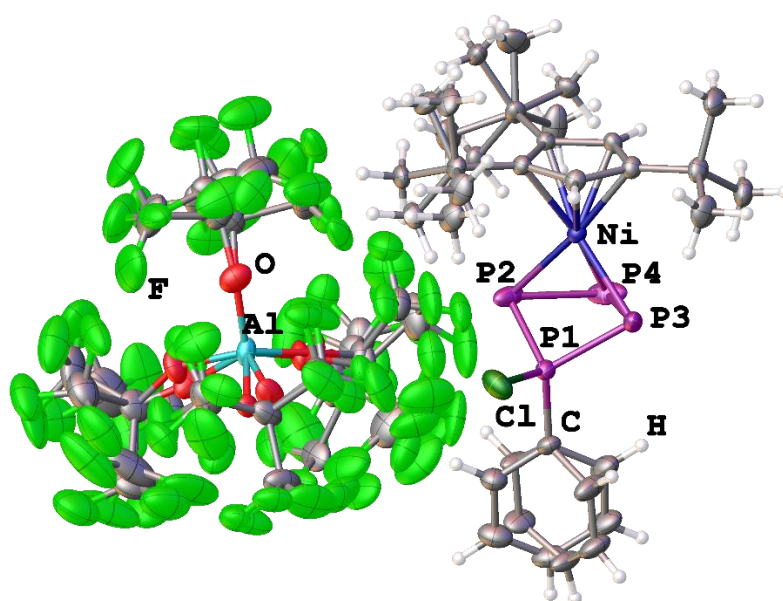

Figure SI 3: Asymmetric unit of the average structure solution of **2f<sub>endo</sub>**[TEF] with ADPs drawn at the 50% probability level; Selected bond lengths [Å] and angles [°]: P1-P2 2.1462(11), P1-P4 2.1471(11), P2-P3 2.1966(17), P3-P4 2.2038(16), P2-Ni 2.2684(9), P3-Ni 2.2141(9), P4-Ni 2.2708(9), P1-Cl 2.0227(11), P1-P2-P3 79.86(5), P2-P3-P4 88.76(5), P3-P4-P1 79.68(4), P2-P1-P4 91.60 (5), P2-P3-P4-P1 130.52(7).

## SUPPORTING INFORMATION

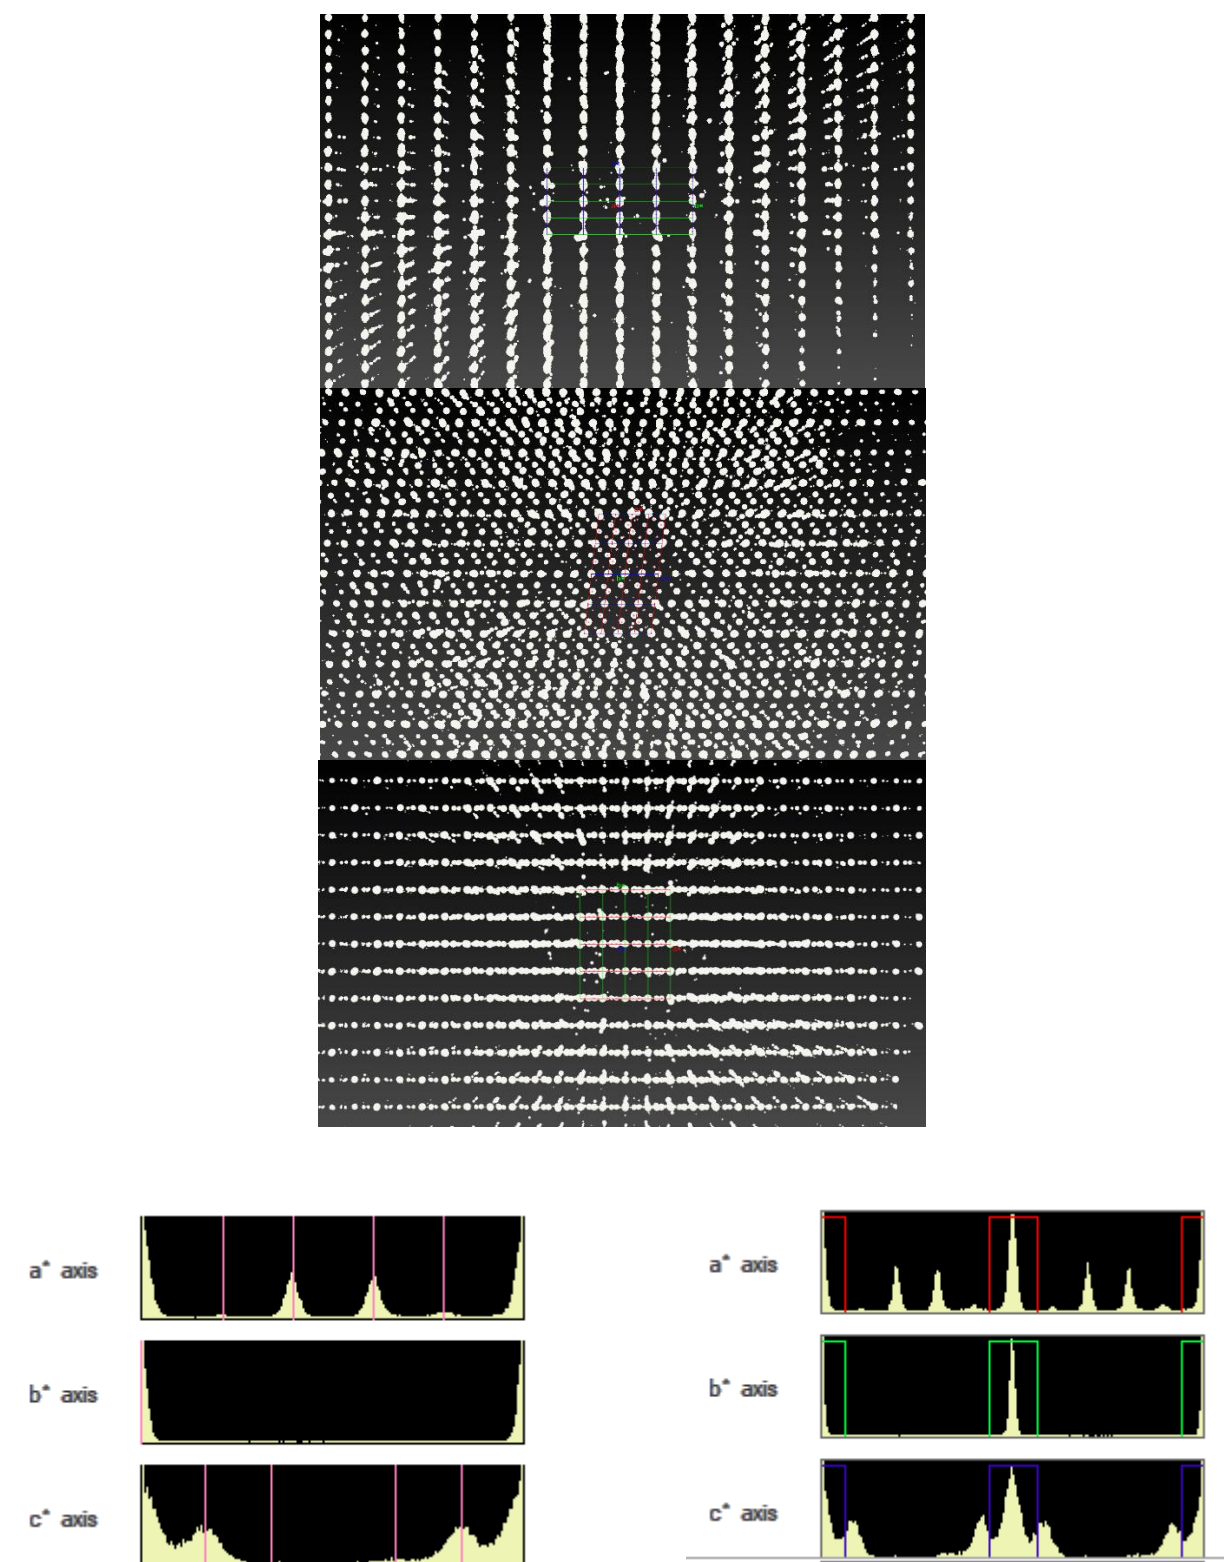

Figure SI 20: Views of the reciprocal space of  $2f_{\text{endo}}[\text{TEF}]$  along the  $a^*$ (top),  $b^*$ (middle) and  $c^*$ (bottom) axis, with clearly visible satellite peaks (along  $a^*$  and  $c^*$ ) arising from the incommensurate structure of this compound; Bottom: Intensity distribution histograms with (left) and without (right) the refined modulation vector  $0.393, 0.0, 0.169$  of order 2.

## SUPPORTING INFORMATION

**3a**[TEF]

Storing a solution of **3a**[TEF] in CH<sub>2</sub>Cl<sub>2</sub> layered with *n*-hexane at room temperature for six days yield dark blackish red crystals. **3a**[TEF] crystallises in the triclinic space group  $P\bar{1}$  with one cation and one anion in the asymmetric unit. Disorder within the [TEF]<sup>-</sup> anion was treated with SIMU restraints and the solid state structure is shown in Figure SI 21.

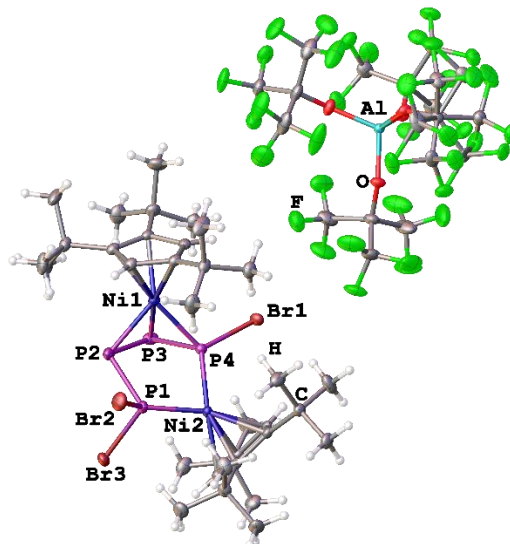

Figure SI 21: Asymmetric unit of **3a**[TEF], ADPs are drawn at the 50% probability level; Selected bond lengths [Å] and angles [°]: P1-P2 2.2228(11), P2-P3 2.1653(12), P3-P4 2.1623(10), P2-Ni1 2.2562(8), P3-Ni1 2.2691(8), P4-Ni1 2.2209(8), P1-Ni2 2.1035(8), P4-Ni2 2.1573(8), P1-Br2 2.2161(8), P1-Br3 2.2194(8), P4-Br1 2.2146(8), P1-P2-P3 100.82(4), P2-P3-P4 86.47(4), P3-P4-Ni2 116.62(4), P1-Ni2-P4 84.96(3), P2-P1-Ni2 117.12(4), Br2-P1-Br3 100.82(3), P3-P4-P2-P1 135.30(6), P3-P4-P2-Ni2 126.93(7).

**3b**[GaCl<sub>4</sub>]

Brownish crystals of **3b**[GaCl<sub>4</sub>] are obtained from layering a concentrated solution in *o*-DFB with *n*-hexane (6:1) and storing it for two weeks at room temperature. **3b**[GaCl<sub>4</sub>] crystallises in the triclinic space group  $P\bar{1}$  with one cation and one anion in the asymmetric unit (Figure SI 22). Disorder within the 'Bu groups and the anion were treated with DFIX and SIMU restraints. The crystal movie recording before the X-ray diffraction experiment failed due to issues with the camera. Thus, the dimensions of the crystal are therefore estimated and only multi-scan absorption correction was applied.

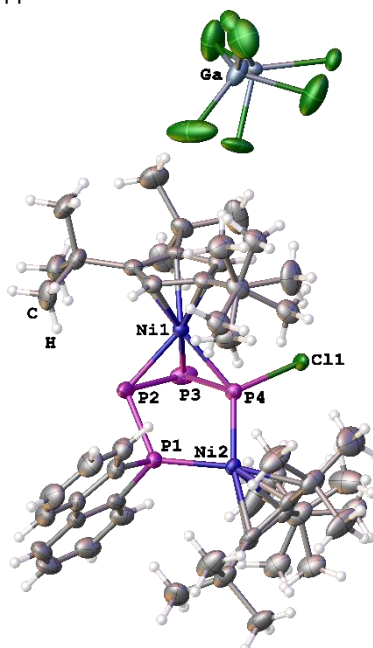

Figure SI 22: Asymmetric unit of **3b**[GaCl<sub>4</sub>], ADPs are drawn at the 50% probability level; Selected bond lengths [Å] and angles [°]: P1-P2 2.2387(16), P2-P3 2.1450 (20), P3-P4 2.1444(16), P2-Ni1 2.2525(13), P3-Ni1 2.2617(13), P4-Ni1 2.2167(12), P1-Ni2 2.1420(12), P4-Ni2 2.1470(13), P4-Cl1 2.0738(16), P1-P2-P3 100.66(7), P2-P3-P4 85.34(6), P3-P4-Ni2 116.16(7), P1-Ni2-P4 85.79(5), P2-P1-Ni2 113.88(5), P3-P4-P2-P1 -130.58(8), P3-P4-P2-Ni2 -124.67(9).

## SUPPORTING INFORMATION

 $4[\text{GaCl}_4] \cdot (\text{o-DFB})_{0.33} \cdot (\text{n-pent})_{0.33}$ 

Layering a concentrated solution of  $4[\text{GaCl}_4]$  with *n*-pentane (8:1) and storing it for four weeks at room temperature afforded dark brownish green crystals of the solvate  $4[\text{GaCl}_4] \cdot (\text{o-DFB})_{0.33} \cdot (\text{n-pent})_{0.33}$ . This compound has the space group  $R\bar{3}$  and the asymmetric unit contains three cations, three anions, an *o*-DFB and a strongly disordered *n*-pentane molecule, which was treated with the implemented solvent mask procedure in Olex2 (Figure SI 23).<sup>[9]</sup> Disorder within the Cp''' ligands, the anions and two of the three  $\text{P}_3$  middle decks was treated with restraints and the cation without disorder is selected for description of structural parameters.

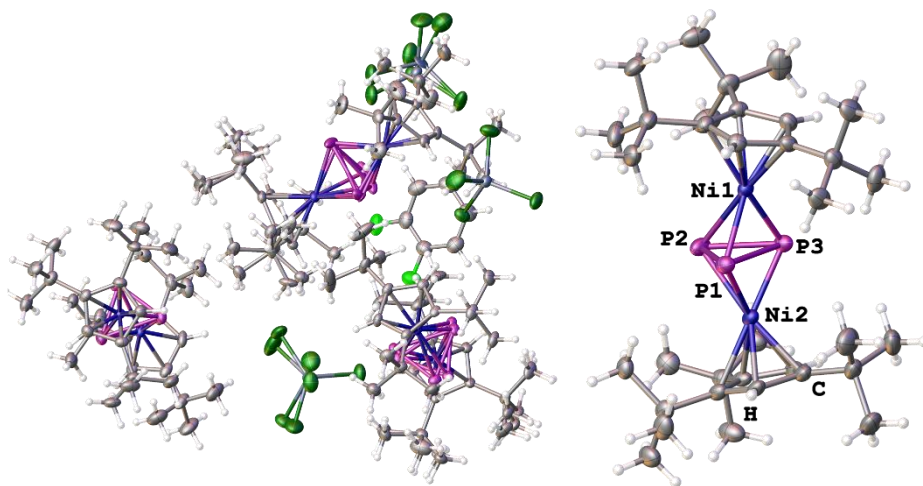

Figure SI 23: Asymmetric unit of  $4[\text{GaCl}_4] \cdot (\text{o-DFB})_{0.33} \cdot (\text{n-pent})_{0.33}$  (left) and the cation without disorder (right), ADPs are drawn at the 50% probability level; Selected bond lengths [Å] and angles [°]: P1-P2 2.2021(11), P1-P3 2.5385(10), P2-P3 2.1975(11), P1-Ni1 2.1842(9), P2-Ni1 2.3566(9), P3-Ni1 2.1831(9), P1-Ni2 2.1746(8), P2-Ni2 2.3920(9), P3-Ni2 2.1786(9), P1-P2-P3 70.48(5), P2-P3-P1 54.84(4), P3-P1-P2 54.68(5), P2-P1-P3-Ni1 82.51(5), P2-P3-P1-Ni2 84.28(6), fold angle in between the planes of the Cp''' ligands: 24.48(15).

## SUPPORTING INFORMATION

## Details on computational results

Calculations were carried out using the Gaussian09 software package<sup>[13]</sup> at the DFT level by means of either the density functional BP86<sup>[14]</sup> or the hybrid density functional B3LYP.<sup>[14,15]</sup> The def2SVP<sup>[16]</sup> basis set was used for calculations involving both isomers of **2f** and **2g** and the structures of **3a** and **3b**. The def2TZVP<sup>[16]</sup> basis set was used for calculations on the possible reaction mechanism. Implicit solvent correction was applied via a polarisable continuum model for CH<sub>2</sub>Cl<sub>2</sub>.<sup>[17]</sup> NBO analysis of **3a** and **3b** was conducted with the NBO6 software package.<sup>[18]</sup> Stationary points were verified by analytical frequency calculations. The transition state **TS2** was verified by slightly changing its molecular geometry along its imaginary frequency and then performing geometry optimisations on the obtained structures.

Cartesian coordinates for all optimised structures:

*[CpNi( $\eta^3$ -P<sub>3</sub>)]:*

BP86/def2TZVP: Energies/H = -2726.415940, Enthalpies/H = -2726.414996, Free Energies/H = -2726.462662, ZPVE/ kJ/mol = 227.85 (ZPVE = zero point vibrational energies)

| Symbol | X          | Y          | Z          |
|--------|------------|------------|------------|
| Ni     | 0.2315880  | 0.0003550  | -0.0002530 |
| P      | -1.6581020 | 0.1405030  | 1.2453800  |
| P      | -1.6588170 | -1.1486330 | -0.5009340 |
| P      | -1.6599450 | 1.0076390  | -0.7439290 |
| C      | 1.9482110  | -1.2180120 | -0.0684430 |
| C      | 1.9470460  | 0.9456500  | 0.7719540  |
| C      | 1.9476030  | -0.4439540 | 1.1363480  |
| H      | 1.9453280  | -0.8386160 | 2.1488960  |
| C      | 1.9472350  | -0.3099050 | -1.1810320 |
| C      | 1.9493720  | 1.0258080  | -0.6589600 |
| H      | 1.9451030  | 1.9402720  | -1.2462460 |
| H      | 1.9476710  | 1.7873270  | 1.4593890  |
| H      | 1.9452950  | -2.3031370 | -0.1298310 |
| H      | 1.9483070  | -0.5859450 | -2.2320710 |

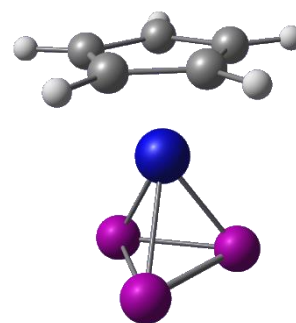

*[Me<sub>2</sub>P]<sup>+</sup>:*

BP86/def2TZVP: Energies/H = -420.933417, Enthalpies/H = -420.932473, Free Energies/H = -420.966318, ZPVE/ kJ/mol = 182.86

| Symbol | X          | Y          | Z          |
|--------|------------|------------|------------|
| C      | 1.3970920  | -0.4638670 | -0.0245410 |
| H      | 2.2782590  | -0.0007810 | -0.4883890 |
| H      | 1.6232810  | -0.5021650 | 1.0746510  |
| H      | 1.2053900  | -1.4928920 | -0.3534430 |
| C      | -1.3971220 | -0.4638380 | 0.0245590  |
| H      | -2.2786000 | -0.0005020 | 0.4875270  |
| H      | -1.6224530 | -0.5030140 | -1.0747920 |
| H      | -1.2055490 | -1.4926400 | 0.3542600  |

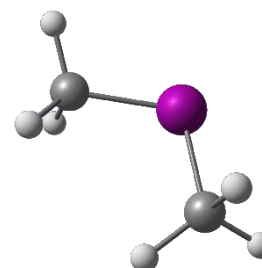

## SUPPORTING INFORMATION

 $[\text{CpNi}(\eta^3\text{-P}_4\text{Me}_2)]^+$  (**I2**):

BP86/def2TZVP: Energies/H = -3147.407361, Enthalpies/H = -3147.406417, Free Energies/H = -3147.467349, ZPVE/ kJ/mol = 424.86

| Symbol | X          | Y          | Z          |
|--------|------------|------------|------------|
| Ni     | -1.1354880 | 0.0281460  | -0.0004480 |
| P      | 3.2133650  | -0.0222500 | 0.0308580  |
| P      | -0.1746150 | -1.7721380 | 1.1066150  |
| P      | 1.0156070  | -0.3347520 | 0.0516700  |
| P      | -0.1268880 | -1.7511780 | -1.0851130 |
| C      | -2.0787760 | 1.6676670  | 0.9182250  |
| C      | -3.2114140 | 0.0616430  | -0.3109570 |
| C      | -2.9171680 | 0.5176520  | 1.0209600  |
| H      | -3.2587120 | 0.0533110  | 1.9418490  |
| C      | -1.8646440 | 1.9345840  | -0.4837250 |
| C      | -2.5725560 | 0.9507550  | -1.2396520 |
| H      | -2.6069620 | 0.8771180  | -2.3228540 |
| C      | 3.3926220  | 1.2146770  | 1.3918260  |
| C      | 3.3771280  | 1.0295710  | -1.4799650 |
| H      | 4.4457130  | 1.2900930  | -1.5432480 |
| H      | 3.1137260  | 0.4437930  | -2.3698380 |
| H      | 2.7870510  | 1.9536960  | -1.4392070 |
| H      | 2.7873060  | 2.1181790  | 1.2467240  |
| H      | 3.1569080  | 0.7450120  | 2.3551140  |
| H      | 4.4580050  | 1.4950690  | 1.3970920  |
| H      | -3.8151020 | -0.8044620 | -0.5682400 |
| H      | -1.6742630 | 2.2431000  | 1.7461380  |
| H      | -1.2631750 | 2.7424850  | -0.8917120 |

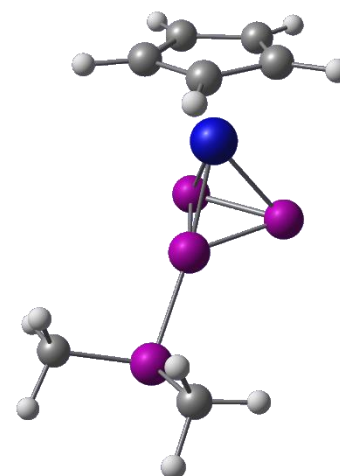 $[\text{CpNi}(\eta^3\text{-P}_4\text{Me}_2)]^+$  (**TS2**):

BP86/def2TZVP: Energies/H = -3147.399502, Enthalpies/H = -3147.398558, Free Energies/H = -3147.458166, ZPVE/ kJ/mol = 422.58

| Symbol | X          | Y          | Z          |
|--------|------------|------------|------------|
| Ni     | -1.1158950 | -0.0587770 | -0.0207480 |
| P      | 2.8839640  | 0.2073760  | 0.4226840  |
| P      | 0.4276800  | -0.7474120 | 1.3923110  |
| P      | 0.9364150  | -0.3681810 | -0.8503960 |
| P      | -0.0803630 | -2.1539330 | -0.1211310 |
| C      | -1.9847070 | 1.8377560  | -0.2372500 |
| C      | -3.1046150 | -0.0092440 | 0.5885650  |
| C      | -2.4581740 | 1.2220070  | 0.9584250  |
| H      | -2.3363370 | 1.6004450  | 1.9692870  |
| C      | -2.3647010 | 1.0024850  | -1.3555270 |
| C      | -3.0651360 | -0.1246470 | -0.8465860 |
| H      | -3.4696500 | -0.9472030 | -1.4295780 |
| C      | 2.5662740  | 2.0261340  | 0.5041300  |

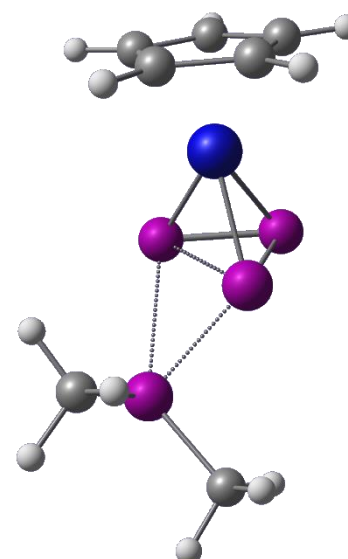



## SUPPORTING INFORMATION

|   |            |            |            |
|---|------------|------------|------------|
| C | 3.9787380  | 0.0923470  | -1.0732940 |
| H | 4.9648770  | 0.4650240  | -0.7501060 |
| H | 4.0908910  | -0.9586340 | -1.3696080 |
| H | 3.6188640  | 0.6901840  | -1.9218420 |
| H | 2.2284000  | 2.4575710  | -0.4478800 |
| H | 1.8372730  | 2.2453140  | 1.2949390  |
| H | 3.5258180  | 2.4904640  | 0.7824410  |
| H | -3.5588960 | -0.7209510 | 1.2727400  |
| H | -1.4342030 | 2.7723220  | -0.3019010 |
| H | -2.1434750 | 1.2024630  | -2.4003390 |

$[\text{CpNi}(\eta^3\text{-P}_4\text{Me}_2)]^+$  (**P2**):

BP86/def2TZVP: Energies/H = -3147.439393, Enthalpies/H = -3147.438449, Free Energies/H = -3147.496319, ZPVE/ kJ/mol = 427.63

| Symbol | X          | Y          | Z          |
|--------|------------|------------|------------|
| Ni     | -0.9306060 | -0.1157720 | -0.0000030 |
| P      | 2.0928060  | 0.4372400  | 0.0000010  |
| P      | 0.7404110  | -0.3961710 | 1.5208370  |
| P      | 0.7404220  | -0.3961780 | -1.5208400 |
| P      | 0.3468100  | -1.9608900 | -0.0000010 |
| C      | -2.1183220 | 1.4635440  | -0.7131780 |
| C      | -2.6708930 | 0.2064030  | 1.1546360  |
| C      | -2.1182840 | 1.4636190  | 0.7130680  |
| H      | -1.7690020 | 2.2662400  | 1.3563070  |
| C      | -2.6709550 | 0.2062820  | -1.1545870 |
| C      | -3.0272070 | -0.5552070 | 0.0000740  |
| H      | -3.4612400 | -1.5511810 | 0.0001370  |
| C      | 2.2680680  | 2.2462300  | -0.0000080 |
| C      | 3.7713560  | -0.2658940 | 0.0000130  |
| H      | 4.3042870  | 0.0786920  | 0.8975770  |
| H      | 3.7115030  | -1.3609100 | 0.0000340  |
| H      | 4.3042880  | 0.0786580  | -0.8975650 |
| H      | 2.8222660  | 2.5580460  | -0.8969830 |
| H      | 1.2723840  | 2.7059170  | -0.0000470 |
| H      | 2.8222020  | 2.5580630  | 0.8970000  |
| H      | -2.7949230 | -0.1038260 | 2.1886960  |
| H      | -1.7690700 | 2.2660940  | -1.3565210 |
| H      | -2.7950410 | -0.1040530 | -2.1886090 |

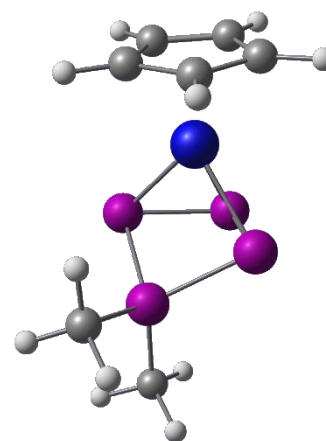

## SUPPORTING INFORMATION

$[\text{Cp}^* \text{Ni}(\eta^3\text{-P}_4\text{PhCl})]^+$  (**2f<sub>endo</sub>**):

B3LYP/def2SVP: Energies/H = -4228.944626, Enthalpies/H = -4228.943682, Free Energies/H = -4229.043422, ZPVE/ kJ/mol = 1366.27

| Symbol | X          | Y          | Z          |
|--------|------------|------------|------------|
| Ni     | -0.6055810 | 0.3257590  | 0.2996010  |
| P      | 2.3200890  | -0.1159040 | -0.3697060 |
| P      | 1.1873620  | 1.7385380  | -0.0530340 |
| P      | 0.9835470  | -1.1957870 | 1.0023560  |
| P      | 0.8255180  | 0.8235620  | 1.9506710  |
| C      | -2.1020130 | -0.7204590 | -0.8298670 |
| C      | -2.2643850 | 1.5495960  | -0.1990790 |
| C      | -1.9589300 | 0.6314310  | -1.2641200 |
| H      | -1.6844300 | 0.9353530  | -2.2679190 |
| C      | -2.4753900 | -0.6482140 | 0.6082740  |
| C      | -2.5828850 | 0.7454250  | 0.9280690  |
| H      | -2.8612410 | 1.1340260  | 1.9026140  |
| C      | -0.9531250 | -2.9411430 | -1.5459320 |
| H      | 0.0504950  | -2.5024910 | -1.6366150 |
| H      | -1.0267580 | -3.7547360 | -2.2844480 |
| H      | -1.0423020 | -3.3869200 | -0.5518670 |
| C      | -3.4336080 | -2.5463150 | -1.9283720 |
| H      | -3.7116930 | -3.0679380 | -1.0045050 |
| H      | -3.4386780 | -3.2895510 | -2.7406870 |
| H      | -4.2138290 | -1.8010640 | -2.1484150 |
| C      | -2.4510790 | 3.0575910  | -0.3087710 |
| C      | -1.7222180 | -1.3331080 | -3.2592330 |
| H      | -2.4997510 | -0.6438630 | -3.6209460 |
| H      | -1.6742010 | -2.1745300 | -3.9662250 |
| H      | -0.7504160 | -0.8188220 | -3.2940880 |
| C      | -2.9443040 | -1.6769070 | 1.6613270  |
| C      | -2.0363220 | -1.8823080 | -1.8476140 |
| C      | -2.3765040 | -3.0998510 | 1.5236260  |
| H      | -2.6894100 | -3.5995850 | 0.6004040  |
| H      | -2.7487530 | -3.7104360 | 2.3598750  |
| H      | -1.2775800 | -3.1081160 | 1.5750620  |
| C      | -2.5742190 | -1.1931200 | 3.0856490  |
| H      | -1.4871860 | -1.0604040 | 3.1995990  |
| H      | -2.8973080 | -1.9475840 | 3.8181040  |
| H      | -3.0653600 | -0.2500370 | 3.3620850  |
| C      | -4.4927450 | -1.7350610 | 1.5649240  |
| H      | -4.9402480 | -0.7468370 | 1.7510980  |
| H      | -4.8845480 | -2.4339630 | 2.3207990  |
| H      | -4.8300640 | -2.0792030 | 0.5773860  |
| C      | -1.9241810 | 3.7824970  | 0.9451240  |
| H      | -2.3976780 | 3.4129770  | 1.8672570  |
| H      | -2.1393160 | 4.8596460  | 0.8721990  |

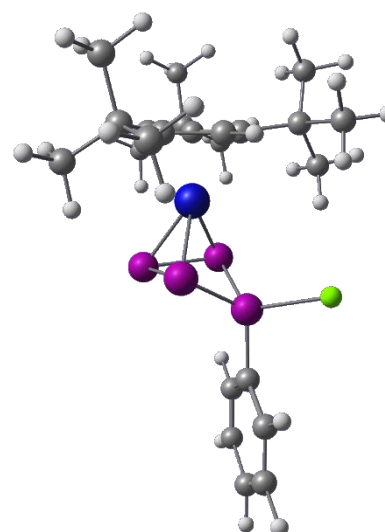

## SUPPORTING INFORMATION

|    |            |            |            |
|----|------------|------------|------------|
| H  | -0.8339770 | 3.6684830  | 1.0517830  |
| C  | -1.7662080 | 3.6269620  | -1.5647850 |
| H  | -0.6811120 | 3.4441440  | -1.5596020 |
| H  | -1.9226690 | 4.7154700  | -1.6101620 |
| H  | -2.1836190 | 3.1976540  | -2.4884310 |
| C  | -3.9802170 | 3.2938340  | -0.4255060 |
| H  | -4.3979650 | 2.7716860  | -1.3002640 |
| H  | -4.1827090 | 4.3703100  | -0.5414580 |
| H  | -4.5120830 | 2.9401360  | 0.4709930  |
| C  | 4.0852880  | -0.1212200 | 0.0449840  |
| C  | 4.9879660  | 0.6182050  | -0.7412350 |
| C  | 4.5373350  | -0.8409800 | 1.1630630  |
| C  | 6.3398140  | 0.6352540  | -0.3994720 |
| C  | 5.8953480  | -0.8195110 | 1.4915170  |
| C  | 6.7934410  | -0.0823820 | 0.7143870  |
| H  | 7.0428510  | 1.2093740  | -1.0068600 |
| H  | 6.2493380  | -1.3831770 | 2.3573140  |
| Cl | 2.2879980  | -0.7214080 | -2.3554720 |
| H  | 4.6432220  | 1.1720540  | -1.6172070 |
| H  | 7.8541170  | -0.0674110 | 0.9755350  |
| H  | 3.8422460  | -1.4193830 | 1.7757340  |

$[\text{Cp}^{\text{***}}\text{Ni}(\eta^3\text{-P}_4\text{ClPh})]^{\text{+}}$  (**2f<sub>exo</sub>**):

B3LYP/def2SVP: Energies/H = -4228.942000, Enthalpies/H = -4228.941056, Free Energies/H = -4229.037902, ZPVE/ kJ/mol = 1368.80

| Symbol | X          | Y          | Z          |
|--------|------------|------------|------------|
| Ni     | -0.5924970 | -0.5354360 | -0.3188020 |
| P      | 2.2987130  | -0.8281050 | -0.8802510 |
| P      | 0.8914180  | -2.3023750 | -0.0791030 |
| P      | 0.7229040  | 0.0512030  | -2.1315490 |
| P      | -0.1978040 | -1.9732490 | -1.9991920 |
| C      | -1.3172230 | 1.2739020  | 0.6013300  |
| C      | -1.9622430 | -0.8991660 | 1.2606660  |
| C      | -1.1242600 | 0.2315880  | 1.5565660  |
| H      | -0.4665750 | 0.2931250  | 2.4159140  |
| C      | -2.2904240 | 0.7439970  | -0.3906760 |
| C      | -2.6654090 | -0.5617320 | 0.0717010  |
| H      | -3.3851690 | -1.2062250 | -0.4230900 |
| C      | 0.3127610  | 3.0969480  | -0.2652300 |
| H      | 1.1999490  | 2.4476560  | -0.2398050 |
| H      | 0.6504170  | 4.1268040  | -0.0695810 |
| H      | -0.1026880 | 3.0687780  | -1.2770620 |
| C      | -1.8273830 | 3.7215140  | 0.9518750  |
| H      | -2.3635330 | 3.8896240  | 0.0109470  |
| H      | -1.3942530 | 4.6859990  | 1.2586160  |

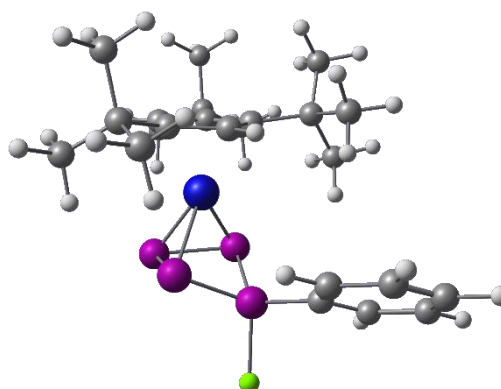

## SUPPORTING INFORMATION

---

|    |            |            |            |
|----|------------|------------|------------|
| H  | -2.5603310 | 3.4233500  | 1.7175640  |
| C  | -2.2343680 | -2.0982030 | 2.1596430  |
| C  | 0.0748100  | 2.7006570  | 2.1665510  |
| H  | -0.5814870 | 2.4925680  | 3.0249400  |
| H  | 0.4999780  | 3.7046650  | 2.3117350  |
| H  | 0.9114840  | 1.9876160  | 2.1809720  |
| C  | -3.0641310 | 1.3593220  | -1.5776220 |
| C  | -0.6948950 | 2.6727470  | 0.8253740  |
| C  | -2.3009480 | 2.4187330  | -2.3915220 |
| H  | -2.0616760 | 3.3180370  | -1.8143040 |
| H  | -2.9271340 | 2.7380770  | -3.2380930 |
| H  | -1.3667760 | 2.0126180  | -2.8073570 |
| C  | -3.4895820 | 0.2573820  | -2.5795990 |
| H  | -2.6238100 | -0.2864420 | -2.9871760 |
| H  | -4.0169930 | 0.7255310  | -3.4237380 |
| H  | -4.1801070 | -0.4775610 | -2.1429100 |
| C  | -4.3612800 | 1.9828220  | -0.9946610 |
| H  | -4.9678780 | 1.2229200  | -0.4785880 |
| H  | -4.9671580 | 2.4033320  | -1.8127310 |
| H  | -4.1489510 | 2.7889240  | -0.2802840 |
| C  | -2.4663360 | -3.3806280 | 1.3372400  |
| H  | -3.2952760 | -3.2707780 | 0.6217270  |
| H  | -2.7202680 | -4.2137350 | 2.0103620  |
| H  | -1.5650280 | -3.6705740 | 0.7745870  |
| C  | -1.0940070 | -2.3258120 | 3.1685750  |
| H  | -0.1389900 | -2.5377080 | 2.6646410  |
| H  | -1.3337390 | -3.1877030 | 3.8094660  |
| H  | -0.9523890 | -1.4566060 | 3.8288580  |
| C  | -3.5316780 | -1.7578470 | 2.9408240  |
| H  | -3.4116900 | -0.8380340 | 3.5340340  |
| H  | -3.7756030 | -2.5804180 | 3.6314050  |
| H  | -4.3851700 | -1.6179840 | 2.2599770  |
| C  | 3.1938150  | 0.2012260  | 0.3105940  |
| C  | 3.0677800  | -0.0519830 | 1.6864110  |
| C  | 4.0175420  | 1.2438370  | -0.1510770 |
| C  | 3.7664900  | 0.7429500  | 2.5988170  |
| H  | 2.4370400  | -0.8653510 | 2.0525140  |
| C  | 4.7026150  | 2.0359820  | 0.7703150  |
| H  | 4.1291110  | 1.4340430  | -1.2209340 |
| C  | 4.5784540  | 1.7858140  | 2.1425520  |
| H  | 3.6757300  | 0.5435340  | 3.6687000  |
| H  | 5.3395940  | 2.8490820  | 0.4155940  |
| H  | 5.1210290  | 2.4062810  | 2.8595070  |
| Cl | 3.8146580  | -1.6433910 | -2.0441400 |

## SUPPORTING INFORMATION

$[\text{Cp}^* \text{Ni}(\eta^3\text{-P}_4\text{tBuCl})]^+$  (**2g<sub>endo</sub>**):

B3LYP/def2SVP: Energies/H = -4155.171882, Enthalpies/H = -4155.170938, Free Energies/H = -4155.268938, ZPVE/ kJ/mol = 1447.38

| Symbol | X          | Y          | Z          |
|--------|------------|------------|------------|
| Ni     | 0.3450650  | 0.3379170  | -0.3107430 |
| P      | -2.6130210 | -0.1260560 | 0.1254290  |
| P      | -1.4803510 | 1.7430840  | -0.0630890 |
| P      | -1.1860410 | -1.1562480 | -1.1961550 |
| P      | -0.9432860 | 0.8906860  | -2.0547910 |
| C      | 1.7742210  | -0.7775190 | 0.8474630  |
| C      | 1.9318960  | 1.5388610  | 0.4222660  |
| C      | 1.5662680  | 0.5286320  | 1.3803290  |
| H      | 1.2081460  | 0.7408260  | 2.3813360  |
| C      | 2.2514060  | -0.5774700 | -0.5484570 |
| C      | 2.3566820  | 0.8397270  | -0.7394940 |
| H      | 2.7045670  | 1.3150820  | -1.6516350 |
| C      | 0.6140420  | -3.0589030 | 1.2988150  |
| H      | -0.3987300 | -2.6367910 | 1.3647250  |
| H      | 0.6523480  | -3.9349950 | 1.9652270  |
| H      | 0.7684270  | -3.4130250 | 0.2761870  |
| C      | 3.0623970  | -2.6804860 | 1.8692860  |
| H      | 3.4009340  | -3.1307440 | 0.9284750  |
| H      | 3.0298370  | -3.4811880 | 2.6242450  |
| H      | 3.8192240  | -1.9471500 | 2.1887540  |
| C      | 2.0731570  | 3.0348110  | 0.6738410  |
| C      | 1.2605170  | -1.5992300 | 3.1890340  |
| H      | 2.0054400  | -0.9344860 | 3.6516520  |
| H      | 1.1855170  | -2.4979110 | 3.8189560  |
| H      | 0.2805960  | -1.1005800 | 3.2115440  |
| C      | 2.8167530  | -1.5087930 | -1.6439330 |
| C      | 1.6637630  | -2.0233300 | 1.7569640  |
| C      | 2.2629970  | -2.9442160 | -1.6688200 |
| H      | 2.5091990  | -3.5183670 | -0.7690850 |
| H      | 2.7078480  | -3.4791420 | -2.5213400 |
| H      | 1.1715850  | -2.9578430 | -1.8068610 |
| C      | 2.5466900  | -0.9154120 | -3.0487220 |
| H      | 1.4688550  | -0.7994850 | -3.2408350 |
| H      | 2.9493970  | -1.5986550 | -3.8110240 |
| H      | 3.0295700  | 0.0584270  | -3.2076120 |
| C      | 4.3542640  | -1.5583080 | -1.4347680 |
| H      | 4.7978210  | -0.5529580 | -1.4987940 |
| H      | 4.8139610  | -2.1839510 | -2.2161460 |
| H      | 4.6221340  | -1.9841670 | -0.4579380 |
| C      | 1.6291500  | 3.8569360  | -0.5522310 |
| H      | 2.1791330  | 3.5743100  | -1.4624890 |
| H      | 1.8161460  | 4.9266670  | -0.3717540 |

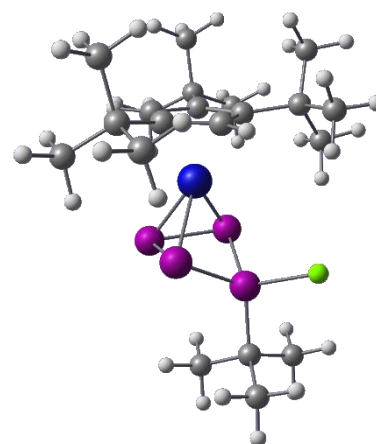

## SUPPORTING INFORMATION

|    |            |            |            |
|----|------------|------------|------------|
| H  | 0.5528370  | 3.7375650  | -0.7527110 |
| C  | 1.2767130  | 3.4805610  | 1.9137670  |
| H  | 0.2014180  | 3.2732340  | 1.8053740  |
| H  | 1.3964950  | 4.5645940  | 2.0614090  |
| H  | 1.6329110  | 2.9840230  | 2.8292200  |
| C  | 3.5823690  | 3.2859900  | 0.9305200  |
| H  | 3.9449670  | 2.6977300  | 1.7878360  |
| H  | 3.7504860  | 4.3518480  | 1.1519640  |
| H  | 4.1885350  | 3.0193580  | 0.0511030  |
| C  | -4.4503060 | -0.1260410 | -0.3434640 |
| C  | -5.1880790 | 0.8062220  | 0.6328760  |
| H  | -6.2498610 | 0.8412420  | 0.3404750  |
| H  | -5.1354180 | 0.4458720  | 1.6696590  |
| H  | -4.7981060 | 1.8352600  | 0.5954950  |
| C  | -4.9665680 | -1.5716440 | -0.2470600 |
| H  | -6.0308590 | -1.5779220 | -0.5319960 |
| H  | -4.4340690 | -2.2468020 | -0.9343200 |
| H  | -4.8884900 | -1.9719840 | 0.7734590  |
| C  | -4.5640320 | 0.3989300  | -1.7853670 |
| H  | -4.2010630 | 1.4328590  | -1.8840210 |
| H  | -4.0305520 | -0.2362450 | -2.5081320 |
| H  | -5.6299310 | 0.3944690  | -2.0640580 |
| Cl | -2.6140240 | -0.8422690 | 2.0780280  |

$[\text{Cp}^* \text{Ni}(\eta^3\text{-P}_3\text{Cl}^t\text{Bu})]^+$  (**2g<sub>exo</sub>**):

B3LYP/def2SVP: Energies/H = -4155.165046, Enthalpies/H = -4155.164101, Free Energies/H = -4155.262553, ZPVE/ kJ/mol = 1446.79

| Symbol | X          | Y          | Z          |
|--------|------------|------------|------------|
| Ni     | 0.2879420  | 0.2664310  | -0.3633960 |
| P      | -2.7704400 | -0.1484860 | -0.3778990 |
| P      | -1.5501270 | 1.6531000  | -0.6850400 |
| P      | -1.1247550 | -1.3807440 | -1.1777160 |
| P      | -0.6867860 | 0.4592850  | -2.3649790 |
| C      | 1.7526130  | -0.6891830 | 0.9283690  |
| C      | 1.6663240  | 1.6305590  | 0.5141100  |
| C      | 1.3479750  | 0.5830030  | 1.4390620  |
| H      | 0.9063680  | 0.7463630  | 2.4152940  |
| C      | 2.3065340  | -0.4329150 | -0.4236380 |
| C      | 2.2437440  | 0.9876080  | -0.6187650 |
| H      | 2.5984670  | 1.5033870  | -1.5056020 |
| C      | 0.7809730  | -3.0620100 | 1.3390580  |
| H      | -0.2703010 | -2.7429600 | 1.3983090  |
| H      | 0.8955080  | -3.9491710 | 1.9813680  |
| H      | 0.9784290  | -3.3676090 | 0.3070110  |
| C      | 3.1626300  | -2.4976380 | 1.9957330  |
| H      | 3.5505490  | -2.9552530 | 1.0787890  |
| H      | 3.1634160  | -3.2762000 | 2.7738540  |

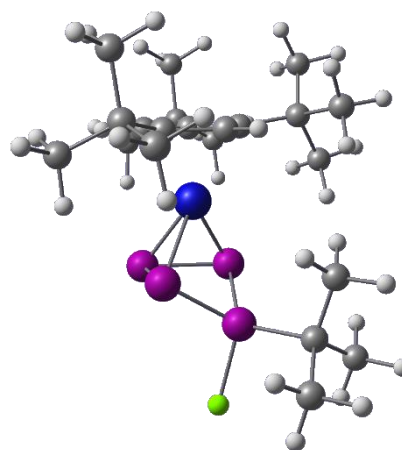



## SUPPORTING INFORMATION

---

|    |            |            |            |
|----|------------|------------|------------|
| H  | 3.8615240  | -1.7076310 | 2.3113960  |
| C  | 1.6462730  | 3.1287370  | 0.7877300  |
| C  | 1.2551660  | -1.5627420 | 3.2595320  |
| H  | 1.9306010  | -0.8366700 | 3.7364080  |
| H  | 1.2460960  | -2.4669500 | 3.8858620  |
| H  | 0.2371160  | -1.1493440 | 3.2723590  |
| C  | 3.0730650  | -1.2937290 | -1.4524940 |
| C  | 1.7244940  | -1.9441170 | 1.8353820  |
| C  | 2.6066680  | -2.7562830 | -1.5699770 |
| H  | 2.7698240  | -3.3370550 | -0.6558690 |
| H  | 3.1785110  | -3.2504650 | -2.3697750 |
| H  | 1.5412670  | -2.8235440 | -1.8391500 |
| C  | 2.9649510  | -0.6821850 | -2.8708060 |
| H  | 1.9211560  | -0.6127830 | -3.2119780 |
| H  | 3.5070560  | -1.3259930 | -3.5790190 |
| H  | 3.4167950  | 0.3169910  | -2.9414100 |
| C  | 4.5736350  | -1.2501180 | -1.0539700 |
| H  | 4.9478750  | -0.2148760 | -1.0492950 |
| H  | 5.1657730  | -1.8219030 | -1.7858510 |
| H  | 4.7566480  | -1.6788910 | -0.0607700 |
| C  | 1.3927230  | 3.9389190  | -0.4980710 |
| H  | 2.1494190  | 3.7361820  | -1.2708700 |
| H  | 1.4347060  | 5.0154490  | -0.2725450 |
| H  | 0.4003010  | 3.7285140  | -0.9260090 |
| C  | 0.6028110  | 3.5023190  | 1.8567740  |
| H  | -0.4181650 | 3.2421210  | 1.5396090  |
| H  | 0.6321670  | 4.5871620  | 2.0404980  |
| H  | 0.8036020  | 3.0038360  | 2.8174180  |
| C  | 3.0601330  | 3.4751270  | 1.3278350  |
| H  | 3.2872770  | 2.9124650  | 2.2466450  |
| H  | 3.1151470  | 4.5498190  | 1.5629610  |
| H  | 3.8398640  | 3.2470710  | 0.5849090  |
| C  | -3.5906340 | -0.4868140 | 1.2909720  |
| Cl | -4.3624740 | -0.1877760 | -1.7149600 |
| C  | -2.5039500 | -0.3957630 | 2.3744590  |
| H  | -1.7108750 | -1.1410780 | 2.2271030  |
| H  | -2.0465350 | 0.6034340  | 2.4246500  |
| H  | -2.9740320 | -0.5981620 | 3.3500010  |
| C  | -4.1984760 | -1.8997750 | 1.2436040  |
| H  | -4.6837520 | -2.1005480 | 2.2121690  |
| H  | -4.9606340 | -1.9956930 | 0.4574230  |
| H  | -3.4302550 | -2.6732110 | 1.0890160  |
| C  | -4.6705170 | 0.5853590  | 1.5219060  |
| H  | -5.1232350 | 0.4070080  | 2.5104870  |
| H  | -4.2496910 | 1.6028400  | 1.5279590  |
| H  | -5.4694980 | 0.5379690  | 0.7697260  |

## SUPPORTING INFORMATION

 $[(Cp''Ni)_2(\mu;\eta^3:\eta^1:\eta^1-P_4Br_3)]^+ (3a)$ 

B3LYP/def2SVP: Energies/H = -13431.720505, Enthalpies/H = -13431.719561, Free Energies/H = -13431.862697, ZPVE/ kJ/mol = 2238.06

| Symbol | X          | Y          | Z          |
|--------|------------|------------|------------|
| Br     | 0.4276270  | -3.2108310 | -0.9767950 |
| Br     | -1.7734950 | 3.3687370  | -1.5796430 |
| Br     | -0.6430860 | 2.9114590  | 1.6925810  |
| Ni     | -1.8540770 | -0.1688950 | -0.2675090 |
| Ni     | 2.1710910  | -0.0228290 | -0.0661190 |
| P      | 0.1980350  | -0.9820290 | -0.6017910 |
| P      | -0.8911990 | 1.7716430  | -0.2492840 |
| P      | 1.3179120  | -0.0123730 | -2.2139420 |
| P      | 1.2345360  | 1.8252680  | -1.0197630 |
| C      | 3.4205370  | -1.4313050 | 0.8363200  |
| H      | 3.2623850  | -2.5039240 | 0.7874840  |
| C      | -3.0242700 | -1.8426840 | -0.6265850 |
| H      | -2.5916550 | -2.8078670 | -0.8690220 |
| C      | -3.9084590 | -0.1140010 | 0.6083700  |
| C      | -3.4107050 | -0.8753860 | -1.6010230 |
| C      | 2.8770810  | -0.5844290 | 1.8626970  |
| C      | 3.2912630  | 0.7248010  | 1.5205670  |
| H      | 3.0378520  | 1.6191450  | 2.0795770  |
| C      | -3.8282730 | 0.2271790  | -0.8311640 |
| H      | -4.1441360 | 1.1824360  | -1.2405390 |
| C      | -3.4187640 | -1.4442860 | 0.7290730  |
| C      | 4.2594910  | -0.6958510 | -0.0646960 |
| C      | 4.1589260  | 0.7025420  | 0.3508660  |
| C      | -4.6960960 | -2.6624210 | 2.5641490  |
| H      | -5.0633030 | -1.7702650 | 3.0836780  |
| H      | -4.6242010 | -3.4684010 | 3.3113430  |
| H      | -5.4510330 | -2.9610250 | 1.8200690  |
| C      | 2.2029600  | -1.0280920 | 3.1517760  |
| C      | -3.4431690 | -1.0231490 | -3.1187470 |
| C      | -3.3153400 | -2.4498120 | 1.9012450  |
| C      | -4.6533930 | 0.8526050  | 1.5540420  |
| C      | 4.9198790  | 1.9817780  | -0.0711430 |
| C      | -4.5913220 | 2.3077910  | 1.0320210  |
| H      | -3.5589460 | 2.6709310  | 0.9393660  |
| H      | -5.1066760 | 2.9660850  | 1.7472070  |
| H      | -5.0934360 | 2.4365280  | 0.0631470  |
| C      | -6.1499040 | 0.4395600  | 1.5415840  |
| H      | -6.5556660 | 0.4642540  | 0.5180080  |
| H      | -6.7342260 | 1.1466270  | 2.1522560  |
| H      | -6.3096540 | -0.5689330 | 1.9427560  |
| C      | 5.1288540  | -1.4808300 | -1.0723170 |
| C      | -2.2728050 | -2.0199370 | 2.9547360  |

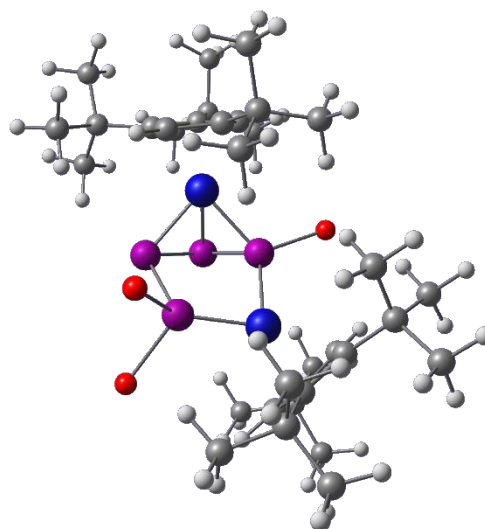

## SUPPORTING INFORMATION

---

|   |            |            |            |
|---|------------|------------|------------|
| H | -1.2709930 | -1.9831270 | 2.5058010  |
| H | -2.2442500 | -2.7526420 | 3.7774690  |
| H | -2.4820930 | -1.0363460 | 3.3875310  |
| C | -2.5349950 | -2.1738960 | -3.5874350 |
| H | -1.4842700 | -2.0012590 | -3.3096920 |
| H | -2.5822380 | -2.2640960 | -4.6836930 |
| H | -2.8459890 | -3.1420080 | -3.1652020 |
| C | 5.5338770  | -0.7277690 | -2.3508350 |
| H | 4.6514900  | -0.3854440 | -2.9118970 |
| H | 6.0949470  | -1.4140600 | -3.0029610 |
| H | 6.1863690  | 0.1311660  | -2.1585190 |
| C | 1.6353250  | -2.4520490 | 3.0216280  |
| H | 0.9002250  | -2.5244640 | 2.2070410  |
| H | 1.1332100  | -2.7420510 | 3.9567910  |
| H | 2.4276160  | -3.1920400 | 2.8315870  |
| C | -4.1233050 | 0.8852340  | 2.9992700  |
| H | -4.2643170 | -0.0616260 | 3.5316530  |
| H | -4.6664240 | 1.6559750  | 3.5675920  |
| H | -3.0539110 | 1.1433490  | 3.0230520  |
| C | -4.9058930 | -1.3466870 | -3.5128670 |
| H | -5.2533470 | -2.2729310 | -3.0285990 |
| H | -4.9867790 | -1.4808200 | -4.6037350 |
| H | -5.5870660 | -0.5330860 | -3.2179560 |
| C | 4.6832390  | 2.4195240  | -1.5339210 |
| H | 4.8420150  | 1.6193670  | -2.2601970 |
| H | 5.3721620  | 3.2421890  | -1.7814440 |
| H | 3.6600060  | 2.7998790  | -1.6672780 |
| C | -3.0095780 | 0.2795880  | -3.8163990 |
| H | -3.6439150 | 1.1318350  | -3.5288780 |
| H | -3.0864120 | 0.1658160  | -4.9092460 |
| H | -1.9666850 | 0.5349590  | -3.5735480 |
| C | 1.0906600  | -0.0495900 | 3.5674840  |
| H | 1.4743060  | 0.9729990  | 3.7024280  |
| H | 0.6515840  | -0.3663490 | 4.5260690  |
| H | 0.2868540  | -0.0126910 | 2.8184120  |
| C | 6.4066120  | -1.9196250 | -0.3067730 |
| H | 6.9964770  | -1.0604520 | 0.0411210  |
| H | 7.0455020  | -2.5243300 | -0.9697650 |
| H | 6.1523900  | -2.5334960 | 0.5709580  |
| C | 6.4308260  | 1.7475600  | 0.1820480  |
| H | 6.6137380  | 1.4067340  | 1.2131700  |
| H | 6.9751150  | 2.6937570  | 0.0381030  |
| H | 6.8651350  | 1.0101780  | -0.5038180 |
| C | 3.3088850  | -1.0306570 | 4.2403680  |
| H | 4.1333600  | -1.7095730 | 3.9724240  |
| H | 2.8857580  | -1.3701790 | 5.1990260  |
| H | 3.7281170  | -0.0237090 | 4.3890610  |

## SUPPORTING INFORMATION

|   |            |            |            |
|---|------------|------------|------------|
| C | -2.8723070 | -3.8369780 | 1.3793830  |
| H | -3.5805460 | -4.2474080 | 0.6430760  |
| H | -2.8296990 | -4.5408810 | 2.2241950  |
| H | -1.8715110 | -3.8114640 | 0.9247150  |
| C | 4.3968950  | -2.7620210 | -1.5401390 |
| H | 4.1924790  | -3.4667760 | -0.7223020 |
| H | 5.0332140  | -3.2927250 | -2.2637680 |
| H | 3.4452370  | -2.5248940 | -2.0381780 |
| C | 4.4998360  | 3.1780070  | 0.8151450  |
| H | 3.4238050  | 3.3940030  | 0.7356980  |
| H | 5.0397530  | 4.0756460  | 0.4792960  |
| H | 4.7506020  | 3.0220540  | 1.8749860  |

$[(Cp''Ni)_2(\mu;\eta^3:\eta^1:\eta^1-P_4biphenC)]^+ (\mathbf{3b})$ :

B3LYP/def2SVP: Energies/H = -6631.766303, Enthalpies/H = -6631.765358, Free Energies/H = -6631.918303, ZPVE/ kJ/mol = 2656.45

| Symbol | X          | Y          | Z          |
|--------|------------|------------|------------|
| Ni     | 1.7698811  | -0.6463039 | 0.3271271  |
| Ni     | -2.2512149 | -0.2667362 | 0.2133180  |
| P      | -0.3025568 | -1.3049820 | 0.6963321  |
| P      | 0.9694810  | 1.4211141  | 0.2737259  |
| Cl     | -0.6460077 | -3.3539850 | 1.1295232  |
| P      | -1.1571260 | 1.5448410  | 1.0978159  |
| P      | -1.3107119 | -0.2578070 | 2.3183080  |
| C      | 1.3617919  | 3.7259250  | -1.0405592 |
| C      | 3.2041432  | -1.9757749 | -0.7643889 |
| C      | 2.8035032  | -2.4268218 | 0.5666302  |
| H      | 2.2939133  | -3.3654998 | 0.7576772  |
| C      | 3.2920552  | -1.5626357 | 1.5936841  |
| C      | 3.8073211  | -0.6999218 | -0.5681399 |
| C      | -4.4141279 | -0.5917233 | 0.3922930  |
| C      | -4.1248510 | 0.6537597  | -0.3320301 |
| C      | -3.1503128 | -1.1158433 | -1.5423280 |
| C      | 1.7132639  | 2.8284541  | 1.1800609  |
| C      | 3.7877081  | -0.4494687 | 0.8925381  |
| H      | 4.1963920  | 0.4450003  | 1.3542470  |
| C      | -3.3400579 | 0.2840407  | -1.4945790 |
| H      | -3.0059810 | 0.9846567  | -2.2521171 |
| C      | 1.8341388  | 3.9599281  | 0.3368958  |
| C      | 0.8673889  | 2.4172270  | -1.2558541 |
| C      | -3.7547268 | -1.6275203 | -0.3390229 |
| H      | -3.7507147 | -2.6755873 | -0.0598149 |
| C      | 3.3434802  | -1.8282657 | 3.0953121  |
| C      | 0.3893940  | 2.0251269  | -2.5078851 |
| H      | 0.0169260  | 1.0128058  | -2.6668630 |

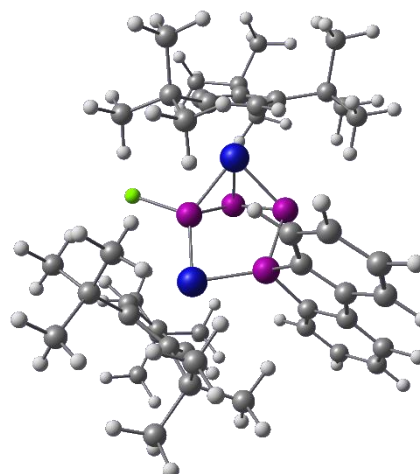

## SUPPORTING INFORMATION

---

|   |            |            |            |
|---|------------|------------|------------|
| C | 2.0992179  | 2.8867512  | 2.5208989  |
| H | 1.9926019  | 2.0166203  | 3.1693069  |
| C | -5.3011689 | -0.9340623 | 1.6141710  |
| C | 1.3651528  | 4.6385639  | -2.1042492 |
| H | 1.7429047  | 5.6532800  | -1.9620353 |
| C | 2.3663338  | 5.1467272  | 0.8575897  |
| H | 2.4725117  | 6.0299691  | 0.2242127  |
| C | -2.6872788 | -1.9343243 | -2.7387249 |
| C | -4.6992660 | 2.0867277  | -0.2659811 |
| C | 2.6262158  | 4.0796503  | 3.0279208  |
| H | 2.9336578  | 4.1347464  | 4.0745848  |
| C | 2.7606557  | 5.1999693  | 2.1976487  |
| H | 3.1751977  | 6.1270043  | 2.6006517  |
| C | 4.6336011  | 0.2468582  | -1.4659290 |
| C | 0.3970179  | 2.9466778  | -3.5604791 |
| H | 0.0272470  | 2.6505517  | -4.5447491 |
| C | 2.9642553  | -2.8775609 | -1.9987178 |
| C | -4.8595749 | -0.2626062 | 2.9341580  |
| H | -4.7045130 | 0.8163058  | 2.8441459  |
| H | -5.6298719 | -0.4296232 | 3.7037240  |
| H | -3.9222739 | -0.7053041 | 3.2988010  |
| C | 0.8829018  | 4.2451039  | -3.3558342 |
| H | 0.8881468  | 4.9583708  | -4.1833983 |
| C | 6.0772141  | -0.3209127 | -1.5224219 |
| H | 6.1196192  | -1.3044698 | -2.0066919 |
| H | 6.7260161  | 0.3666463  | -2.0891100 |
| H | 6.4984861  | -0.4237306 | -0.5099979 |
| C | 1.9313862  | -2.2669811 | -2.9700379 |
| H | 2.2352872  | -1.2880671 | -3.3564329 |
| H | 1.7750663  | -2.9374681 | -3.8307048 |
| H | 0.9656892  | -2.1405461 | -2.4607479 |
| C | 4.7356650  | 1.6580612  | -0.8415531 |
| H | 5.2873750  | 1.6633493  | 0.1089200  |
| H | 5.2808970  | 2.3197922  | -1.5310581 |
| H | 3.7474740  | 2.1034742  | -0.6685311 |
| C | -4.9553281 | 2.6411257  | 1.1463878  |
| H | -4.0337621 | 2.6540688  | 1.7477838  |
| H | -5.3116472 | 3.6792377  | 1.0635968  |
| H | -5.7234981 | 2.0820647  | 1.6919129  |
| C | 4.0877331  | 0.4385281  | -2.8928500 |
| H | 3.0614551  | 0.8343890  | -2.8761730 |
| H | 4.7175570  | 1.1659721  | -3.4282200 |
| H | 4.0937451  | -0.4840730 | -3.4831159 |
| C | -1.7074758 | -1.1415173 | -3.6187259 |
| H | -0.7951908 | -0.8841872 | -3.0621130 |
| H | -1.4100158 | -1.7460863 | -4.4889389 |
| H | -2.1545389 | -0.2119324 | -4.0018950 |

## SUPPORTING INFORMATION

---

|   |            |            |            |
|---|------------|------------|------------|
| C | -6.0336530 | 2.0573675  | -1.0626691 |
| H | -6.7759980 | 1.3863205  | -0.6126551 |
| H | -6.4641681 | 3.0709075  | -1.0916142 |
| H | -5.8663450 | 1.7311705  | -2.1007661 |
| C | 4.2885013  | -3.1772959 | -2.7376988 |
| H | 5.0324243  | -3.6150148 | -2.0537358 |
| H | 4.1038424  | -3.9049420 | -3.5438808 |
| H | 4.7321502  | -2.2876189 | -3.1989068 |
| C | -3.7725591 | 3.0984657  | -0.9832482 |
| H | -3.6674931 | 2.8929256  | -2.0576322 |
| H | -4.2087132 | 4.1044737  | -0.8942852 |
| H | -2.7698811 | 3.1269068  | -0.5339052 |
| C | -3.9697578 | -2.2359365 | -3.5603789 |
| H | -4.4540858 | -1.3075715 | -3.9001120 |
| H | -3.7113157 | -2.8337475 | -4.4489669 |
| H | -4.7004647 | -2.8065535 | -2.9665649 |
| C | 2.4003674  | -4.2491240 | -1.5575448 |
| H | 1.4263123  | -4.1589210 | -1.0553788 |
| H | 2.2542714  | -4.8815270 | -2.4463937 |
| H | 3.0898794  | -4.7805869 | -0.8835567 |
| C | -6.7711989 | -0.5634974 | 1.2984990  |
| H | -7.0949309 | -0.9946694 | 0.3382680  |
| H | -7.4265719 | -0.9652234 | 2.0868000  |
| H | -6.9340490 | 0.5206516  | 1.2612559  |
| C | -5.2721468 | -2.4579383 | 1.8770181  |
| H | -4.2545018 | -2.8182992 | 2.0920751  |
| H | -5.8926108 | -2.6804222 | 2.7580401  |
| H | -5.6791857 | -3.0355673 | 1.0333451  |
| C | -2.0462177 | -3.2662223 | -2.3151788 |
| H | -2.7414827 | -3.8941193 | -1.7376488 |
| H | -1.7505637 | -3.8384973 | -3.2076798 |
| H | -1.1499747 | -3.1047782 | -1.7012088 |
| C | 4.8016552  | -2.2151875 | 3.4461382  |
| H | 5.5005441  | -1.3980905 | 3.2076281  |
| H | 4.8913882  | -2.4377415 | 4.5220102  |
| H | 5.1204943  | -3.1084856 | 2.8861432  |
| C | 2.4159572  | -2.9916287 | 3.4898962  |
| H | 2.7026823  | -3.9299297 | 2.9901782  |
| H | 2.4766142  | -3.1662196 | 4.5754452  |
| H | 1.3657722  | -2.7811458 | 3.2395522  |
| C | 2.9493471  | -0.5748056 | 3.8977601  |
| H | 1.9124671  | -0.2762537 | 3.6761390  |
| H | 3.0231811  | -0.7743756 | 4.9785541  |
| H | 3.6113460  | 0.2758134  | 3.6745730  |



## SUPPORTING INFORMATION

Selected canonical molecular orbitals of **3a**

To obtain further insight into the electronic structure of **3a** we performed a Mulliken population analysis on its optimized geometry. While most of the canonical frontier orbitals (HOMO-5 to LUMO+1, Figure SI 24) are smeared across large parts of the cation, the orbital contributions of P1 and P4 in the HOMO-4 (Significant orbital contributions: Ni2(d) = 20 %, P1(p) = 7 %, P4(p) = 6 %) may yield a possible explanation for the relatively high  $^2J_{P-P}$  coupling constant found in the  $^{31}\text{P}$  NMR spectra of **3a**. The bonding motif found for P1-Ni2-P4 in the HOMO-4 resembles an allylic-type interaction.

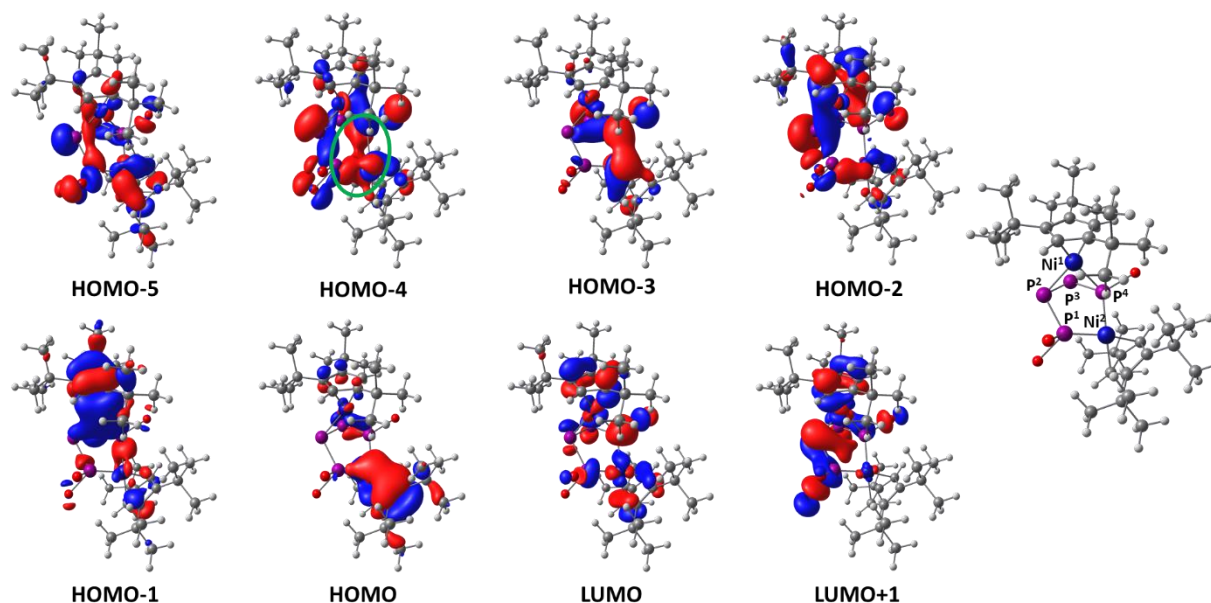

Figure SI 24: Canonical frontier orbitals of **3a**; The allylic part of the HOMO-4, which is stretched across P1, Ni2 and P4 is marked in green, isosurfaces are drawn with both signs and at a 0.03 contour value.

## References

- [1] <https://omics.pnl.gov/software/molecular-weight-calculator>, (27.12.2019).
- [2] E. Mädl, G. Balázs, E. V. Peresykina, M. Scheer, *Angew. Chem. Int. Ed.* **2016**, *55*, 7702–7707.
- [3] M. Gonsior, I. Krossing, N. Mitzel, *Z. Anorg. Allg. Chem.* **2002**, *628*, 1821–1830.
- [4] S. J. Connelly, W. Kaminsky, D. M. Heinekey, *Organometallics* **2013**, *32*, 7478–7481.
- [5] H. T. Teunissen, C. B. Hansen, F. Bickelhaupt, *Phosphorus, Sulfur, and Silicon and the Relat. Elem.* **1996**, *118*, 309–312.
- [6] M. Fild, O. Stelzer, R. Schmutzler, G. O. Doak, "Tert-butylchlorophosphine and Di-tert-butylchlorophosphine" in (A. Wold, J. K. Ruff, Inorganic Syntheses **1973**, *12* - Wiley-Interscience, Hoboken, N. J.), 4–9.
- [7] M. Scheer, M. Piesch, S. Reichl, Dielmann, Fabian, *Chem. Eur. J.* **2019**.
- [8] Agilent (2014). CrysAlis PRO. Agilent Technologies Ltd, Yarnton, Oxfordshire, England.
- [9] O. V. Dolomanov, L. J. Bourhis, R. J. Gildea, J. A. K. Howard, H. Puschmann, *J. Appl. Crystallogr.* **2009**, *42*, 339–341.
- [10] G. M. Sheldrick, *Acta Crystallogr. A* **2015**, *71*, 3–8.
- [11] a) G. M. Sheldrick, *Acta Crystallogr. C* **2015**, *71*, 3–8; b) G. M. Sheldrick, *Acta Crystallogr. A* **2008**, *64*, 112–122.
- [12] Miriam Eberl, *Dissertation*, University of Regensburg **2011**.
- [13] M. J. Frisch, G. W. Trucks, H. B. Schlegel, G. E. Scuseria, M. A. Robb, J. R. Cheeseman, G. Scalmani, V. Barone, B. Mennucci, G. A. Petersson, H. Nakatsuji, M. Caricato, X. Li, H. P. Hratchian, A. F. Izmaylov, J. Bloino, G. Zheng, J. L. Sonnenberg, M. Hada, M. Ehara, K. Toyota, R. Fukuda, J. Hasegawa, M. Ishida, T. Nakajima, Y. Honda, O. Kitao, H. Nakai, T. Vreven, J. A. Montgomery Jr., J. E. Peralta, F. Ogliaro, M. Bearpark, J. J. Heyd, E. Brothers, K. N. Kudin, V. N. Staroverov, T. Keith, R. Kobayashi, J. Normand, K. Raghavachari, A. Rendell, J. C. Burant, S. S. Iyengar, J. Tomasi, M. Cossi, N. Rega, J. M. Millam, M. Klene, J. E. Knox, J. B. Cross, V. Bakken, C. Adamo, J. Jaramillo, R. Gomperts, R. E. Stratmann, O. Yazyev, A. J. Austin, R. Cammi, C. Pomelli, J. W. Ochterski, R. L. Martin, K. Morokuma, V. G. Zakrzewski, G. A. Voth, P. Salvador, J. J. Dannenberg, S. Dapprich, A. D. Daniels, O. Farkas, J. B. Foresman, J. V. Ortiz, J. Cioslowski, D. J. Fox, "Gaussian 09", Revision E.01, Gaussian Inc., Wallingford CT **2013**.
- [14] A. D. Becke, *Phys. Rev. A* **1988**, *38*, 3098–3100.
- [15] C. Lee, W. Yang, R. G. Parr, *Phys. Rev. B* **1988**, *37*, 785–789.
- [16] F. Weigend, R. Ahlrichs, *PhyChemChemPhys* **2005**, *7*, 3297–3305.

SUPPORTING INFORMATION

---

[17] J. Tomasi, B. Mennucci, R. Cammi, *Chem. Rev.* **2005**, *105*, 2999–3093.

[18] E. D. Glendening, C. R. Landis, F. Weinhold, *J. Comput. Chem.* **2013**, *34*, 1429–1437.
